# Supplementary material
Source: publisher figshare collection journal article supplement (https://geolsoc.figshare.com/ndownloader/files/13481090)
Supplement: Supplementary file 1 [file 13481090]

## Sheet: PlotDat8
Source sheet	UAE Reporting table	500	0	530	0	500	0
Plot name	ProbDens4	500.3	0	560	0	1099.7	0
Plot Type	16	500.6	0	560	2
1st free col	9	500.9	0	530	2
Sigma Level	2	501.2	0	530	0
Absolute Errs	TRUE	501.5	0	ErrBox	ErrBox
Symbol Type	1	501.8	0	560	0
Inverse Plot	FALSE	502.1	0	590	0
Color Plot	TRUE	502.4	0	590	1
3D plot	FALSE	502.7	0	560	1
Linear	FALSE	503	0	560	0
Data Range	AC277:AD335	503.3	0	ErrBox	ErrBox
Filled Symbols	TRUE	503.6	0	590	0
ConcAge	FALSE	503.9	0	620	0
ConcSwap	FALSE	504.2	0	620	14
1st Symbol-row	1	504.5	0	590	14
		504.8	0	590	0
		505.1	0	ErrBox	ErrBox
		505.4	0	620	0
		505.7	0	650	0
		506	0	650	11
		506.3	0	620	11
		506.6	0	620	0
		506.9	0	ErrBox	ErrBox
		507.2	0	650	0
		507.5	0	680	0
		507.8	0	680	6
		508.1	0	650	6
		508.4	0	650	0
		508.7	0	ErrBox	ErrBox
		509	0	680	0
		509.3	0	710	0
		509.6	0	710	1
		509.9	0	680	1
		510.2	0	680	0
		510.5	0	ErrBox	ErrBox
		510.8	0	740	0
		511.1	0	770	0
		511.4	1.80378e-08	770	3
		511.7	2.2082e-08	740	3
		512	2.69816e-08	740	0
		512.3	3.29061e-08	ErrBox	ErrBox
		512.6	4.00555e-08	770	0
		512.9	4.86659e-08	800	0
		513.2	5.90154e-08	800	7
		513.5	7.14304e-08	770	7
		513.8	8.62935e-08	770	0
		514.1	1.04052e-07	ErrBox	ErrBox
		514.4	1.25228e-07	800	0
		514.7	1.50428e-07	830	0
		515	1.80357e-07	830	4
		515.3	2.15832e-07	800	4
		515.6	2.57795e-07	800	0
		515.9	3.07335e-07	ErrBox	ErrBox
		516.2	3.65701e-07	830	0
		516.5	4.34329e-07	860	0
		516.8	5.14858e-07	860	2
		517.1	6.09164e-07	830	2
		517.4	7.19381e-07	830	0
		517.7	8.47931e-07	ErrBox	ErrBox
		518	9.97561e-07	860	0
		518.3	1.17137e-06	890	0
		518.6	1.37287e-06	890	2
		518.9	1.60598e-06	860	2
		519.2	1.87512e-06	860	0
		519.5	2.18522e-06	ErrBox	ErrBox
		519.8	2.54179e-06	890	0
		520.1	2.95094e-06	920	0
		520.4	3.41946e-06	920	1
		520.7	3.95488e-06	890	1
		521	4.56548e-06	890	0
		521.3	5.26038e-06	ErrBox	ErrBox
		521.6	6.04958e-06	920	0
		521.9	6.94401e-06	950	0
		522.2	7.95561e-06	950	2
		522.5	9.09732e-06	920	2
		522.8	1.03832e-05	920	0
		523.1	1.18284e-05	ErrBox	ErrBox
		523.4	1.34493e-05	950	0
		523.7	1.52633e-05	980	0
		524	1.72892e-05	980	1
		524.3	1.9547e-05	950	1
		524.6	2.20578e-05	950	0
		524.9	2.4844e-05	ErrBox	ErrBox
		525.2	2.79292e-05	980	0
		525.5	3.13381e-05	1010	0
		525.8	3.50966e-05	1010	1
		526.1	3.92314e-05	980	1
		526.4	4.37704e-05	980	0
		526.7	4.87421e-05	ErrBox	ErrBox
		527	5.41759e-05	1010	0
		527.3	6.01014e-05	1040	0
		527.6	6.65679e-05	1040	1
		527.9	7.35724e-05	1010	1
		528.2	8.11604e-05	1010	0
		528.5	8.93621e-05	ErrBox	ErrBox
		528.8	9.82069e-05
		529.1	0.000107724
		529.4	0.00011794
		529.7	0.000128882
		530	0.000140574
		530.3	0.000153038
		530.6	0.000166294
		530.9	0.000180359
		531.2	0.000195246
		531.5	0.000210965
		531.8	0.000227542
		532.1	0.000244944
		532.4	0.000263185
		532.7	0.000282256
		533	0.000302146
		533.3	0.000322836
		533.6	0.000344304
		533.9	0.000366519
		534.2	0.000389448
		534.5	0.00041305
		534.8	0.000437278
		535.1	0.000462082
		535.4	0.000487404
		535.7	0.000513182
		536	0.000539348
		536.3	0.000565832
		536.6	0.000592557
		536.9	0.000619446
		537.2	0.000646417
		537.5	0.000673386
		537.8	0.000700267
		538.1	0.000726976
		538.4	0.000753427
		538.7	0.000779536
		539	0.000805221
		539.3	0.000830403
		539.6	0.000855005
		539.9	0.000878959
		540.2	0.000902198
		540.5	0.000924665
		540.8	0.000946307
		541.1	0.000967083
		541.4	0.000986957
		541.7	0.0010059
		542	0.00102391
		542.3	0.00104096
		542.6	0.00105708
		542.9	0.00107226
		543.2	0.00108654
		543.5	0.00109996
		543.8	0.00111255
		544.1	0.00112438
		544.4	0.0011355
		544.7	0.00114599
		545	0.00115593
		545.3	0.0011654
		545.6	0.0011745
		545.9	0.00118331
		546.2	0.00119194
		546.5	0.00120048
		546.8	0.00120904
		547.1	0.0012177
		547.4	0.00122657
		547.7	0.00123573
		548	0.00124526
		548.3	0.00125525
		548.6	0.00126577
		548.9	0.00127687
		549.2	0.0012886
		549.5	0.00130101
		549.8	0.00131412
		550.1	0.00132794
		550.4	0.00134247
		550.7	0.00135771
		551	0.00137362
		551.3	0.00139018
		551.6	0.00140732
		551.9	0.00142499
		552.2	0.00144312
		552.5	0.00146161
		552.8	0.00148038
		553.1	0.00149931
		553.4	0.00151831
		553.7	0.00153724
		554	0.001556
		554.3	0.00157446
		554.6	0.00159249
		554.9	0.00160996
		555.2	0.00162675
		555.5	0.00164274
		555.8	0.00165781
		556.1	0.00167184
		556.4	0.00168473
		556.7	0.00169637
		557	0.00170668
		557.3	0.00171559
		557.6	0.00172299
		557.9	0.00172883
		558.2	0.00173307
		558.5	0.00173566
		558.8	0.00173656
		559.1	0.00173576
		559.4	0.00173325
		559.7	0.00172902
		560	0.00172309
		560.3	0.00171546
		560.6	0.00170617
		560.9	0.00169525
		561.2	0.00168273
		561.5	0.00166867
		561.8	0.00165312
		562.1	0.00163612
		562.4	0.00161775
		562.7	0.00159806
		563	0.00157711
		563.3	0.00155499
		563.6	0.00153174
		563.9	0.00150745
		564.2	0.00148219
		564.5	0.00145601
		564.8	0.00142899
		565.1	0.0014012
		565.4	0.0013727
		565.7	0.00134357
		566	0.00131387
		566.3	0.00128367
		566.6	0.00125302
		566.9	0.001222
		567.2	0.00119066
		567.5	0.00115906
		567.8	0.00112728
		568.1	0.00109538
		568.4	0.00106341
		568.7	0.00103144
		569	0.000999536
		569.3	0.000967757
		569.6	0.000936168
		569.9	0.000904853
		570.2	0.000873845
		570.5	0.000843225
		570.8	0.000813059
		571.1	0.000783417
		571.4	0.000754404
		571.7	0.000726021
		572	0.000698371
		572.3	0.000671523
		572.6	0.000645549
		572.9	0.00062052
		573.2	0.00059651
		573.5	0.000573608
		573.8	0.000551854
		574.1	0.000531335
		574.4	0.000512142
		574.7	0.000494316
		575	0.000477945
		575.3	0.0004631
		575.6	0.000449854
		575.9	0.000438262
		576.2	0.00042845
		576.5	0.000420434
		576.8	0.00041432
		577.1	0.000410143
		577.4	0.000408006
		577.7	0.000407942
		578	0.000410033
		578.3	0.000414343
		578.6	0.000420934
		578.9	0.000429886
		579.2	0.000441222
		579.5	0.000455013
		579.8	0.000471328
		580.1	0.000490182
		580.4	0.000511634
		580.7	0.000535722
		581	0.000562478
		581.3	0.00059193
		581.6	0.000624099
		581.9	0.000658997
		582.2	0.00069663
		582.5	0.000736997
		582.8	0.000780086
		583.1	0.000825878
		583.4	0.000874344
		583.7	0.000925445
		584	0.000979135
		584.3	0.00103535
		584.6	0.00109404
		584.9	0.00115511
		585.2	0.00121849
		585.5	0.00128408
		585.8	0.00135179
		586.1	0.0014215
		586.4	0.0014931
		586.7	0.0015665
		587	0.00164156
		587.3	0.00171817
		587.6	0.00179621
		587.9	0.00187556
		588.2	0.00195611
		588.5	0.00203775
		588.8	0.0021204
		589.1	0.00220395
		589.4	0.00228831
		589.7	0.00237345
		590	0.00245928
		590.3	0.00254576
		590.6	0.00263289
		590.9	0.00272065
		591.2	0.00280906
		591.5	0.00289814
		591.8	0.00298794
		592.1	0.00307852
		592.4	0.00316997
		592.7	0.00326239
		593	0.00335588
		593.3	0.00345059
		593.6	0.00354662
		593.9	0.00364416
		594.2	0.00374333
		594.5	0.00384428
		594.8	0.00394722
		595.1	0.00405224
		595.4	0.00415954
		595.7	0.00426924
		596	0.00438149
		596.3	0.00449639
		596.6	0.00461406
		596.9	0.00473457
		597.2	0.00485798
		597.5	0.00498432
		597.8	0.00511359
		598.1	0.00524578
		598.4	0.00538082
		598.7	0.00551861
		599	0.00565904
		599.3	0.00580195
		599.6	0.00594714
		599.9	0.00609438
		600.2	0.0062434
		600.5	0.00639392
		600.8	0.00654561
		601.1	0.00669811
		601.4	0.00685104
		601.7	0.007004
		602	0.00715656
		602.3	0.00730829
		602.6	0.00745873
		602.9	0.0076074
		603.2	0.00775382
		603.5	0.00789755
		603.8	0.00803808
		604.1	0.00817494
		604.4	0.0083077
		604.7	0.00843587
		605	0.00855903
		605.3	0.00867676
		605.6	0.00878869
		605.9	0.00889443
		606.2	0.00899365
		606.5	0.00908604
		606.8	0.00917133
		607.1	0.00924927
		607.4	0.00931966
		607.7	0.00938233
		608	0.00943716
		608.3	0.00948402
		608.6	0.00952288
		608.9	0.00955371
		609.2	0.00957655
		609.5	0.00959141
		609.8	0.00959839
		610.1	0.00959762
		610.4	0.00958924
		610.7	0.00957343
		611	0.00955039
		611.3	0.00952037
		611.6	0.00948361
		611.9	0.0094404
		612.2	0.00939103
		612.5	0.0093358
		612.8	0.00927505
		613.1	0.0092091
		613.4	0.00913831
		613.7	0.00906304
		614	0.00898365
		614.3	0.00890051
		614.6	0.00881399
		614.9	0.00872445
		615.2	0.00863227
		615.5	0.00853783
		615.8	0.00844148
		616.1	0.0083436
		616.4	0.00824455
		616.7	0.00814468
		617	0.00804434
		617.3	0.00794388
		617.6	0.00784364
		617.9	0.00774394
		618.2	0.0076451
		618.5	0.00754744
		618.8	0.00745127
		619.1	0.00735687
		619.4	0.00726453
		619.7	0.00717451
		620	0.00708709
		620.3	0.0070025
		620.6	0.00692099
		620.9	0.00684276
		621.2	0.00676802
		621.5	0.00669697
		621.8	0.00662978
		622.1	0.00656659
		622.4	0.00650754
		622.7	0.00645275
		623	0.0064023
		623.3	0.00635627
		623.6	0.00631472
		623.9	0.00627766
		624.2	0.0062451
		624.5	0.00621704
		624.8	0.00619343
		625.1	0.00617419
		625.4	0.00615924
		625.7	0.00614848
		626	0.00614176
		626.3	0.00613894
		626.6	0.00613985
		626.9	0.00614428
		627.2	0.00615206
		627.5	0.00616291
		627.8	0.00617662
		628.1	0.00619292
		628.4	0.00621158
		628.7	0.0062323
		629	0.0062548
		629.3	0.00627881
		629.6	0.00630406
		629.9	0.00633023
		630.2	0.00635704
		630.5	0.00638426
		630.8	0.00641154
		631.1	0.00643865
		631.4	0.00646533
		631.7	0.00649134
		632	0.00651643
		632.3	0.00654039
		632.6	0.00656301
		632.9	0.0065841
		633.2	0.00660348
		633.5	0.00662099
		633.8	0.00663648
		634.1	0.00664984
		634.4	0.00666094
		634.7	0.00666969
		635	0.006676
		635.3	0.00667983
		635.6	0.00668111
		635.9	0.0066798
		636.2	0.00667588
		636.5	0.00666933
		636.8	0.00666015
		637.1	0.00664834
		637.4	0.00663389
		637.7	0.00661687
		638	0.00659728
		638.3	0.00657515
		638.6	0.00655051
		638.9	0.00652341
		639.2	0.00649391
		639.5	0.00646205
		639.8	0.00642787
		640.1	0.00639143
		640.4	0.00635279
		640.7	0.006312
		641	0.00626912
		641.3	0.00622421
		641.6	0.00617735
		641.9	0.00612857
		642.2	0.006078
		642.5	0.00602567
		642.8	0.00597168
		643.1	0.0059161
		643.4	0.00585902
		643.7	0.00580051
		644	0.00574071
		644.3	0.00567968
		644.6	0.00561756
		644.9	0.00555446
		645.2	0.00549048
		645.5	0.00542575
		645.8	0.0053604
		646.1	0.00529456
		646.4	0.00522838
		646.7	0.00516197
		647	0.00509552
		647.3	0.00502916
		647.6	0.00496304
		647.9	0.00489732
		648.2	0.00483213
		648.5	0.00476761
		648.8	0.00470395
		649.1	0.00464125
		649.4	0.00457972
		649.7	0.00451941
		650	0.0044605
		650.3	0.0044031
		650.6	0.00434733
		650.9	0.00429328
		651.2	0.00424105
		651.5	0.00419072
		651.8	0.00414235
		652.1	0.00409602
		652.4	0.00405178
		652.7	0.00400965
		653	0.00396965
		653.3	0.00393179
		653.6	0.00389606
		653.9	0.00386245
		654.2	0.00383091
		654.5	0.00380142
		654.8	0.0037739
		655.1	0.0037483
		655.4	0.00372453
		655.7	0.0037025
		656	0.00368212
		656.3	0.00366329
		656.6	0.00364588
		656.9	0.00362979
		657.2	0.00361488
		657.5	0.00360104
		657.8	0.00358812
		658.1	0.00357601
		658.4	0.00356456
		658.7	0.00355366
		659	0.00354317
		659.3	0.00353296
		659.6	0.00352292
		659.9	0.00351293
		660.2	0.00350288
		660.5	0.00349267
		660.8	0.00348221
		661.1	0.00347142
		661.4	0.00346021
		661.7	0.00344853
		662	0.00343631
		662.3	0.00342352
		662.6	0.00341013
		662.9	0.00339609
		663.2	0.00338144
		663.5	0.00336615
		663.8	0.00335024
		664.1	0.00333372
		664.4	0.00331665
		664.7	0.00329907
		665	0.00328102
		665.3	0.00326258
		665.6	0.0032438
		665.9	0.00322477
		666.2	0.00320557
		666.5	0.00318628
		666.8	0.00316696
		667.1	0.00314779
		667.4	0.0031288
		667.7	0.0031101
		668	0.00309175
		668.3	0.0030739
		668.6	0.00305659
		668.9	0.00303991
		669.2	0.00302394
		669.5	0.00300873
		669.8	0.00299435
		670.1	0.00298084
		670.4	0.00296824
		670.7	0.00295658
		671	0.00294586
		671.3	0.0029361
		671.6	0.00292728
		671.9	0.00291938
		672.2	0.00291236
		672.5	0.00290618
		672.8	0.00290078
		673.1	0.00289609
		673.4	0.00289201
		673.7	0.00288848
		674	0.00288539
		674.3	0.00288263
		674.6	0.00288008
		674.9	0.00287762
		675.2	0.00287512
		675.5	0.00287247
		675.8	0.00286952
		676.1	0.00286614
		676.4	0.00286222
		676.7	0.00285761
		677	0.0028522
		677.3	0.00284587
		677.6	0.0028385
		677.9	0.00283
		678.2	0.00282023
		678.5	0.00280918
		678.8	0.00279673
		679.1	0.00278281
		679.4	0.00276736
		679.7	0.00275037
		680	0.00273179
		680.3	0.00271161
		680.6	0.00268981
		680.9	0.0026664
		681.2	0.00264141
		681.5	0.00261485
		681.8	0.00258678
		682.1	0.00255723
		682.4	0.00252628
		682.7	0.00249398
		683	0.00246041
		683.3	0.00242565
		683.6	0.0023898
		683.9	0.00235293
		684.2	0.00231514
		684.5	0.00227653
		684.8	0.00223721
		685.1	0.00219726
		685.4	0.0021568
		685.7	0.00211591
		686	0.00207469
		686.3	0.00203324
		686.6	0.00199163
		686.9	0.00194995
		687.2	0.00190829
		687.5	0.00186672
		687.8	0.00182528
		688.1	0.00178408
		688.4	0.00174316
		688.7	0.00170256
		689	0.00166234
		689.3	0.00162252
		689.6	0.00158316
		689.9	0.00154427
		690.2	0.00150588
		690.5	0.00146801
		690.8	0.00143067
		691.1	0.00139387
		691.4	0.00135763
		691.7	0.00132194
		692	0.00128679
		692.3	0.0012522
		692.6	0.00121816
		692.9	0.00118466
		693.2	0.00115169
		693.5	0.00111924
		693.8	0.00108731
		694.1	0.00105589
		694.4	0.00102496
		694.7	0.000994527
		695	0.000964573
		695.3	0.000935092
		695.6	0.000906078
		695.9	0.000877525
		696.2	0.000849428
		696.5	0.000821784
		696.8	0.00079459
		697.1	0.000767828
		697.4	0.000741534
		697.7	0.000715673
		698	0.00069028
		698.3	0.000665341
		698.6	0.000640857
		698.9	0.000616835
		699.2	0.000593279
		699.5	0.000570193
		699.8	0.000547585
		700.1	0.00052546
		700.4	0.000503824
		700.7	0.000482684
		701	0.000462044
		701.3	0.000441913
		701.6	0.000422293
		701.9	0.000403191
		702.2	0.000384611
		702.5	0.000366557
		702.8	0.000349031
		703.1	0.000332036
		703.4	0.000315574
		703.7	0.000299645
		704	0.000284249
		704.3	0.000269385
		704.6	0.000255051
		704.9	0.000241243
		705.2	0.000227958
		705.5	0.000215191
		705.8	0.000202936
		706.1	0.000191187
		706.4	0.000179936
		706.7	0.000169175
		707	0.000158895
		707.3	0.000149086
		707.6	0.000139739
		707.9	0.000130843
		708.2	0.000122385
		708.5	0.000114355
		708.8	0.00010674
		709.1	9.95277e-05
		709.4	9.27048e-05
		709.7	8.62585e-05
		710	8.01753e-05
		710.3	7.44421e-05
		710.6	6.90297e-05
		710.9	6.39588e-05
		711.2	5.91969e-05
		711.5	5.47306e-05
		711.8	5.05469e-05
		712.1	4.66327e-05
		712.4	4.29752e-05
		712.7	3.95618e-05
		713	3.638e-05
		713.3	3.3418e-05
		713.6	3.06638e-05
		713.9	2.8106e-05
		714.2	2.57336e-05
		714.5	2.35358e-05
		714.8	2.15023e-05
		715.1	1.9623e-05
		715.4	1.78884e-05
		715.7	1.63078e-05
		716	1.48388e-05
		716.3	1.34886e-05
		716.6	1.22494e-05
		716.9	1.11138e-05
		717.2	1.00744e-05
		717.5	9.12478e-06
		717.8	8.25849e-06
		718.1	7.46963e-06
		718.4	6.75265e-06
		718.7	6.10237e-06
		719	5.51397e-06
		719.3	4.98298e-06
		719.6	4.50528e-06
		719.9	4.07707e-06
		720.2	3.69491e-06
		720.5	3.35564e-06
		720.8	3.05644e-06
		721.1	2.77966e-06
		721.4	2.5553e-06
		721.7	2.36407e-06
		722	2.20434e-06
		722.3	2.07476e-06
		722.6	1.97429e-06
		722.9	1.90214e-06
		723.2	1.85779e-06
		723.5	1.84101e-06
		723.8	1.85184e-06
		724.1	1.89059e-06
		724.4	1.95787e-06
		724.7	2.05457e-06
		725	2.16497e-06
		725.3	2.34389e-06
		725.6	2.54168e-06
		725.9	2.77564e-06
		726.2	3.04825e-06
		726.5	3.36237e-06
		726.8	3.72118e-06
		727.1	4.12825e-06
		727.4	4.5875e-06
		727.7	5.12049e-06
		728	5.7007e-06
		728.3	6.34785e-06
		728.6	7.08527e-06
		728.9	7.88578e-06
		729.2	8.77183e-06
		729.5	9.75052e-06
		729.8	1.08294e-05
		730.1	1.20167e-05
		730.4	1.33209e-05
		730.7	1.47513e-05
		731	1.63176e-05
		731.3	1.803e-05
		731.6	1.98992e-05
		731.9	2.19368e-05
		732.2	2.4138e-05
		732.5	2.65508e-05
		732.8	2.91689e-05
		733.1	3.20059e-05
		733.4	3.50758e-05
		733.7	3.83933e-05
		734	4.19733e-05
		734.3	4.58313e-05
		734.6	4.99831e-05
		734.9	5.44451e-05
		735.2	5.92337e-05
		735.5	6.43659e-05
		735.8	6.98587e-05
		736.1	7.57294e-05
		736.4	8.19953e-05
		736.7	8.8674e-05
		737	9.57828e-05
		737.3	0.000103339
		737.6	0.00011136
		737.9	0.000119863
		738.2	0.000128882
		738.5	0.000138401
		738.8	0.00014845
		739.1	0.000159045
		739.4	0.0001702
		739.7	0.00018193
		740	0.000194265
		740.3	0.000207185
		740.6	0.000220715
		740.9	0.000234867
		741.2	0.000249666
		741.5	0.000265088
		741.8	0.000281174
		742.1	0.000297894
		742.4	0.000315268
		742.7	0.000333299
		743	0.000351987
		743.3	0.000371333
		743.6	0.000391333
		743.9	0.000411986
		744.2	0.000433285
		744.5	0.000455225
		744.8	0.000477797
		745.1	0.000500993
		745.4	0.000524801
		745.7	0.000549209
		746	0.000574205
		746.3	0.000599773
		746.6	0.000625898
		746.9	0.000652564
		747.2	0.000679752
		747.5	0.000707443
		747.8	0.00073562
		748.1	0.000764262
		748.4	0.000793348
		748.7	0.000822876
		749	0.000852792
		749.3	0.00088309
		749.6	0.000913749
		749.9	0.000944747
		750.2	0.000976064
		750.5	0.00100768
		750.8	0.00103957
		751.1	0.00107172
		751.4	0.00110411
		751.7	0.00113672
		752	0.00116953
		752.3	0.00120253
		752.6	0.0012357
		752.9	0.00126903
		753.2	0.00130249
		753.5	0.00133609
		753.8	0.0013698
		754.1	0.00140362
		754.4	0.00143753
		754.7	0.00147154
		755	0.00150562
		755.3	0.00153978
		755.6	0.00157402
		755.9	0.00160832
		756.2	0.00164269
		756.5	0.00167713
		756.8	0.00171162
		757.1	0.00174619
		757.4	0.00178082
		757.7	0.00181553
		758	0.00185031
		758.3	0.00188519
		758.6	0.00192014
		758.9	0.00195519
		759.2	0.00199034
		759.5	0.00202561
		759.8	0.00206099
		760.1	0.00209651
		760.4	0.00213218
		760.7	0.002168
		761	0.00220399
		761.3	0.00224017
		761.6	0.00227655
		761.9	0.00231314
		762.2	0.00234996
		762.5	0.00238702
		762.8	0.00242434
		763.1	0.00246194
		763.4	0.00249983
		763.7	0.00253803
		764	0.00257655
		764.3	0.00261541
		764.6	0.00265462
		764.9	0.0026942
		765.2	0.00273416
		765.5	0.0027745
		765.8	0.00281525
		766.1	0.00285641
		766.4	0.00289799
		766.7	0.00293998
		767	0.00298239
		767.3	0.00302522
		767.6	0.00306847
		767.9	0.00311213
		768.2	0.00315619
		768.5	0.00320065
		768.8	0.00324546
		769.1	0.00329063
		769.4	0.0033361
		769.7	0.00338186
		770	0.00342786
		770.3	0.0034741
		770.6	0.00352048
		770.9	0.00356698
		771.2	0.00361354
		771.5	0.00366009
		771.8	0.00370658
		772.1	0.00375293
		772.4	0.00379907
		772.7	0.00384491
		773	0.00389039
		773.3	0.0039354
		773.6	0.00397986
		773.9	0.00402367
		774.2	0.00406674
		774.5	0.00410896
		774.8	0.00415024
		775.1	0.00419047
		775.4	0.00422954
		775.7	0.00426735
		776	0.0043038
		776.3	0.00433877
		776.6	0.00437217
		776.9	0.0044039
		777.2	0.00443385
		777.5	0.00446193
		777.8	0.00448805
		778.1	0.00451211
		778.4	0.00453404
		778.7	0.00455376
		779	0.00457118
		779.3	0.00458626
		779.6	0.00459892
		779.9	0.00460911
		780.2	0.0046168
		780.5	0.00462194
		780.8	0.00462451
		781.1	0.00462448
		781.4	0.00462185
		781.7	0.00461662
		782	0.00460879
		782.3	0.00459838
		782.6	0.00458541
		782.9	0.00456992
		783.2	0.00455195
		783.5	0.00453156
		783.8	0.00450881
		784.1	0.00448376
		784.4	0.0044565
		784.7	0.0044271
		785	0.00439566
		785.3	0.00436228
		785.6	0.00432707
		785.9	0.00429012
		786.2	0.00425157
		786.5	0.00421153
		786.8	0.00417013
		787.1	0.0041275
		787.4	0.00408376
		787.7	0.00403905
		788	0.0039935
		788.3	0.00394725
		788.6	0.00390045
		788.9	0.00385322
		789.2	0.00380569
		789.5	0.003758
		789.8	0.00371029
		790.1	0.00366268
		790.4	0.0036153
		790.7	0.00356827
		791	0.00352172
		791.3	0.00347575
		791.6	0.00343047
		791.9	0.00338599
		792.2	0.00334241
		792.5	0.00329982
		792.8	0.0032583
		793.1	0.00321796
		793.4	0.00317883
		793.7	0.00314097
		794	0.00310449
		794.3	0.00306941
		794.6	0.00303578
		794.9	0.00300364
		795.2	0.00297302
		795.5	0.00294394
		795.8	0.00291642
		796.1	0.00289047
		796.4	0.00286609
		796.7	0.00284328
		797	0.00282202
		797.3	0.00280231
		797.6	0.00278412
		797.9	0.00276742
		798.2	0.00275218
		798.5	0.00273836
		798.8	0.00272592
		799.1	0.0027148
		799.4	0.00270496
		799.7	0.00269634
		800	0.00268888
		800.3	0.00268251
		800.6	0.00267718
		800.9	0.00267281
		801.2	0.00266933
		801.5	0.00266667
		801.8	0.00266475
		802.1	0.00266351
		802.4	0.00266287
		802.7	0.00266275
		803	0.00266307
		803.3	0.00266377
		803.6	0.00266478
		803.9	0.00266602
		804.2	0.00266742
		804.5	0.00266892
		804.8	0.00267044
		805.1	0.00267193
		805.4	0.00267332
		805.7	0.00267457
		806	0.00267561
		806.3	0.00267641
		806.6	0.00267691
		806.9	0.00267708
		807.2	0.00267688
		807.5	0.00267629
		807.8	0.00267527
		808.1	0.0026738
		808.4	0.00267187
		808.7	0.00266947
		809	0.0026666
		809.3	0.00266324
		809.6	0.00265941
		809.9	0.00265512
		810.2	0.00265038
		810.5	0.00264521
		810.8	0.00263963
		811.1	0.00263367
		811.4	0.00262738
		811.7	0.00262076
		812	0.00261386
		812.3	0.00260674
		812.6	0.00259943
		812.9	0.00259199
		813.2	0.00258447
		813.5	0.0025769
		813.8	0.00256936
		814.1	0.00256188
		814.4	0.00255454
		814.7	0.00254737
		815	0.00254044
		815.3	0.0025338
		815.6	0.00252749
		815.9	0.00252158
		816.2	0.00251611
		816.5	0.00251112
		816.8	0.00250664
		817.1	0.00250275
		817.4	0.00249945
		817.7	0.00249677
		818	0.00249477
		818.3	0.00249344
		818.6	0.00249281
		818.9	0.00249288
		819.2	0.00249367
		819.5	0.00249517
		819.8	0.00249737
		820.1	0.00250026
		820.4	0.00250383
		820.7	0.00250804
		821	0.00251288
		821.3	0.0025183
		821.6	0.00252424
		821.9	0.0025307
		822.2	0.00253759
		822.5	0.00254487
		822.8	0.00255246
		823.1	0.00256029
		823.4	0.00256829
		823.7	0.00257642
		824	0.00258455
		824.3	0.00259261
		824.6	0.00260051
		824.9	0.00260818
		825.2	0.00261551
		825.5	0.00262241
		825.8	0.00262879
		826.1	0.00263457
		826.4	0.00263964
		826.7	0.00264391
		827	0.0026473
		827.3	0.00264971
		827.6	0.00265107
		827.9	0.00265128
		828.2	0.00265027
		828.5	0.00264797
		828.8	0.00264431
		829.1	0.00263921
		829.4	0.00263263
		829.7	0.0026245
		830	0.00261478
		830.3	0.00260343
		830.6	0.00259042
		830.9	0.00257571
		831.2	0.00255928
		831.5	0.00254112
		831.8	0.00252123
		832.1	0.00249961
		832.4	0.00247626
		832.7	0.00245121
		833	0.00242447
		833.3	0.00239606
		833.6	0.00236605
		833.9	0.00233446
		834.2	0.00230136
		834.5	0.00226679
		834.8	0.00223081
		835.1	0.0021935
		835.4	0.00215494
		835.7	0.00211519
		836	0.00207434
		836.3	0.00203248
		836.6	0.0019897
		836.9	0.0019461
		837.2	0.00190176
		837.5	0.00185679
		837.8	0.00181128
		838.1	0.00176534
		838.4	0.00171906
		838.7	0.00167256
		839	0.00162594
		839.3	0.00157928
		839.6	0.0015327
		839.9	0.0014863
		840.2	0.00144015
		840.5	0.00139437
		840.8	0.00134904
		841.1	0.00130426
		841.4	0.00126009
		841.7	0.00121664
		842	0.00117397
		842.3	0.00113214
		842.6	0.00109126
		842.9	0.00105138
		843.2	0.00101255
		843.5	0.000974834
		843.8	0.000938284
		844.1	0.000902948
		844.4	0.000868869
		844.7	0.000836086
		845	0.000804632
		845.3	0.000774539
		845.6	0.000745831
		845.9	0.000718529
		846.2	0.000692636
		846.5	0.000668198
		846.8	0.000645206
		847.1	0.000623665
		847.4	0.000603578
		847.7	0.000584943
		848	0.000567755
		848.3	0.000552007
		848.6	0.000537687
		848.9	0.000524783
		849.2	0.000513278
		849.5	0.000503155
		849.8	0.000494392
		850.1	0.000486968
		850.4	0.000480857
		850.7	0.000476034
		851	0.000472471
		851.3	0.00047014
		851.6	0.000469008
		851.9	0.000469046
		852.2	0.00047022
		852.5	0.000472497
		852.8	0.000475842
		853.1	0.000480221
		853.4	0.000485596
		853.7	0.000491932
		854	0.000499192
		854.3	0.000507338
		854.6	0.000516317
		854.9	0.000526122
		855.2	0.000536699
		855.5	0.000548006
		855.8	0.000560006
		856.1	0.000572659
		856.4	0.000585924
		856.7	0.000599761
		857	0.000614131
		857.3	0.000628993
		857.6	0.000644306
		857.9	0.000660029
		858.2	0.000676121
		858.5	0.000692542
		858.8	0.000709249
		859.1	0.000726202
		859.4	0.000743359
		859.7	0.000760679
		860	0.000778121
		860.3	0.000795644
		860.6	0.000813206
		860.9	0.000830765
		861.2	0.000848283
		861.5	0.000865717
		861.8	0.000883027
		862.1	0.000900174
		862.4	0.000917118
		862.7	0.000933821
		863	0.000950242
		863.3	0.000966345
		863.6	0.000982093
		863.9	0.000997449
		864.2	0.00101236
		864.5	0.00102683
		864.8	0.0010408
		865.1	0.00105425
		865.4	0.00106715
		865.7	0.00107945
		866	0.00109113
		866.3	0.00110216
		866.6	0.00111253
		866.9	0.0011222
		867.2	0.00113115
		867.5	0.00113936
		867.8	0.00114682
		868.1	0.0011535
		868.4	0.00115939
		868.7	0.00116448
		869	0.00116876
		869.3	0.00117221
		869.6	0.00117482
		869.9	0.0011766
		870.2	0.00117754
		870.5	0.00117763
		870.8	0.00117689
		871.1	0.00117528
		871.4	0.00117286
		871.7	0.00116963
		872	0.00116556
		872.3	0.00116068
		872.6	0.001155
		872.9	0.00114853
		873.2	0.0011413
		873.5	0.0011333
		873.8	0.00112457
		874.1	0.00111514
		874.4	0.00110502
		874.7	0.00109424
		875	0.00108281
		875.3	0.00107077
		875.6	0.00105813
		875.9	0.00104493
		876.2	0.0010312
		876.5	0.00101696
		876.8	0.00100225
		877.1	0.000987099
		877.4	0.000971533
		877.7	0.000955587
		878	0.000939294
		878.3	0.000922685
		878.6	0.000905793
		878.9	0.000888651
		879.2	0.000871291
		879.5	0.000853746
		879.8	0.000836047
		880.1	0.000818227
		880.4	0.000800318
		880.7	0.000782351
		881	0.000764356
		881.3	0.000746365
		881.6	0.000728406
		881.9	0.000710509
		882.2	0.000692704
		882.5	0.000675017
		882.8	0.000657476
		883.1	0.000640108
		883.4	0.000622939
		883.7	0.000605993
		884	0.000589297
		884.3	0.000572873
		884.6	0.000556744
		884.9	0.000540934
		885.2	0.000525463
		885.5	0.000510354
		885.8	0.000495627
		886.1	0.0004813
		886.4	0.000467395
		886.7	0.000453929
		887	0.000440921
		887.3	0.000428389
		887.6	0.000416349
		887.9	0.000404819
		888.2	0.000393815
		888.5	0.000383352
		888.8	0.000373446
		889.1	0.000364113
		889.4	0.000355367
		889.7	0.000347223
		890	0.000339694
		890.3	0.000332795
		890.6	0.000326538
		890.9	0.000320938
		891.2	0.000316006
		891.5	0.000311755
		891.8	0.000308215
		892.1	0.000305363
		892.4	0.000303227
		892.7	0.000301816
		893	0.000301142
		893.3	0.000301212
		893.6	0.000302037
		893.9	0.000303622
		894.2	0.000305976
		894.5	0.000309104
		894.8	0.000313011
		895.1	0.000317701
		895.4	0.000323177
		895.7	0.000329441
		896	0.000336491
		896.3	0.000344328
		896.6	0.000352947
		896.9	0.000362345
		897.2	0.000372514
		897.5	0.000383447
		897.8	0.000395134
		898.1	0.000407561
		898.4	0.000420716
		898.7	0.000434582
		899	0.00044914
		899.3	0.000464369
		899.6	0.000480246
		899.9	0.000496747
		900.2	0.000513843
		900.5	0.000531504
		900.8	0.000549699
		901.1	0.000568392
		901.4	0.000587548
		901.7	0.000607127
		902	0.000627088
		902.3	0.000647389
		902.6	0.000667985
		902.9	0.000688829
		903.2	0.000709874
		903.5	0.00073107
		903.8	0.000752367
		904.1	0.000773712
		904.4	0.000795053
		904.7	0.000816337
		905	0.00083751
		905.3	0.000858518
		905.6	0.000879324
		905.9	0.000899842
		906.2	0.000920035
		906.5	0.00093985
		906.8	0.000959236
		907.1	0.000978142
		907.4	0.00099652
		907.7	0.00101432
		908	0.00103151
		908.3	0.00104803
		908.6	0.00106385
		908.9	0.00107892
		909.2	0.00109322
		909.5	0.00110672
		909.8	0.00111938
		910.1	0.00113117
		910.4	0.00114209
		910.7	0.0011521
		911	0.00116119
		911.3	0.00116936
		911.6	0.00117659
		911.9	0.00118288
		912.2	0.00118823
		912.5	0.00119264
		912.8	0.00119613
		913.1	0.0011987
		913.4	0.00120036
		913.7	0.00120114
		914	0.00120105
		914.3	0.00120012
		914.6	0.00119837
		914.9	0.00119584
		915.2	0.00119255
		915.5	0.00118854
		915.8	0.00118385
		916.1	0.00117852
		916.4	0.00117256
		916.7	0.00116606
		917	0.00115904
		917.3	0.00115155
		917.6	0.00114362
		917.9	0.0011353
		918.2	0.00112664
		918.5	0.00111768
		918.8	0.00110847
		919.1	0.00109906
		919.4	0.00108948
		919.7	0.00107978
		920	0.00107
		920.3	0.00106019
		920.6	0.00105038
		920.9	0.00104061
		921.2	0.00103092
		921.5	0.00102135
		921.8	0.00101193
		922.1	0.00100269
		922.4	0.000993655
		922.7	0.000984862
		923	0.000976335
		923.3	0.000968097
		923.6	0.00096017
		923.9	0.000952575
		924.2	0.000945329
		924.5	0.000938449
		924.8	0.000931949
		925.1	0.000925842
		925.4	0.000920137
		925.7	0.000914843
		926	0.000909967
		926.3	0.000905514
		926.6	0.000901488
		926.9	0.000897891
		927.2	0.000894722
		927.5	0.000891982
		927.8	0.000889668
		928.1	0.000887776
		928.4	0.000886303
		928.7	0.000885242
		929	0.000884586
		929.3	0.000884329
		929.6	0.000884461
		929.9	0.000884974
		930.2	0.000885858
		930.5	0.000887102
		930.8	0.000888694
		931.1	0.000890624
		931.4	0.00089288
		931.7	0.000895432
		932	0.000898302
		932.3	0.000901458
		932.6	0.000904888
		932.9	0.000908578
		933.2	0.000912513
		933.5	0.00091668
		933.8	0.000921064
		934.1	0.000925651
		934.4	0.000930428
		934.7	0.000935378
		935	0.000940488
		935.3	0.000945743
		935.6	0.000951128
		935.9	0.000956629
		936.2	0.000962232
		936.5	0.00096792
		936.8	0.00097368
		937.1	0.000979497
		937.4	0.000985357
		937.7	0.000991245
		938	0.000997145
		938.3	0.00100304
		938.6	0.00100893
		938.9	0.00101478
		939.2	0.00102059
		939.5	0.00102634
		939.8	0.00103202
		940.1	0.00103761
		940.4	0.0010431
		940.7	0.00104848
		941	0.00105372
		941.3	0.00105883
		941.6	0.00106378
		941.9	0.00106856
		942.2	0.00107316
		942.5	0.00107756
		942.8	0.00108176
		943.1	0.00108574
		943.4	0.00108948
		943.7	0.00109298
		944	0.00109623
		944.3	0.0010992
		944.6	0.0011019
		944.9	0.00110431
		945.2	0.00110641
		945.5	0.00110821
		945.8	0.00110968
		946.1	0.00111084
		946.4	0.00111165
		946.7	0.00111211
		947	0.00111221
		947.3	0.00111195
		947.6	0.00111132
		947.9	0.00111031
		948.2	0.00110891
		948.5	0.00110712
		948.8	0.00110494
		949.1	0.00110236
		949.4	0.00109937
		949.7	0.00109598
		950	0.00109217
		950.3	0.00108795
		950.6	0.00108332
		950.9	0.00107825
		951.2	0.00107279
		951.5	0.00106691
		951.8	0.00106062
		952.1	0.00105391
		952.4	0.00104679
		952.7	0.00103927
		953	0.00103134
		953.3	0.00102301
		953.6	0.00101429
		953.9	0.00100518
		954.2	0.000995697
		954.5	0.000985835
		954.8	0.000975609
		955.1	0.000965027
		955.4	0.000954098
		955.7	0.000942833
		956	0.000931242
		956.3	0.000919337
		956.6	0.00090713
		956.9	0.000894633
		957.2	0.00088186
		957.5	0.000868824
		957.8	0.000855541
		958.1	0.000842023
		958.4	0.000828288
		958.7	0.000814351
		959	0.000800227
		959.3	0.000785933
		959.6	0.000771487
		959.9	0.000756904
		960.2	0.000742203
		960.5	0.000727401
		960.8	0.000712516
		961.1	0.000697566
		961.4	0.000682569
		961.7	0.000667544
		962	0.000652508
		962.3	0.000637479
		962.6	0.000622477
		962.9	0.000607518
		963.2	0.000592622
		963.5	0.000577806
		963.8	0.000563088
		964.1	0.000548486
		964.4	0.000534016
		964.7	0.000519696
		965	0.000505542
		965.3	0.000491572
		965.6	0.000477801
		965.9	0.000464244
		966.2	0.000450918
		966.5	0.000437837
		966.8	0.000425015
		967.1	0.000412467
		967.4	0.000400206
		967.7	0.000388245
		968	0.000376597
		968.3	0.000365273
		968.6	0.000354285
		968.9	0.000343644
		969.2	0.000333361
		969.5	0.000323444
		969.8	0.000313904
		970.1	0.000304749
		970.4	0.000295987
		970.7	0.000287625
		971	0.000279671
		971.3	0.000272131
		971.6	0.000265011
		971.9	0.000258316
		972.2	0.00025205
		972.5	0.000246219
		972.8	0.000240824
		973.1	0.00023587
		973.4	0.000231358
		973.7	0.000227291
		974	0.000223669
		974.3	0.000220494
		974.6	0.000217766
		974.9	0.000215483
		975.2	0.000213664
		975.5	0.000212273
		975.8	0.000211325
		976.1	0.000210817
		976.4	0.000210745
		976.7	0.000211106
		977	0.000211896
		977.3	0.000213111
		977.6	0.000214745
		977.9	0.000216793
		978.2	0.000219248
		978.5	0.000222104
		978.8	0.000225353
		979.1	0.000228988
		979.4	0.000233
		979.7	0.00023738
		980	0.000242104
		980.3	0.000247195
		980.6	0.000252624
		980.9	0.000258381
		981.2	0.000264455
		981.5	0.000270833
		981.8	0.000277503
		982.1	0.000284453
		982.4	0.000291668
		982.7	0.000299136
		983	0.000306841
		983.3	0.00031477
		983.6	0.000322907
		983.9	0.000331236
		984.2	0.000339742
		984.5	0.000348408
		984.8	0.000357218
		985.1	0.000366155
		985.4	0.000375201
		985.7	0.00038434
		986	0.000393553
		986.3	0.000402823
		986.6	0.000412131
		986.9	0.00042146
		987.2	0.000430792
		987.5	0.000440107
		987.8	0.000449388
		988.1	0.000458617
		988.4	0.000467776
		988.7	0.000476846
		989	0.00048581
		989.3	0.000494651
		989.6	0.000503352
		989.9	0.000511894
		990.2	0.000520264
		990.5	0.000528443
		990.8	0.000536417
		991.1	0.000544172
		991.4	0.000551691
		991.7	0.000558963
		992	0.000565974
		992.3	0.000572712
		992.6	0.000579165
		992.9	0.000585323
		993.2	0.000591176
		993.5	0.0005967
		993.8	0.000601921
		994.1	0.000606813
		994.4	0.000611371
		994.7	0.00061559
		995	0.000619467
		995.3	0.000622998
		995.6	0.000626183
		995.9	0.000629022
		996.2	0.000631514
		996.5	0.000633662
		996.8	0.000635469
		997.1	0.000636939
		997.4	0.000638077
		997.7	0.00063889
		998	0.000639385
		998.3	0.000639571
		998.6	0.000639457
		998.9	0.000639053
		999.2	0.000638373
		999.5	0.000637427
		999.8	0.000636229
		1000.1	0.000634793
		1000.4	0.000633135
		1000.7	0.00063127
		1001	0.000629214
		1001.3	0.000626985
		1001.6	0.000624599
		1001.9	0.000622075
		1002.2	0.000619432
		1002.5	0.000616687
		1002.8	0.00061386
		1003.1	0.000610969
		1003.4	0.000608035
		1003.7	0.000605076
		1004	0.000602111
		1004.3	0.00059916
		1004.6	0.00059624
		1004.9	0.000593355
		1005.2	0.000590557
		1005.5	0.000587844
		1005.8	0.000585235
		1006.1	0.000582745
		1006.4	0.00058039
		1006.7	0.000578186
		1007	0.000576145
		1007.3	0.000574282
		1007.6	0.000572609
		1007.9	0.000571137
		1008.2	0.000569876
		1008.5	0.000568836
		1008.8	0.000568024
		1009.1	0.000567447
		1009.4	0.00056711
		1009.7	0.000567019
		1010	0.000567175
		1010.3	0.000567581
		1010.6	0.000568236
		1010.9	0.00056914
		1011.2	0.000570291
		1011.5	0.000571685
		1011.8	0.000573316
		1012.1	0.00057518
		1012.4	0.000577268
		1012.7	0.000579571
		1013	0.00058208
		1013.3	0.000584783
		1013.6	0.000587669
		1013.9	0.000590724
		1014.2	0.000593934
		1014.5	0.000597284
		1014.8	0.000600756
		1015.1	0.000604335
		1015.4	0.000608003
		1015.7	0.00061174
		1016	0.000615529
		1016.3	0.000619349
		1016.6	0.00062318
		1016.9	0.000627003
		1017.2	0.000630795
		1017.5	0.000634537
		1017.8	0.000638207
		1018.1	0.000641785
		1018.4	0.000645249
		1018.7	0.000648579
		1019	0.000651754
		1019.3	0.000654754
		1019.6	0.00065756
		1019.9	0.000660151
		1020.2	0.000662509
		1020.5	0.000664617
		1020.8	0.000666456
		1021.1	0.000668011
		1021.4	0.000669265
		1021.7	0.000670204
		1022	0.000670815
		1022.3	0.000671084
		1022.6	0.000671
		1022.9	0.000670552
		1023.2	0.000669731
		1023.5	0.000668529
		1023.8	0.000666939
		1024.1	0.000664955
		1024.4	0.000662572
		1024.7	0.000659789
		1025	0.000656601
		1025.3	0.00065301
		1025.6	0.000649016
		1025.9	0.00064462
		1026.2	0.000639826
		1026.5	0.000634638
		1026.8	0.000629061
		1027.1	0.000623102
		1027.4	0.000616769
		1027.7	0.00061007
		1028	0.000603016
		1028.3	0.000595618
		1028.6	0.000587886
		1028.9	0.000579834
		1029.2	0.000571475
		1029.5	0.000562824
		1029.8	0.000553894
		1030.1	0.000544702
		1030.4	0.000535263
		1030.7	0.000525594
		1031	0.000515713
		1031.3	0.000505635
		1031.6	0.000495379
		1031.9	0.000484963
		1032.2	0.000474404
		1032.5	0.00046372
		1032.8	0.00045293
		1033.1	0.000442051
		1033.4	0.000431102
		1033.7	0.000420099
		1034	0.000409061
		1034.3	0.000398004
		1034.6	0.000386946
		1034.9	0.000375903
		1035.2	0.00036489
		1035.5	0.000353925
		1035.8	0.00034302
		1036.1	0.000332192
		1036.4	0.000321454
		1036.7	0.00031082
		1037	0.000300301
		1037.3	0.000289911
		1037.6	0.00027966
		1037.9	0.00026956
		1038.2	0.00025962
		1038.5	0.00024985
		1038.8	0.000240257
		1039.1	0.000230851
		1039.4	0.000221639
		1039.7	0.000212625
		1040	0.000203817
		1040.3	0.00019522
		1040.6	0.000186838
		1040.9	0.000178673
		1041.2	0.000170731
		1041.5	0.000163012
		1041.8	0.000155519
		1042.1	0.000148253
		1042.4	0.000141215
		1042.7	0.000134403
		1043	0.000127819
		1043.3	0.000121462
		1043.6	0.000115328
		1043.9	0.000109418
		1044.2	0.000103728
		1044.5	9.8256e-05
		1044.8	9.29987e-05
		1045.1	8.79528e-05
		1045.4	8.31146e-05
		1045.7	7.84801e-05
		1046	7.40452e-05
		1046.3	6.98054e-05
		1046.6	6.57561e-05
		1046.9	6.18924e-05
		1047.2	5.82094e-05
		1047.5	5.46854e-05
		1047.8	5.13505e-05
		1048.1	4.81806e-05
		1048.4	4.51703e-05
		1048.7	4.23144e-05
		1049	3.96076e-05
		1049.3	3.70443e-05
		1049.6	3.46194e-05
		1049.9	3.23274e-05
		1050.2	3.01631e-05
		1050.5	2.81213e-05
		1050.8	2.61969e-05
		1051.1	2.43847e-05
		1051.4	2.26798e-05
		1051.7	2.10773e-05
		1052	1.95725e-05
		1052.3	1.81606e-05
		1052.6	1.68371e-05
		1052.9	1.55977e-05
		1053.2	1.4438e-05
		1053.5	1.33538e-05
		1053.8	1.23413e-05
		1054.1	1.13964e-05
		1054.4	1.05155e-05
		1054.7	9.69501e-06
		1055	8.93138e-06
		1055.3	8.22135e-06
		1055.6	7.56174e-06
		1055.9	6.94952e-06
		1056.2	6.38178e-06
		1056.5	5.85575e-06
		1056.8	5.3688e-06
		1057.1	4.91843e-06
		1057.4	4.50225e-06
		1057.7	4.118e-06
		1058	3.76355e-06
		1058.3	3.43687e-06
		1058.6	3.13604e-06
		1058.9	2.85927e-06
		1059.2	2.60485e-06
		1059.5	2.37118e-06
		1059.8	2.15675e-06
		1060.1	1.96015e-06
		1060.4	1.78005e-06
		1060.7	1.61521e-06
		1061	1.46447e-06
		1061.3	1.32675e-06
		1061.6	1.20101e-06
		1061.9	1.08633e-06
		1062.2	9.81814e-07
		1062.5	8.86648e-07
		1062.8	8.00068e-07
		1063.1	7.21368e-07
		1063.4	6.49892e-07
		1063.7	5.85032e-07
		1064	5.26225e-07
		1064.3	4.72953e-07
		1064.6	4.24735e-07
		1064.9	3.8113e-07
		1065.2	3.41729e-07
		1065.5	3.06157e-07
		1065.8	2.74069e-07
		1066.1	2.45149e-07
		1066.4	2.19107e-07
		1066.7	1.95675e-07
		1067	1.74609e-07
		1067.3	1.55688e-07
		1067.6	1.38706e-07
		1067.9	1.23478e-07
		1068.2	1.09835e-07
		1068.5	9.76207e-08
		1068.8	8.6696e-08
		1069.1	7.69326e-08
		1069.4	6.82143e-08
		1069.7	6.04359e-08
		1070	5.35018e-08
		1070.3	4.73256e-08
		1070.6	4.1829e-08
		1070.9	3.69414e-08
		1071.2	3.25989e-08
		1071.5	2.87439e-08
		1071.8	2.53247e-08
		1072.1	2.22944e-08
		1072.4	1.96111e-08
		1072.7	1.7237e-08
		1073	0
		1073.3	0
		1073.6	0
		1073.9	0
		1074.2	0
		1074.5	0
		1074.8	0
		1075.1	0
		1075.4	0
		1075.7	0
		1076	0
		1076.3	0
		1076.6	0
		1076.9	0
		1077.2	0
		1077.5	0
		1077.8	0
		1078.1	0
		1078.4	0
		1078.7	0
		1079	0
		1079.3	0
		1079.6	0
		1079.9	0
		1080.2	0
		1080.5	0
		1080.8	0
		1081.1	0
		1081.4	0
		1081.7	0
		1082	0
		1082.3	0
		1082.6	0
		1082.9	0
		1083.2	0
		1083.5	0
		1083.8	0
		1084.1	0
		1084.4	0
		1084.7	0
		1085	0
		1085.3	0
		1085.6	0
		1085.9	0
		1086.2	0
		1086.5	0
		1086.8	0
		1087.1	0
		1087.4	0
		1087.7	0
		1088	0
		1088.3	0
		1088.6	0
		1088.9	0
		1089.2	0
		1089.5	0
		1089.8	0
		1090.1	0
		1090.4	0
		1090.7	0
		1091	0
		1091.3	0
		1091.6	0
		1091.9	0
		1092.2	0
		1092.5	0
		1092.8	0
		1093.1	0
		1093.4	0
		1093.7	0
		1094	0
		1094.3	0
		1094.6	0
		1094.9	0
		1095.2	0
		1095.5	0
		1095.8	0
		1096.1	0
		1096.4	0
		1096.7	0
		1097	0
		1097.3	0
		1097.6	0
		1097.9	0
		1098.2	0
		1098.5	0
		1098.8	0
		1099.1	0
		1099.4	0
		1099.7	0
[truncated: 1 more rows]

## Sheet: PlotDat5
Source sheet	UAE Reporting table	500	0	524	0	500	0
Plot name	ProbDens5	500.12	0	536	0	739.88	0
Plot Type	16	500.24	0	536	2
1st free col	9	500.36	0	524	2
Sigma Level	2	500.48	0	524	0
Absolute Errs	TRUE	500.6	0	ErrBox	ErrBox
Symbol Type	1	500.72	0	536	0
Inverse Plot	FALSE	500.84	0	548	0
Color Plot	TRUE	500.96	0	548	2
3D plot	FALSE	501.08	0	536	2
Linear	FALSE	501.2	0	536	0
Data Range	AC354:AD405	501.32	0	ErrBox	ErrBox
Filled Symbols	TRUE	501.44	0	548	0
ConcAge	FALSE	501.56	0	560	0
ConcSwap	FALSE	501.68	0	560	1
1st Symbol-row	1	501.8	0	548	1
		501.92	0	548	0
		502.04	0	ErrBox	ErrBox
		502.16	2.00409e-08	560	0
		502.28	2.2097e-08	572	0
		502.4	2.43536e-08	572	3
		502.52	2.68291e-08	560	3
		502.64	2.95434e-08	560	0
		502.76	3.25183e-08	ErrBox	ErrBox
		502.88	3.57774e-08	572	0
		503	3.9346e-08	584	0
		503.12	4.3252e-08	584	4
		503.24	4.75252e-08	572	4
		503.36	5.2198e-08	572	0
		503.48	5.73056e-08	ErrBox	ErrBox
		503.6	6.28858e-08	584	0
		503.72	6.89796e-08	596	0
		503.84	7.56313e-08	596	2
		503.96	8.28886e-08	584	2
		504.08	1.11092e-07	584	0
		504.2	1.21285e-07	ErrBox	ErrBox
		504.32	1.32365e-07	596	0
		504.44	1.44405e-07	608	0
		504.56	1.57483e-07	608	3
		504.68	1.71683e-07	596	3
		504.8	1.87095e-07	596	0
		504.92	2.03815e-07	ErrBox	ErrBox
		505.04	2.21947e-07	608	0
		505.16	2.41602e-07	620	0
		505.28	2.629e-07	620	8
		505.4	2.85969e-07	608	8
		505.52	3.10945e-07	608	0
		505.64	3.37975e-07	ErrBox	ErrBox
		505.76	3.67216e-07	620	0
		505.88	3.98836e-07	632	0
		506	4.33014e-07	632	6
		506.12	4.69941e-07	620	6
		506.24	5.09822e-07	620	0
		506.36	5.52876e-07	ErrBox	ErrBox
		506.48	5.99335e-07	632	0
		506.6	6.49447e-07	644	0
		506.72	7.03477e-07	644	9
		506.84	7.61707e-07	632	9
		506.96	8.24436e-07	632	0
		507.08	9.11317e-07	ErrBox	ErrBox
		507.2	9.86073e-07	644	0
		507.32	1.06655e-06	656	0
		507.44	1.15316e-06	656	6
		507.56	1.24632e-06	644	6
		507.68	1.34649e-06	644	0
		507.8	1.45416e-06	ErrBox	ErrBox
		507.92	1.56982e-06	656	0
		508.04	1.69403e-06	668	0
		508.16	1.82736e-06	668	2
		508.28	1.97043e-06	656	2
		508.4	2.12387e-06	656	0
		508.52	2.28837e-06	ErrBox	ErrBox
		508.64	2.46465e-06	668	0
		508.76	2.65348e-06	680	0
		508.88	2.85567e-06	680	1
		509	3.07206e-06	668	1
		509.12	3.30356e-06	668	0
		509.24	3.55112e-06	ErrBox	ErrBox
		509.36	3.81573e-06	680	0
		509.48	4.09846e-06	692	0
		509.6	4.40042e-06	692	1
		509.72	4.72277e-06	680	1
		509.84	5.06674e-06	680	0
		509.96	5.43364e-06	ErrBox	ErrBox
		510.08	5.82481e-06	704	0
		510.2	6.24169e-06	716	0
		510.32	6.68577e-06	716	2
		510.44	7.15864e-06	704	2
		510.56	7.66193e-06	704	0
		510.68	8.19738e-06	ErrBox	ErrBox
		510.8	8.76679e-06
		510.92	9.37206e-06
		511.04	1.00152e-05
		511.16	1.06982e-05
		511.28	1.14233e-05
		511.4	1.21927e-05
		511.52	1.30088e-05
		511.64	1.38741e-05
		511.76	1.4791e-05
		511.88	1.57624e-05
		512	1.67909e-05
		512.12	1.78795e-05
		512.24	1.90311e-05
		512.36	2.02489e-05
		512.48	2.15361e-05
		512.6	2.28962e-05
		512.72	2.43325e-05
		512.84	2.58487e-05
		512.96	2.74485e-05
		513.08	2.91359e-05
		513.2	3.09148e-05
		513.32	3.27893e-05
		513.44	3.47639e-05
		513.56	3.68428e-05
		513.68	3.90307e-05
		513.8	4.13322e-05
		513.92	4.37522e-05
		514.04	4.62956e-05
		514.16	4.89677e-05
		514.28	5.17736e-05
		514.4	5.47188e-05
		514.52	5.78088e-05
		514.64	6.10493e-05
		514.76	6.44462e-05
		514.88	6.80055e-05
		515	7.17332e-05
		515.12	7.56356e-05
		515.24	7.9719e-05
		515.36	8.39901e-05
		515.48	8.84554e-05
		515.6	9.31217e-05
		515.72	9.79959e-05
		515.84	0.000103085
		515.96	0.000108396
		516.08	0.000113936
		516.2	0.000119713
		516.32	0.000125734
		516.44	0.000132006
		516.56	0.000138538
		516.68	0.000145336
		516.8	0.000152409
		516.92	0.000159764
		517.04	0.000167409
		517.16	0.000175352
		517.28	0.000183601
		517.4	0.000192164
		517.52	0.000201048
		517.64	0.000210263
		517.76	0.000219815
		517.88	0.000229713
		518	0.000239964
		518.12	0.000250576
		518.24	0.000261558
		518.36	0.000272916
		518.48	0.000284658
		518.6	0.000296792
		518.72	0.000309325
		518.84	0.000322265
		518.96	0.000335618
		519.08	0.000349391
		519.2	0.000363591
		519.32	0.000378225
		519.44	0.000393298
		519.56	0.000408818
		519.68	0.000424788
		519.8	0.000441216
		519.92	0.000458106
		520.04	0.000475464
		520.16	0.000493293
		520.28	0.000511598
		520.4	0.000530383
		520.52	0.000549671
		520.64	0.000569428
		520.76	0.000589675
		520.88	0.000610413
		521	0.000631644
		521.12	0.00065337
		521.24	0.000675592
		521.36	0.00069831
		521.48	0.000721524
		521.6	0.000745233
		521.72	0.000769436
		521.84	0.000794131
		521.96	0.000819315
		522.08	0.000844987
		522.2	0.000871142
		522.32	0.000897776
		522.44	0.000924884
		522.56	0.000952462
		522.68	0.000980502
		522.8	0.001009
		522.92	0.00103794
		523.04	0.00106733
		523.16	0.00109715
		523.28	0.00112739
		523.4	0.00115804
		523.52	0.0011891
		523.64	0.00122054
		523.76	0.00125236
		523.88	0.00128455
		524	0.0013171
		524.12	0.00134997
		524.24	0.00138318
		524.36	0.00141669
		524.48	0.00145049
		524.6	0.00148457
		524.72	0.0015189
		524.84	0.00155348
		524.96	0.00158827
		525.08	0.00162327
		525.2	0.00165845
		525.32	0.00169379
		525.44	0.00172927
		525.56	0.00176487
		525.68	0.00180057
		525.8	0.00183635
		525.92	0.00187217
		526.04	0.00190803
		526.16	0.00194389
		526.28	0.00197974
		526.4	0.00201556
		526.52	0.0020513
		526.64	0.00208694
		526.76	0.00212247
		526.88	0.00215786
		527	0.00219308
		527.12	0.00222811
		527.24	0.00226292
		527.36	0.00229748
		527.48	0.00233178
		527.6	0.00236578
		527.72	0.00239945
		527.84	0.00243278
		527.96	0.00246574
		528.08	0.0024983
		528.2	0.00253044
		528.32	0.00256213
		528.44	0.00259335
		528.56	0.00262407
		528.68	0.00265427
		528.8	0.00268392
		528.92	0.00271302
		529.04	0.00274152
		529.16	0.00276941
		529.28	0.00279667
		529.4	0.00282327
		529.52	0.00284921
		529.64	0.00287445
		529.76	0.00289898
		529.88	0.00292278
		530	0.00294584
		530.12	0.00296813
		530.24	0.00298965
		530.36	0.00301038
		530.48	0.0030303
		530.6	0.0030494
		530.72	0.00306767
		530.84	0.0030851
		530.96	0.00310168
		531.08	0.00311741
		531.2	0.00313227
		531.32	0.00314625
		531.44	0.00315936
		531.56	0.00317159
		531.68	0.00318293
		531.8	0.00319338
		531.92	0.00320294
		532.04	0.00321162
		532.16	0.00321941
		532.28	0.00322631
		532.4	0.00323234
		532.52	0.00323749
		532.64	0.00324177
		532.76	0.00324518
		532.88	0.00324775
		533	0.00324946
		533.12	0.00325034
		533.24	0.0032504
		533.36	0.00324965
		533.48	0.0032481
		533.6	0.00324576
		533.72	0.00324266
		533.84	0.00323881
		533.96	0.00323422
		534.08	0.00322892
		534.2	0.00322292
		534.32	0.00321624
		534.44	0.00320891
		534.56	0.00320094
		534.68	0.00319237
		534.8	0.0031832
		534.92	0.00317347
		535.04	0.0031632
		535.16	0.00315241
		535.28	0.00314113
		535.4	0.00312938
		535.52	0.0031172
		535.64	0.00310461
		535.76	0.00309162
		535.88	0.00307829
		536	0.00306462
		536.12	0.00305064
		536.24	0.0030364
		536.36	0.0030219
		536.48	0.00300719
		536.6	0.00299229
		536.72	0.00297724
		536.84	0.00296204
		536.96	0.00294673
		537.08	0.00293134
		537.2	0.0029159
		537.32	0.00290043
		537.44	0.00288497
		537.56	0.00286953
		537.68	0.00285414
		537.8	0.00283885
		537.92	0.00282365
		538.04	0.00280858
		538.16	0.00279365
		538.28	0.00277891
		538.4	0.00276435
		538.52	0.00275002
		538.64	0.00273593
		538.76	0.0027221
		538.88	0.00270855
		539	0.0026953
		539.12	0.00268237
		539.24	0.00266977
		539.36	0.00265752
		539.48	0.00264564
		539.6	0.00263414
		539.72	0.00262303
		539.84	0.00261233
		539.96	0.00260204
		540.08	0.00259219
		540.2	0.00258277
		540.32	0.0025738
		540.44	0.00256528
		540.56	0.00255723
		540.68	0.00254964
		540.8	0.00254253
		540.92	0.00253589
		541.04	0.00252972
		541.16	0.00252404
		541.28	0.00251884
		541.4	0.00251412
		541.52	0.00250988
		541.64	0.00250611
		541.76	0.00250282
		541.88	0.00250001
		542	0.00249765
		542.12	0.00249578
		542.24	0.00249434
		542.36	0.00249335
		542.48	0.0024928
		542.6	0.00249267
		542.72	0.00249297
		542.84	0.00249368
		542.96	0.00249479
		543.08	0.00249628
		543.2	0.00249815
		543.32	0.00250038
		543.44	0.00250297
		543.56	0.00250588
		543.68	0.00250912
		543.8	0.00251267
		543.92	0.0025165
		544.04	0.00252062
		544.16	0.00252499
		544.28	0.0025296
		544.4	0.00253444
		544.52	0.00253949
		544.64	0.00254474
		544.76	0.00255016
		544.88	0.00255574
		545	0.00256146
		545.12	0.0025673
		545.24	0.00257325
		545.36	0.00257929
		545.48	0.0025854
		545.6	0.00259157
		545.72	0.00259779
		545.84	0.00260401
		545.96	0.00261024
		546.08	0.00261645
		546.2	0.00262263
		546.32	0.00262877
		546.44	0.00263486
		546.56	0.00264086
		546.68	0.00264677
		546.8	0.00265256
		546.92	0.00265824
		547.04	0.00266378
		547.16	0.00266917
		547.28	0.00267439
		547.4	0.00267944
		547.52	0.0026843
		547.64	0.00268899
		547.76	0.00269344
		547.88	0.00269768
		548	0.00270168
		548.12	0.00270545
		548.24	0.00270897
		548.36	0.00271223
		548.48	0.00271523
		548.6	0.00271796
		548.72	0.00272041
		548.84	0.00272258
		548.96	0.00272447
		549.08	0.00272607
		549.2	0.00272738
		549.32	0.00272839
		549.44	0.00272912
		549.56	0.00272954
		549.68	0.00272967
		549.8	0.00272949
		549.92	0.00272902
		550.04	0.00272825
		550.16	0.00272719
		550.28	0.00272585
		550.4	0.00272422
		550.52	0.00272231
		550.64	0.00272012
		550.76	0.00271767
		550.88	0.00271496
		551	0.00271199
		551.12	0.00270877
		551.24	0.00270532
		551.36	0.00270164
		551.48	0.00269774
		551.6	0.00269364
		551.72	0.00268934
		551.84	0.00268485
		551.96	0.0026802
		552.08	0.00267538
		552.2	0.00267042
		552.32	0.00266533
		552.44	0.00266013
		552.56	0.00265482
		552.68	0.00264942
		552.8	0.00264396
		552.92	0.00263844
		553.04	0.00263288
		553.16	0.0026273
		553.28	0.00262172
		553.4	0.00261616
		553.52	0.00261063
		553.64	0.00260515
		553.76	0.00259974
		553.88	0.00259442
		554	0.00258921
		554.12	0.00258412
		554.24	0.00257918
		554.36	0.00257441
		554.48	0.00256982
		554.6	0.00256544
		554.72	0.00256128
		554.84	0.00255737
		554.96	0.00255372
		555.08	0.00255035
		555.2	0.00254729
		555.32	0.00254455
		555.44	0.00254214
		555.56	0.0025401
		555.68	0.00253844
		555.8	0.00253717
		555.92	0.00253632
		556.04	0.0025359
		556.16	0.00253593
		556.28	0.00253643
		556.4	0.00253741
		556.52	0.0025389
		556.64	0.0025409
		556.76	0.00254341
		556.88	0.00254649
		557	0.00255013
		557.12	0.00255434
		557.24	0.00255915
		557.36	0.00256455
		557.48	0.00257056
		557.6	0.0025772
		557.72	0.00258447
		557.84	0.00259239
		557.96	0.00260096
		558.08	0.00261019
		558.2	0.00262009
		558.32	0.00263067
		558.44	0.00264193
		558.56	0.00265388
		558.68	0.00266652
		558.8	0.00267986
		558.92	0.0026939
		559.04	0.00270864
		559.16	0.00272409
		559.28	0.00274024
		559.4	0.00275709
		559.52	0.00277465
		559.64	0.00279291
		559.76	0.00281186
		559.88	0.00283151
		560	0.00285185
		560.12	0.00287286
		560.24	0.00289457
		560.36	0.00291695
		560.48	0.00293999
		560.6	0.0029637
		560.72	0.00298804
		560.84	0.00301303
		560.96	0.00303864
		561.08	0.00306487
		561.2	0.00309171
		561.32	0.00311913
		561.44	0.00314714
		561.56	0.0031757
		561.68	0.00320482
		561.8	0.00323447
		561.92	0.00326464
		562.04	0.00329532
		562.16	0.00332647
		562.28	0.0033581
		562.4	0.00339018
		562.52	0.0034227
		562.64	0.00345563
		562.76	0.00348895
		562.88	0.00352265
		563	0.00355671
		563.12	0.00359111
		563.24	0.00362583
		563.36	0.00366084
		563.48	0.00369615
		563.6	0.0037317
		563.72	0.00376751
		563.84	0.00380351
		563.96	0.00383971
		564.08	0.00387608
		564.2	0.00391261
		564.32	0.00394927
		564.44	0.00398603
		564.56	0.00402289
		564.68	0.00405982
		564.8	0.00409679
		564.92	0.0041338
		565.04	0.00417081
		565.16	0.0042078
		565.28	0.00424477
		565.4	0.00428168
		565.52	0.00431852
		565.64	0.00435526
		565.76	0.0043919
		565.88	0.0044284
		566	0.00446475
		566.12	0.00450094
		566.24	0.00453694
		566.36	0.00457273
		566.48	0.00460833
		566.6	0.00464367
		566.72	0.00467875
		566.84	0.00471356
		566.96	0.00474808
		567.08	0.00478229
		567.2	0.00481619
		567.32	0.00484976
		567.44	0.00488297
		567.56	0.00491582
		567.68	0.00494829
		567.8	0.00498037
		567.92	0.00501204
		568.04	0.0050433
		568.16	0.00507413
		568.28	0.00510451
		568.4	0.00513444
		568.52	0.0051639
		568.64	0.00519288
		568.76	0.00522137
		568.88	0.00524936
		569	0.00527685
		569.12	0.00530381
		569.24	0.00533024
		569.36	0.00535613
		569.48	0.00538148
		569.6	0.00540626
		569.72	0.00543048
		569.84	0.00545412
		569.96	0.00547718
		570.08	0.00549965
		570.2	0.00552152
		570.32	0.00554278
		570.44	0.00556343
		570.56	0.00558345
		570.68	0.00560285
		570.8	0.00562162
		570.92	0.00563974
		571.04	0.00565722
		571.16	0.00567404
		571.28	0.0056902
		571.4	0.0057057
		571.52	0.00572053
		571.64	0.00573468
		571.76	0.00574816
		571.88	0.00576094
		572	0.00577304
		572.12	0.00578444
		572.24	0.00579514
		572.36	0.00580514
		572.48	0.00581443
		572.6	0.00582301
		572.72	0.00583087
		572.84	0.00583801
		572.96	0.00584444
		573.08	0.00585014
		573.2	0.00585511
		573.32	0.00585935
		573.44	0.00586286
		573.56	0.00586563
		573.68	0.00586767
		573.8	0.00586897
		573.92	0.00586953
		574.04	0.00586934
		574.16	0.00586842
		574.28	0.00586676
		574.4	0.00586436
		574.52	0.00586122
		574.64	0.00585734
		574.76	0.00585273
		574.88	0.00584737
		575	0.00584128
		575.12	0.00583446
		575.24	0.00582691
		575.36	0.00581863
		575.48	0.00580962
		575.6	0.00579989
		575.72	0.00578947
		575.84	0.00577831
		575.96	0.00576647
		576.08	0.00575391
		576.2	0.00574066
		576.32	0.00572672
		576.44	0.00571209
		576.56	0.0056968
		576.68	0.00568084
		576.8	0.00566422
		576.92	0.00564696
		577.04	0.00562908
		577.16	0.00561056
		577.28	0.00559142
		577.4	0.00557168
		577.52	0.00555135
		577.64	0.00553044
		577.76	0.00550897
		577.88	0.00548694
		578	0.00546438
		578.12	0.0054413
		578.24	0.00541771
		578.36	0.00539363
		578.48	0.00536908
		578.6	0.00534409
		578.72	0.00531865
		578.84	0.00529279
		578.96	0.00526653
		579.08	0.00523988
		579.2	0.00521288
		579.32	0.00518553
		579.44	0.00515786
		579.56	0.00512989
		579.68	0.00510165
		579.8	0.00507315
		579.92	0.00504442
		580.04	0.00501548
		580.16	0.00498637
		580.28	0.00495708
		580.4	0.00492765
		580.52	0.0048981
		580.64	0.00486849
		580.76	0.00483879
		580.88	0.00480907
		581	0.00477931
		581.12	0.00474957
		581.24	0.00471986
		581.36	0.00469021
		581.48	0.00466064
		581.6	0.00463117
		581.72	0.00460185
		581.84	0.00457269
		581.96	0.00454373
		582.08	0.00451497
		582.2	0.00448645
		582.32	0.0044582
		582.44	0.00443023
		582.56	0.00440257
		582.68	0.00437525
		582.8	0.00434829
		582.92	0.00432172
		583.04	0.00429555
		583.16	0.00426981
		583.28	0.00424453
		583.4	0.00421972
		583.52	0.0041954
		583.64	0.0041716
		583.76	0.00414835
		583.88	0.00412564
		584	0.00410352
		584.12	0.00408199
		584.24	0.00406107
		584.36	0.00404079
		584.48	0.00402115
		584.6	0.00400217
		584.72	0.00398388
		584.84	0.00396627
		584.96	0.00394937
		585.08	0.00393319
		585.2	0.00391774
		585.32	0.00390304
		585.44	0.00388908
		585.56	0.00387589
		585.68	0.00386346
		585.8	0.00385183
		585.92	0.00384097
		586.04	0.00383089
		586.16	0.00382161
		586.28	0.00381313
		586.4	0.00380544
		586.52	0.00379856
		586.64	0.00379249
		586.76	0.00378722
		586.88	0.00378275
		587	0.00377908
		587.12	0.00377622
		587.24	0.00377415
		587.36	0.00377287
		587.48	0.00377237
		587.6	0.00377266
		587.72	0.00377373
		587.84	0.00377556
		587.96	0.00377815
		588.08	0.00378151
		588.2	0.00378559
		588.32	0.0037904
		588.44	0.00379593
		588.56	0.00380216
		588.68	0.0038091
		588.8	0.00381671
		588.92	0.003825
		589.04	0.00383393
		589.16	0.00384351
		589.28	0.00385372
		589.4	0.00386454
		589.52	0.00387595
		589.64	0.00388794
		589.76	0.0039005
		589.88	0.0039136
		590	0.00392723
		590.12	0.00394138
		590.24	0.00395603
		590.36	0.00397115
		590.48	0.00398676
		590.6	0.0040028
		590.72	0.00401926
		590.84	0.00403614
		590.96	0.00405341
		591.08	0.00407109
		591.2	0.00408911
		591.32	0.00410747
		591.44	0.00412617
		591.56	0.00414519
		591.68	0.0041645
		591.8	0.0041841
		591.92	0.00420399
		592.04	0.00422412
		592.16	0.0042445
		592.28	0.00426511
		592.4	0.00428598
		592.52	0.00430702
		592.64	0.00432823
		592.76	0.00434966
		592.88	0.00437126
		593	0.00439302
		593.12	0.00441495
		593.24	0.00443703
		593.36	0.00445925
		593.48	0.00448161
		593.6	0.00450409
		593.72	0.00452671
		593.84	0.00454945
		593.96	0.00457231
		594.08	0.00459529
		594.2	0.00461838
		594.32	0.00464159
		594.44	0.00466491
		594.56	0.00468834
		594.68	0.0047119
		594.8	0.00473557
		594.92	0.00475936
		595.04	0.00478327
		595.16	0.00480732
		595.28	0.00483149
		595.4	0.00485581
		595.52	0.00488027
		595.64	0.00490488
		595.76	0.00492966
		595.88	0.0049546
		596	0.00497972
		596.12	0.00500502
		596.24	0.00503051
		596.36	0.00505621
		596.48	0.00508213
		596.6	0.00510827
		596.72	0.00513465
		596.84	0.00516128
		596.96	0.00518816
		597.08	0.00521532
		597.2	0.00524276
		597.32	0.00527049
		597.44	0.00529854
		597.56	0.00532692
		597.68	0.00535562
		597.8	0.00538466
		597.92	0.00541405
		598.04	0.00544381
		598.16	0.00547396
		598.28	0.00550451
		598.4	0.00553545
		598.52	0.00556681
		598.64	0.0055986
		598.76	0.00563082
		598.88	0.00566349
		599	0.00569661
		599.12	0.00573019
		599.24	0.00576423
		599.36	0.00579877
		599.48	0.0058338
		599.6	0.00586932
		599.72	0.00590533
		599.84	0.00594186
		599.96	0.00597889
		600.08	0.00601643
		600.2	0.00605449
		600.32	0.00609308
		600.44	0.00613217
		600.56	0.00617178
		600.68	0.00621191
		600.8	0.00625255
		600.92	0.00629371
		601.04	0.00633538
		601.16	0.00637757
		601.28	0.00642024
		601.4	0.0064634
		601.52	0.00650707
		601.64	0.0065512
		601.76	0.0065958
		601.88	0.00664085
		602	0.00668638
		602.12	0.00673232
		602.24	0.00677868
		602.36	0.00682544
		602.48	0.00687262
		602.6	0.00692016
		602.72	0.00696806
		602.84	0.00701631
		602.96	0.00706488
		603.08	0.00711375
		603.2	0.00716291
		603.32	0.00721235
		603.44	0.00726202
		603.56	0.0073119
		603.68	0.00736199
		603.8	0.00741226
		603.92	0.00746268
		604.04	0.00751323
		604.16	0.00756388
		604.28	0.00761461
		604.4	0.0076654
		604.52	0.0077162
		604.64	0.00776701
		604.76	0.00781779
		604.88	0.00786852
		605	0.00791917
		605.12	0.00796971
		605.24	0.00802011
		605.36	0.00807035
		605.48	0.0081204
		605.6	0.00817024
		605.72	0.00821985
		605.84	0.00826917
		605.96	0.0083182
		606.08	0.0083669
		606.2	0.00841525
		606.32	0.00846323
		606.44	0.0085108
		606.56	0.00855795
		606.68	0.00860465
		606.8	0.00865088
		606.92	0.0086966
		607.04	0.00874181
		607.16	0.00878647
		607.28	0.00883057
		607.4	0.00887408
		607.52	0.00891699
		607.64	0.00895927
		607.76	0.00900091
		607.88	0.00904189
		608	0.00908222
		608.12	0.00912183
		608.24	0.00916071
		608.36	0.00919889
		608.48	0.00923633
		608.6	0.00927305
		608.72	0.00930899
		608.84	0.00934416
		608.96	0.00937856
		609.08	0.00941216
		609.2	0.00944498
		609.32	0.00947699
		609.44	0.0095082
		609.56	0.00953861
		609.68	0.0095682
		609.8	0.00959698
		609.92	0.00962494
		610.04	0.0096521
		610.16	0.00967844
		610.28	0.00970397
		610.4	0.00972869
		610.52	0.00975259
		610.64	0.00977572
		610.76	0.00979805
		610.88	0.0098196
		611	0.00984038
		611.12	0.00986039
		611.24	0.00987964
		611.36	0.00989814
		611.48	0.00991591
		611.6	0.00993295
		611.72	0.00994929
		611.84	0.00996492
		611.96	0.00997988
		612.08	0.00999417
		612.2	0.0100078
		612.32	0.0100208
		612.44	0.0100332
		612.56	0.010045
		612.68	0.0100562
		612.8	0.0100669
		612.92	0.010077
		613.04	0.0100865
		613.16	0.0100956
		613.28	0.0101042
		613.4	0.0101123
		613.52	0.01012
		613.64	0.0101272
		613.76	0.0101341
		613.88	0.0101406
		614	0.0101467
		614.12	0.0101525
		614.24	0.0101579
		614.36	0.0101631
		614.48	0.010168
		614.6	0.0101726
		614.72	0.0101771
		614.84	0.0101813
		614.96	0.0101853
		615.08	0.0101891
		615.2	0.0101929
		615.32	0.0101964
		615.44	0.0101999
		615.56	0.0102033
		615.68	0.0102067
		615.8	0.01021
		615.92	0.0102132
		616.04	0.0102165
		616.16	0.0102198
		616.28	0.0102231
		616.4	0.0102265
		616.52	0.0102299
		616.64	0.0102335
		616.76	0.0102371
		616.88	0.0102408
		617	0.0102447
		617.12	0.0102488
		617.24	0.010253
		617.36	0.0102574
		617.48	0.010262
		617.6	0.0102668
		617.72	0.0102718
		617.84	0.0102771
		617.96	0.0102826
		618.08	0.0102883
		618.2	0.0102944
		618.32	0.0103007
		618.44	0.0103073
		618.56	0.0103142
		618.68	0.0103215
		618.8	0.010329
		618.92	0.0103369
		619.04	0.0103451
		619.16	0.0103537
		619.28	0.0103626
		619.4	0.0103719
		619.52	0.0103815
		619.64	0.0103915
		619.76	0.0104019
		619.88	0.0104127
		620	0.0104238
		620.12	0.0104353
		620.24	0.0104473
		620.36	0.0104596
		620.48	0.0104723
		620.6	0.0104854
		620.72	0.0104989
		620.84	0.0105129
		620.96	0.0105272
		621.08	0.0105419
		621.2	0.0105571
		621.32	0.0105726
		621.44	0.0105886
		621.56	0.0106049
		621.68	0.0106217
		621.8	0.0106389
		621.92	0.0106565
		622.04	0.0106744
		622.16	0.0106928
		622.28	0.0107116
		622.4	0.0107308
		622.52	0.0107503
		622.64	0.0107703
		622.76	0.0107906
		622.88	0.0108113
		623	0.0108324
		623.12	0.0108538
		623.24	0.0108756
		623.36	0.0108978
		623.48	0.0109204
		623.6	0.0109432
		623.72	0.0109665
		623.84	0.01099
		623.96	0.011014
		624.08	0.0110382
		624.2	0.0110627
		624.32	0.0110876
		624.44	0.0111128
		624.56	0.0111383
		624.68	0.011164
		624.8	0.0111901
		624.92	0.0112164
		625.04	0.0112429
		625.16	0.0112698
		625.28	0.0112969
		625.4	0.0113242
		625.52	0.0113517
		625.64	0.0113794
		625.76	0.0114074
		625.88	0.0114356
		626	0.0114639
		626.12	0.0114924
		626.24	0.0115211
		626.36	0.0115499
		626.48	0.0115789
		626.6	0.011608
		626.72	0.0116372
		626.84	0.0116665
		626.96	0.0116958
		627.08	0.0117253
		627.2	0.0117548
		627.32	0.0117844
		627.44	0.011814
		627.56	0.0118436
		627.68	0.0118732
		627.8	0.0119029
		627.92	0.0119325
		628.04	0.011962
		628.16	0.0119915
		628.28	0.0120209
		628.4	0.0120503
		628.52	0.0120796
		628.64	0.0121087
		628.76	0.0121377
		628.88	0.0121666
		629	0.0121953
		629.12	0.0122238
		629.24	0.0122521
		629.36	0.0122802
		629.48	0.0123081
		629.6	0.0123358
		629.72	0.0123632
		629.84	0.0123903
		629.96	0.0124171
		630.08	0.0124437
		630.2	0.0124699
		630.32	0.0124958
		630.44	0.0125213
		630.56	0.0125465
		630.68	0.0125713
		630.8	0.0125957
		630.92	0.0126196
		631.04	0.0126432
		631.16	0.0126663
		631.28	0.012689
		631.4	0.0127112
		631.52	0.0127329
		631.64	0.0127542
		631.76	0.0127749
		631.88	0.0127951
		632	0.0128148
		632.12	0.0128339
		632.24	0.0128525
		632.36	0.0128705
		632.48	0.0128879
		632.6	0.0129048
		632.72	0.012921
		632.84	0.0129367
		632.96	0.0129517
		633.08	0.0129661
		633.2	0.0129799
		633.32	0.012993
		633.44	0.0130055
		633.56	0.0130173
		633.68	0.0130285
		633.8	0.013039
		633.92	0.0130488
		634.04	0.0130579
		634.16	0.0130664
		634.28	0.0130741
		634.4	0.0130812
		634.52	0.0130876
		634.64	0.0130932
		634.76	0.0130982
		634.88	0.0131024
		635	0.013106
		635.12	0.0131088
		635.24	0.0131109
		635.36	0.0131123
		635.48	0.013113
		635.6	0.013113
		635.72	0.0131123
		635.84	0.0131109
		635.96	0.0131087
		636.08	0.0131059
		636.2	0.0131023
		636.32	0.013098
		636.44	0.0130931
		636.56	0.0130874
		636.68	0.0130811
		636.8	0.013074
		636.92	0.0130662
		637.04	0.0130578
		637.16	0.0130487
		637.28	0.0130389
		637.4	0.0130285
		637.52	0.0130174
		637.64	0.0130056
		637.76	0.0129932
		637.88	0.0129801
		638	0.0129663
		638.12	0.0129519
		638.24	0.0129369
		638.36	0.0129213
		638.48	0.012905
		638.6	0.0128881
		638.72	0.0128706
		638.84	0.0128525
		638.96	0.0128338
		639.08	0.0128145
		639.2	0.0127946
		639.32	0.0127741
		639.44	0.012753
		639.56	0.0127314
		639.68	0.0127092
		639.8	0.0126864
		639.92	0.0126631
		640.04	0.0126392
		640.16	0.0126148
		640.28	0.0125898
		640.4	0.0125643
		640.52	0.0125383
		640.64	0.0125117
		640.76	0.0124846
		640.88	0.012457
		641	0.0124289
		641.12	0.0124002
		641.24	0.0123711
		641.36	0.0123415
		641.48	0.0123114
		641.6	0.0122807
		641.72	0.0122496
		641.84	0.012218
		641.96	0.0121859
		642.08	0.0121534
		642.2	0.0121204
		642.32	0.0120868
		642.44	0.0120529
		642.56	0.0120185
		642.68	0.0119836
		642.8	0.0119482
		642.92	0.0119124
		643.04	0.0118762
		643.16	0.0118395
		643.28	0.0118023
		643.4	0.0117647
		643.52	0.0117267
		643.64	0.0116882
		643.76	0.0116493
		643.88	0.01161
		644	0.0115702
		644.12	0.01153
		644.24	0.0114894
		644.36	0.0114484
		644.48	0.011407
		644.6	0.0113651
		644.72	0.0113228
		644.84	0.0112802
		644.96	0.0112371
		645.08	0.0111936
		645.2	0.0111498
		645.32	0.0111055
		645.44	0.0110609
		645.56	0.0110159
		645.68	0.0109705
		645.8	0.0109247
		645.92	0.0108786
		646.04	0.0108321
		646.16	0.0107852
		646.28	0.010738
		646.4	0.0106904
		646.52	0.0106425
		646.64	0.0105943
		646.76	0.0105457
		646.88	0.0104968
		647	0.0104476
		647.12	0.0103981
		647.24	0.0103483
		647.36	0.0102982
		647.48	0.0102478
		647.6	0.0101971
		647.72	0.0101461
		647.84	0.0100949
		647.96	0.0100433
		648.08	0.00999161
		648.2	0.00993962
		648.32	0.0098874
		648.44	0.00983496
		648.56	0.00978229
		648.68	0.00972943
		648.8	0.00967636
		648.92	0.0096231
		649.04	0.00956966
		649.16	0.00951606
		649.28	0.00946229
		649.4	0.00940837
		649.52	0.00935431
		649.64	0.00930012
		649.76	0.00924581
		649.88	0.00919138
		650	0.00913686
		650.12	0.00908224
		650.24	0.00902754
		650.36	0.00897277
		650.48	0.00891794
		650.6	0.00886306
		650.72	0.00880814
		650.84	0.00875319
		650.96	0.00869822
		651.08	0.00864323
		651.2	0.00858825
		651.32	0.00853327
		651.44	0.00847831
		651.56	0.00842336
		651.68	0.00836845
		651.8	0.0083136
		651.92	0.00825881
		652.04	0.00820408
		652.16	0.00814942
		652.28	0.00809485
		652.4	0.00804036
		652.52	0.00798598
		652.64	0.00793169
		652.76	0.00787753
		652.88	0.00782348
		653	0.00776956
		653.12	0.00771577
		653.24	0.00766212
		653.36	0.00760863
		653.48	0.00755528
		653.6	0.0075021
		653.72	0.00744908
		653.84	0.00739624
		653.96	0.00734356
		654.08	0.00729107
		654.2	0.00723875
		654.32	0.00718664
		654.44	0.00713472
		654.56	0.00708299
		654.68	0.00703147
		654.8	0.00698015
		654.92	0.00692904
		655.04	0.00687813
		655.16	0.00682744
		655.28	0.00677696
		655.4	0.00672667
		655.52	0.00667663
		655.64	0.00662679
		655.76	0.00657718
		655.88	0.00652777
		656	0.00647859
		656.12	0.00642964
		656.24	0.0063809
		656.36	0.00633238
		656.48	0.00628408
		656.6	0.006236
		656.72	0.00618814
		656.84	0.00614049
		656.96	0.00609305
		657.08	0.00604583
		657.2	0.00599882
		657.32	0.00595202
		657.44	0.00590542
		657.56	0.00585904
		657.68	0.00581285
		657.8	0.00576687
		657.92	0.00572109
		658.04	0.00567551
		658.16	0.00563012
		658.28	0.00558492
		658.4	0.00553992
		658.52	0.0054951
		658.64	0.00545047
		658.76	0.00540602
		658.88	0.00536176
		659	0.00531767
		659.12	0.00527376
		659.24	0.00523002
		659.36	0.00518645
		659.48	0.00514305
		659.6	0.00509982
		659.72	0.00505676
		659.84	0.00501386
		659.96	0.00497112
		660.08	0.00492854
		660.2	0.00488612
		660.32	0.00484386
		660.44	0.00480175
		660.56	0.0047598
		660.68	0.004718
		660.8	0.00467636
		660.92	0.00463487
		661.04	0.00459352
		661.16	0.00455234
		661.28	0.0045113
		661.4	0.00447041
		661.52	0.00442968
		661.64	0.0043891
		661.76	0.00434867
		661.88	0.00430839
		662	0.00426827
		662.12	0.00422831
		662.24	0.0041885
		662.36	0.00414885
		662.48	0.00410935
		662.6	0.00407002
		662.72	0.00403087
		662.84	0.00399187
		662.96	0.00395305
		663.08	0.0039144
		663.2	0.00387592
		663.32	0.00383762
		663.44	0.0037995
		663.56	0.00376155
		663.68	0.00372381
		663.8	0.00368625
		663.92	0.00364888
		664.04	0.00361172
		664.16	0.00357476
		664.28	0.00353801
		664.4	0.00350147
		664.52	0.00346514
		664.64	0.00342904
		664.76	0.00339315
		664.88	0.0033575
		665	0.00332208
		665.12	0.00328691
		665.24	0.00325197
		665.36	0.00321726
		665.48	0.00318281
		665.6	0.00314863
		665.72	0.00311468
		665.84	0.00308102
		665.96	0.00304763
		666.08	0.00301452
		666.2	0.00298168
		666.32	0.00294913
		666.44	0.00291687
		666.56	0.0028849
		666.68	0.00285322
		666.8	0.00282185
		666.92	0.00279079
		667.04	0.00276003
		667.16	0.00272959
		667.28	0.00269947
		667.4	0.00266967
		667.52	0.0026402
		667.64	0.00261105
		667.76	0.00258224
		667.88	0.00255375
		668	0.00252561
		668.12	0.00249782
		668.24	0.00247038
		668.36	0.00244328
		668.48	0.00241654
		668.6	0.00239014
		668.72	0.00236411
		668.84	0.00233843
		668.96	0.00231311
		669.08	0.00228815
		669.2	0.00226355
		669.32	0.00223934
		669.44	0.00221547
		669.56	0.00219198
		669.68	0.00216884
		669.8	0.00214608
		669.92	0.00212368
		670.04	0.00210165
		670.16	0.00207996
		670.28	0.00205867
		670.4	0.00203774
		670.52	0.00201719
		670.64	0.001997
		670.76	0.00197717
		670.88	0.00195771
		671	0.00193862
		671.12	0.00191988
		671.24	0.00190148
		671.36	0.00188347
		671.48	0.0018658
		671.6	0.0018485
		671.72	0.00183154
		671.84	0.00181493
		671.96	0.00179867
		672.08	0.00178275
		672.2	0.00176717
		672.32	0.00175193
		672.44	0.00173703
		672.56	0.00172245
		672.68	0.00170821
		672.8	0.00169429
		672.92	0.00168068
		673.04	0.0016674
		673.16	0.00165443
		673.28	0.00164176
		673.4	0.00162941
		673.52	0.00161735
		673.64	0.00160559
		673.76	0.00159412
		673.88	0.00158292
		674	0.00157203
		674.12	0.00156141
		674.24	0.00155107
		674.36	0.00154098
		674.48	0.00153118
		674.6	0.00152164
		674.72	0.00151235
		674.84	0.00150332
		674.96	0.00149453
		675.08	0.00148599
		675.2	0.00147768
		675.32	0.0014696
		675.44	0.00146176
		675.56	0.00145413
		675.68	0.00144673
		675.8	0.00143954
		675.92	0.00143256
		676.04	0.00142578
		676.16	0.00141921
		676.28	0.00141283
		676.4	0.00140664
		676.52	0.00140062
		676.64	0.0013948
		676.76	0.00138916
		676.88	0.00138369
		677	0.00137839
		677.12	0.00137325
		677.24	0.00136828
		677.36	0.00136346
		677.48	0.00135879
		677.6	0.00135428
		677.72	0.0013499
		677.84	0.00134567
		677.96	0.00134157
		678.08	0.0013376
		678.2	0.00133377
		678.32	0.00133006
		678.44	0.00132647
		678.56	0.00132299
		678.68	0.00131963
		678.8	0.00131639
		678.92	0.00131325
		679.04	0.00131021
		679.16	0.00130728
		679.28	0.00130444
		679.4	0.00130168
		679.52	0.00129903
		679.64	0.00129647
		679.76	0.001294
		679.88	0.0012916
		680	0.00128927
		680.12	0.00128705
		680.24	0.00128488
		680.36	0.0012828
		680.48	0.0012808
		680.6	0.00127886
		680.72	0.00127699
		680.84	0.00127519
		680.96	0.00127344
		681.08	0.00127176
		681.2	0.00127014
		681.32	0.00126857
		681.44	0.00126706
		681.56	0.0012656
		681.68	0.00126419
		681.8	0.00126283
		681.92	0.00126152
		682.04	0.00126025
		682.16	0.00125904
		682.28	0.00125786
		682.4	0.00125673
		682.52	0.00125564
		682.64	0.00125459
		682.76	0.00125358
		682.88	0.00125261
		683	0.00125167
		683.12	0.00125078
		683.24	0.00124992
		683.36	0.00124909
		683.48	0.0012483
		683.6	0.00124754
		683.72	0.00124681
		683.84	0.00124612
		683.96	0.00124545
		684.08	0.00124482
		684.2	0.0012442
		684.32	0.00124364
		684.44	0.0012431
		684.56	0.00124259
		684.68	0.00124211
		684.8	0.00124166
		684.92	0.00124125
		685.04	0.00124086
		685.16	0.0012405
		685.28	0.00124017
		685.4	0.00123987
		685.52	0.0012396
		685.64	0.00123936
		685.76	0.00123915
		685.88	0.00123898
		686	0.00123883
		686.12	0.00123872
		686.24	0.00123864
		686.36	0.00123859
		686.48	0.00123857
		686.6	0.00123857
		686.72	0.00123863
		686.84	0.00123872
		686.96	0.00123884
		687.08	0.00123901
		687.2	0.00123921
		687.32	0.00123945
		687.44	0.00123972
		687.56	0.00124004
		687.68	0.0012404
		687.8	0.00124081
		687.92	0.00124126
		688.04	0.00124175
		688.16	0.00124229
		688.28	0.00124287
		688.4	0.0012435
		688.52	0.00124419
		688.64	0.0012449
		688.76	0.00124569
		688.88	0.00124653
		689	0.00124743
		689.12	0.00124838
		689.24	0.00124939
		689.36	0.00125047
		689.48	0.0012516
		689.6	0.00125279
		689.72	0.00125405
		689.84	0.00125537
		689.96	0.00125676
		690.08	0.00125822
		690.2	0.00125974
		690.32	0.00126134
		690.44	0.00126302
		690.56	0.00126476
		690.68	0.00126659
		690.8	0.00126849
		690.92	0.00127047
		691.04	0.00127253
		691.16	0.00127467
		691.28	0.0012769
		691.4	0.00127921
		691.52	0.00128161
		691.64	0.0012841
		691.76	0.00128667
		691.88	0.00128934
		692	0.0012921
		692.12	0.00129496
		692.24	0.00129791
		692.36	0.00130095
		692.48	0.00130409
		692.6	0.00130733
		692.72	0.00131066
		692.84	0.0013141
		692.96	0.00131764
		693.08	0.00132129
		693.2	0.00132504
		693.32	0.00132889
		693.44	0.00133285
		693.56	0.00133691
		693.68	0.00134108
		693.8	0.00134536
		693.92	0.00134974
		694.04	0.00135423
		694.16	0.00135882
		694.28	0.00136353
		694.4	0.00136834
		694.52	0.00137326
		694.64	0.00137828
		694.76	0.00138341
		694.88	0.00138865
		695	0.00139399
		695.12	0.00139944
		695.24	0.001405
		695.36	0.00141065
		695.48	0.00141641
		695.6	0.00142227
		695.72	0.00142824
		695.84	0.0014343
		695.96	0.00144046
		696.08	0.00144671
		696.2	0.00145306
		696.32	0.00145948
		696.44	0.00146601
		696.56	0.00147264
		696.68	0.00147934
		696.8	0.00148614
		696.92	0.00149301
		697.04	0.00149996
		697.16	0.00150699
		697.28	0.00151409
		697.4	0.00152126
		697.52	0.0015285
		697.64	0.0015358
		697.76	0.00154317
		697.88	0.00155059
		698	0.00155806
		698.12	0.00156559
		698.24	0.00157316
		698.36	0.00158077
		698.48	0.00158842
		698.6	0.0015961
		698.72	0.00160381
		698.84	0.00161155
		698.96	0.0016193
		699.08	0.00162708
		699.2	0.00163486
		699.32	0.00164265
		699.44	0.00165044
		699.56	0.00165822
		699.68	0.001666
		699.8	0.00167376
		699.92	0.00168151
		700.04	0.00168922
		700.16	0.00169691
		700.28	0.00170456
		700.4	0.00171217
		700.52	0.00171974
		700.64	0.00172725
		700.76	0.0017347
		700.88	0.00174208
		701	0.0017494
		701.12	0.00175664
		701.24	0.0017638
		701.36	0.00177087
		701.48	0.00177785
		701.6	0.00178473
		701.72	0.0017915
		701.84	0.00179816
		701.96	0.0018047
		702.08	0.00181112
		702.2	0.00181741
		702.32	0.00182357
		702.44	0.00182958
		702.56	0.00183545
		702.68	0.00184117
		702.8	0.00184672
		702.92	0.00185212
		703.04	0.00185734
		703.16	0.00186239
		703.28	0.00186726
		703.4	0.00187194
		703.52	0.00187644
		703.64	0.00188073
		703.76	0.00188483
		703.88	0.00188872
		704	0.00189239
		704.12	0.00189585
		704.24	0.0018991
		704.36	0.00190211
		704.48	0.0019049
		704.6	0.00190745
		704.72	0.00190976
		704.84	0.00191183
		704.96	0.00191366
		705.08	0.00191523
		705.2	0.00191655
		705.32	0.00191762
		705.44	0.00191842
		705.56	0.00191896
		705.68	0.00191924
		705.8	0.00191924
		705.92	0.00191898
		706.04	0.00191844
		706.16	0.00191762
		706.28	0.00191653
		706.4	0.00191515
		706.52	0.0019135
		706.64	0.00191156
		706.76	0.00190933
		706.88	0.00190682
		707	0.00190403
		707.12	0.00190094
		707.24	0.00189757
		707.36	0.00189391
		707.48	0.00188996
		707.6	0.00188572
		707.72	0.0018812
		707.84	0.00187638
		707.96	0.00187128
		708.08	0.0018659
		708.2	0.00186023
		708.32	0.00185427
		708.44	0.00184803
		708.56	0.00184151
		708.68	0.00183471
		708.8	0.00182764
		708.92	0.00182029
		709.04	0.00181267
		709.16	0.00180477
		709.28	0.00179661
		709.4	0.00178819
		709.52	0.0017795
		709.64	0.00177055
		709.76	0.00176135
		709.88	0.0017519
		710	0.0017422
		710.12	0.00173225
		710.24	0.00172207
		710.36	0.00171165
		710.48	0.001701
		710.6	0.00169012
		710.72	0.00167902
		710.84	0.0016677
		710.96	0.00165616
		711.08	0.00164442
		711.2	0.00163247
		711.32	0.00162033
		711.44	0.00160799
		711.56	0.00159547
		711.68	0.00158276
		711.8	0.00156988
		711.92	0.00155682
		712.04	0.0015436
		712.16	0.00153022
		712.28	0.00151668
		712.4	0.001503
		712.52	0.00148917
		712.64	0.00147521
		712.76	0.00146111
		712.88	0.0014469
		713	0.00143256
		713.12	0.00141811
		713.24	0.00140355
		713.36	0.0013889
		713.48	0.00137415
		713.6	0.00135931
		713.72	0.00134439
		713.84	0.00132939
		713.96	0.00131432
		714.08	0.00129919
		714.2	0.00128401
		714.32	0.00126877
		714.44	0.00125348
		714.56	0.00123816
		714.68	0.0012228
		714.8	0.00120741
		714.92	0.00119201
		715.04	0.00117656
		715.16	0.00116113
		715.28	0.00114569
		715.4	0.00113025
		715.52	0.00111482
		715.64	0.0010994
		715.76	0.001084
		715.88	0.00106862
		716	0.00105327
		716.12	0.00103795
		716.24	0.00102267
		716.36	0.00100744
		716.48	0.000992248
		716.6	0.000977112
		716.72	0.000962033
		716.84	0.000947016
		716.96	0.000932065
		717.08	0.000917185
		717.2	0.00090238
		717.32	0.000887654
		717.44	0.000873012
		717.56	0.000858457
		717.68	0.000843993
		717.8	0.000829623
		717.92	0.000815353
		718.04	0.000801184
		718.16	0.00078712
		718.28	0.000773164
		718.4	0.000759321
		718.52	0.000745592
		718.64	0.00073198
		718.76	0.000718489
		718.88	0.000705121
		719	0.000691878
		719.12	0.000678763
		719.24	0.000665778
		719.36	0.000652926
		719.48	0.000640208
		719.6	0.000627627
		719.72	0.000615184
		719.84	0.000602881
		719.96	0.00059072
		720.08	0.000578702
		720.2	0.000566828
		720.32	0.0005551
		720.44	0.000543519
		720.56	0.000532087
		720.68	0.000520803
		720.8	0.000509669
		720.92	0.000498686
		721.04	0.000487855
		721.16	0.000477175
		721.28	0.000466647
		721.4	0.000456272
		721.52	0.000446051
		721.64	0.000435982
		721.76	0.000426067
		721.88	0.000416305
		722	0.000406696
		722.12	0.00039724
		722.24	0.000387937
		722.36	0.000378787
		722.48	0.000369788
		722.6	0.000360942
		722.72	0.000352246
		722.84	0.000343701
		722.96	0.000335306
		723.08	0.00032706
		723.2	0.000318962
		723.32	0.000311012
		723.44	0.000303208
		723.56	0.000295549
		723.68	0.000288035
		723.8	0.000280665
		723.92	0.000273436
		724.04	0.000266349
		724.16	0.000259402
		724.28	0.000252593
		724.4	0.000245922
		724.52	0.000239386
		724.64	0.000232985
		724.76	0.000226717
		724.88	0.000220581
		725	0.000214575
		725.12	0.000208697
		725.24	0.000202947
		725.36	0.000197323
		725.48	0.000191822
		725.6	0.000186444
		725.72	0.000181186
		725.84	0.000176048
		725.96	0.000171027
		726.08	0.000166121
		726.2	0.00016133
		726.32	0.000156652
		726.44	0.000152083
		726.56	0.000147624
		726.68	0.000143273
		726.8	0.000139026
		726.92	0.000134884
		727.04	0.000130843
		727.16	0.000126903
		727.28	0.000123062
		727.4	0.000119317
		727.52	0.000115668
		727.64	0.000112112
		727.76	0.000108648
		727.88	0.000105274
		728	0.000101988
		728.12	9.87889e-05
		728.24	9.56746e-05
		728.36	9.26437e-05
		728.48	8.96944e-05
		728.6	8.68251e-05
		728.72	8.40341e-05
		728.84	8.13198e-05
		728.96	7.86806e-05
		729.08	7.6115e-05
		729.2	7.36213e-05
		729.32	7.11979e-05
		729.44	6.88434e-05
		729.56	6.65562e-05
		729.68	6.43349e-05
		729.8	6.21778e-05
		729.92	6.00835e-05
		730.04	5.80506e-05
		730.16	5.60777e-05
		730.28	5.41633e-05
		730.4	5.2306e-05
		730.52	5.05044e-05
		730.64	4.87573e-05
		730.76	4.70632e-05
		730.88	4.54209e-05
		731	4.3829e-05
		731.12	4.22675e-05
		731.24	4.07739e-05
		731.36	3.93269e-05
		731.48	3.79253e-05
		731.6	3.6568e-05
		731.72	3.52538e-05
		731.84	3.39815e-05
		731.96	3.275e-05
		732.08	3.15583e-05
		732.2	3.04052e-05
		732.32	2.92897e-05
		732.44	2.82108e-05
		732.56	2.71674e-05
		732.68	2.61586e-05
		732.8	2.51833e-05
		732.92	2.42407e-05
		733.04	2.33297e-05
		733.16	2.24495e-05
		733.28	2.15992e-05
		733.4	2.07779e-05
		733.52	1.99848e-05
		733.64	1.92189e-05
		733.76	1.84796e-05
		733.88	1.7766e-05
		734	1.70774e-05
		734.12	1.64129e-05
		734.24	1.57719e-05
		734.36	1.51535e-05
		734.48	1.45572e-05
		734.6	1.39822e-05
		734.72	1.34279e-05
		734.84	1.28936e-05
		734.96	1.23787e-05
		735.08	1.18825e-05
		735.2	1.14044e-05
		735.32	1.09439e-05
		735.44	1.05004e-05
		735.56	1.00734e-05
		735.68	9.66223e-06
		735.8	9.26645e-06
		735.92	8.88552e-06
		736.04	8.51895e-06
		736.16	8.16626e-06
		736.28	7.82699e-06
		736.4	7.50066e-06
		736.52	7.18685e-06
		736.64	6.88512e-06
		736.76	6.59506e-06
		736.88	6.31625e-06
		737	6.04831e-06
		737.12	5.79086e-06
		737.24	5.54352e-06
		737.36	5.30594e-06
		737.48	5.07777e-06
		737.6	4.85867e-06
		737.72	4.64832e-06
		737.84	4.4464e-06
		737.96	4.2526e-06
		738.08	4.06664e-06
		738.2	3.88821e-06
		738.32	3.71704e-06
		738.44	3.55287e-06
		738.56	3.39544e-06
		738.68	3.24448e-06
		738.8	3.09977e-06
		738.92	2.96106e-06
		739.04	2.82812e-06
		739.16	2.70074e-06
		739.28	2.57871e-06
		739.4	2.46181e-06
		739.52	2.34986e-06
		739.64	2.24265e-06
		739.76	2.14001e-06
		739.88	2.04176e-06
[truncated: 1 more rows]

## Sheet: PlotDat6
Source sheet	UAE Reporting table	398.081	456.085		187.34	0	187.34	1300	187.34	192.862
Plot name	ProbPlot6	451.308	535.884		281.377	0	281.377	1300	1299.72	1294.2
Plot Type	17	482.437	553.585		395.618	0	395.618	1300
1st free col	12	505.171	554.686		497.538	0	497.538	1300
Sigma Level	2	523.44	555.117		551.871	0	551.871	1300
Absolute Errs	TRUE	538.913	567.002		617.664	0	617.664	1300
Symbol Type	1	552.46	607.034		665.105	0	665.105	1300
Inverse Plot	FALSE	564.599	608.171		743.531	0	743.531	1300
Color Plot	TRUE	575.661	613.15		821.957	0	821.957	1300
3D plot	FALSE	585.874	613.842		869.398	0	869.398	1300
Linear	FALSE	595.399	617.465		935.191	0	935.191	1300
Data Range	AC104:AD169	604.359	625.125		989.524	0	989.524	1300
Filled Symbols	TRUE	612.845	627.036		1091.44	0	1091.44	1300
ConcAge	FALSE	620.93	629.836		1205.69	0	1205.69	1300
ConcSwap	FALSE	628.672	630.079		1299.72	0	1299.72	1300
1st Symbol-row	1	636.117	632.193			MinY		MaxY
		643.305	633.457
		650.269	636.32
		657.036	636.356
		663.63	636.37
		670.073	638.63
		676.382	640.028
		682.574	641.828
		688.662	642.978
		694.662	649.579
		700.583	649.848
		706.438	651.308
		712.237	654.408
		717.989	673.192
		723.703	680.497
		729.389	683.411
		735.054	690.35
		740.707	704.278
		746.356	719.339
		752.009	731.256
		757.674	734.494
		763.36	745.911
		769.074	748.425
		774.826	748.771
		780.625	761.608
		786.479	771.922
		792.401	777.896
		798.4	778.608
		804.489	785.077
		810.681	807.304
		816.99	809.279
		823.432	813.555
		830.027	817.364
		836.794	823.101
		843.757	842.463
		850.945	844.657
		858.391	844.962
		866.132	852.576
		874.217	858.786
		882.703	859.435
		891.663	872.064
		901.189	895.503
		911.402	973.573
		922.464	974.361
		934.602	984.073
		948.15	991.63
		963.622	1021.9
		981.892	1033.73
		1004.63	1050.3
		1035.75	1102.11
		1088.98	1127.91
		IsoLine	IsoLine

## Sheet: PlotDat7
Source sheet	UAE Reporting table	407.614	518.67		239.903	450	239.903	1150	439.918	450
Plot name	ProbPlot7	450.441	532.786		316.505	450	316.505	1150	1146.05	1127.99
Plot Type	17	475.423	534.387		409.566	450	409.566	1150
1st free col	12	493.631	547.681		492.589	450	492.589	1150
Sigma Level	2	508.236	549.567		536.849	450	536.849	1150
Absolute Errs	TRUE	520.584	557.379		590.444	450	590.444	1150
Symbol Type	1	531.378	582.571		629.089	450	629.089	1150
Inverse Plot	FALSE	541.034	593.559		692.975	450	692.975	1150
Color Plot	TRUE	549.82	598.034		756.86	450	756.86	1150
3D plot	FALSE	557.918	599.999		795.506	450	795.506	1150
Linear	FALSE	565.46	600.52		849.1	450	849.1	1150
Data Range	AC11:AD82	572.542	601.593		893.36	450	893.36	1150
Filled Symbols	TRUE	579.239	601.948		976.383	450	976.383	1150
ConcAge	FALSE	585.609	602.387		1069.44	450	1069.44	1150
ConcSwap	FALSE	591.698	606.234		1146.05	450	1146.05	1150
1st Symbol-row	1	597.544	607.39			MinY		MaxY
		603.178	608.879
		608.626	609
		613.91	609.878
		619.05	610.252
		624.061	611.655
		628.958	612.003
		633.754	613.059
		638.46	613.42
		643.086	613.801
		647.641	618.264
		652.133	620.433
		656.571	622.659
		660.961	625.572
		665.309	626.383
		669.623	627.054
		673.908	627.669
		678.169	627.673
		682.412	631.928
		686.642	632.868
		690.865	636.839
		695.085	639.696
		699.307	641.494
		703.537	642.767
		707.781	644.481
		712.042	645.054
		716.326	670.642
		720.64	681.011
		724.988	683.267
		729.378	694.784
		733.816	719.645
		738.308	732.11
		742.863	733.465
		747.489	738.439
		752.195	751.473
		756.991	759.268
		761.888	761.708
		766.899	768.079
		772.039	774.783
		777.323	785.529
		782.771	787.177
		788.405	790.89
		794.251	791.643
		800.34	797.501
		806.71	798.177
		813.407	809.584
		820.489	815.372
		828.031	819.726
		836.129	828.263
		844.915	846.872
		854.571	862.529
		865.365	875.004
		877.713	925.085
		892.318	949.029
		910.526	1007.81
		935.508	1043.53
		978.335	1044.29
		IsoLine	IsoLine

## Sheet: UAE Reporting table
		(cps)	mV	mV	mV	mV		(ppm)	(ppm)	Ratios				Ratios					Ages						Disc %	Disc %	Used in PDP's	Disc?	Disc?
MC / SC	Sample_Spot	204Pb	206Pb	207Pb	232Th	238U	Th/U	Pb	U	238U/206Pb	1s %	207Pb/206Pb	1s %	207Pb/235U	1s %	206Pb/238U	1s %	Rho	207Pb/206Pb	2s abs	206Pb/238U	2s abs	207Pb/235U	2s abs	6-38/7-6	6-38/7-35	conc <>1Ga	>10%	>5%
MC	UAE_6145_01	bd	2.53681	0.137225	#N/A	26.6854	#N/A	16.8823	173.341	9.63076	1.58799	0.0603614	0.752858	0.864171	1.75741	0.103834	1.58799	0.903594	616.553	32.5098	636.839	19.2302	632.397	16.411	103.29	100.702	100.702
MC	UAE_6145_02	bd	1.81249	0.0966608	#N/A	18.7533	#N/A	12.062	121.816	9.50194	1.22618	0.0608595	0.982471	0.883115	1.57123	0.105242	1.22618	0.780394	634.272	42.2999	645.054	15.0358	642.664	14.8546	101.7	100.372	100.372
MC	UAE_6145_03	bd	7.29319	1.00093	#N/A	20.1608	#N/A	48.5357	130.959	2.51403	2.39543	0.15638	0.323472	8.57655	2.41717	0.397767	2.39543	0.991005	2416.9	10.9817	2158.75	87.2936	2294.07	43.0363	89.3191	94.1012	89.3191	x	x
MC	UAE_6145_04	bd	0.941593	0.0500669	#N/A	10.8393	#N/A	6.26624	70.4089	10.3683	1.58184	0.0599165	1.71329	0.796785	2.33186	0.096448	1.58184	0.678361	600.561	74.1812	593.559	17.9149	595.014	20.7853	98.8341	99.7556	99.7556
MC	UAE_6145_05	344.708	1.0857	0.0634375	#N/A	9.27923	#N/A	7.22527	60.2752	7.66105	1.29011	0.0659358	1.40632	1.18668	1.90843	0.13053	1.29011	0.676005	804.339	58.892	790.89	19.176	794.421	20.8174	98.328	99.5556	99.5556
MC	UAE_6145_06	bd	1.48445	0.078803	#N/A	15.5747	#N/A	9.87892	101.169	9.55735	1.73477	0.0608378	1.18461	0.877682	2.10065	0.104631	1.73477	0.825825	633.504	51.0096	641.494	21.1506	639.73	19.7469	101.261	100.276	100.276
MC	UAE_6145_07	bd	1.90491	0.113958	#N/A	15.2881	#N/A	12.6771	99.3071	7.12298	2.22081	0.0673687	0.848425	1.30406	2.37735	0.140391	2.22081	0.934151	849.192	35.2767	846.872	35.1527	847.513	26.9636	99.7267	99.9243	99.9243
MC	UAE_6145_08	bd	0.345706	0.0185524	#N/A	3.92433	#N/A	2.30065	25.4913	10.1212	2.4315	0.0604161	4.12884	0.823046	4.79161	0.098803	2.4315	0.50745	618.509	178.233	607.39	28.1271	609.746	43.0069	98.2023	99.6136	99.6136
MC	UAE_6145_09	415.57	0.233276	0.0120342	#N/A	2.60987	#N/A	1.55244	16.953	10.217	1.56761	0.0589337	6.10074	0.795317	6.29893	0.0978758	1.56761	0.248869	564.646	265.749	601.948	17.9929	594.183	55.1416	106.606	101.307	101.307
MC	UAE_6145_10	373.438	0.317378	0.01817	#N/A	2.83141	#N/A	2.11213	18.392	8.00011	1.54734	0.0644945	4.2453	1.11155	4.5185	0.124998	1.54734	0.342445	757.888	179.112	759.268	22.1279	758.918	47.19	100.182	100.046	100.046
MC	UAE_6145_11	bd	0.905203	0.0511617	#N/A	8.18191	#N/A	6.02407	53.1473	8.23932	1.64076	0.0635189	1.71803	1.06295	2.37565	0.121369	1.64076	0.690658	725.65	72.8647	738.439	22.8551	735.276	24.5586	101.763	100.43	100.43
MC	UAE_6145_12	bd	1.524	0.0811861	#N/A	16.1238	#N/A	10.1421	104.736	9.51083	1.15602	0.0599622	1.16381	0.869282	1.64038	0.105143	1.15602	0.704728	602.21	50.3763	644.481	14.1645	635.177	15.3744	107.019	101.465	101.465
MC	UAE_6145_13	bd	12.528	2.34703	#N/A	24.0448	#N/A	83.3731	156.188	1.68435	1.312	0.211516	0.471431	17.3146	1.39413	0.593701	1.312	0.941091	2917.2	15.2648	3004.41	62.7089	2952.43	26.4189	102.99	101.761	102.99
MC	UAE_6145_14	bd	3.70154	0.20674	#N/A	38.9611	#N/A	24.6335	253.08	9.70935	1.37729	0.0628776	0.52392	0.892909	1.47357	0.102994	1.37729	0.93466	704.093	22.2987	631.928	16.5597	647.931	14.0187	89.7508	97.5302	97.5302
MC	UAE_6145_15	bd	3.65018	0.212468	#N/A	31.5163	#N/A	24.2917	204.721	7.97295	1.93844	0.0655296	0.516209	1.13323	2.006	0.125424	1.93844	0.966323	791.385	21.662	761.708	27.7926	769.294	21.4133	96.25	99.0139	99.0139
MC	UAE_6145_16	bd	0.532862	0.0324058	#N/A	4.49517	#N/A	3.54616	29.1993	7.69946	1.51263	0.0674092	2.60795	1.20715	3.01487	0.129879	1.51263	0.501723	850.441	108.415	787.177	22.3787	803.879	32.9453	92.561	97.9222	97.9222
MC	UAE_6145_17	bd	7.79437	0.460802	#N/A	76.499	#N/A	51.871	496.915	8.94352	1.23231	0.0665395	0.257135	1.02582	1.25885	0.111813	1.23231	0.978916	823.394	10.7353	683.267	15.9585	716.836	12.8633	82.9818	95.3171	95.3171
MC	UAE_6145_18	bd	1.16449	0.0644331	#N/A	13.3095	#N/A	7.74961	86.4546	10.2425	1.49118	0.0624828	1.38879	0.841117	2.03773	0.0976326	1.49118	0.731783	690.675	59.239	600.52	17.0781	619.762	18.7314	86.9469	96.8953	96.8953
MC	UAE_6145_19	bd	2.14343	0.115504	#N/A	24.0629	#N/A	14.2644	156.306	10.0952	1.5562	0.0611323	0.85704	0.834942	1.77659	0.0990569	1.5562	0.875947	643.891	36.8405	608.879	18.058	616.351	16.2852	94.5625	98.7878	98.7878
MC	UAE_6145_20	bd	4.84348	0.712789	#N/A	11.6196	#N/A	32.2331	75.4775	2.18025	1.77545	0.16593	0.194471	10.4935	1.78607	0.458664	1.77545	0.994055	2517	6.53599	2433.65	71.5784	2479.34	32.5866	96.6886	98.1572	96.6886
MC	UAE_6145_21	bd	2.03996	0.118286	#N/A	17.6978	#N/A	13.5758	114.96	7.8303	1.58866	0.0653435	0.816739	1.1506	1.78631	0.127709	1.58866	0.889353	785.417	34.3062	774.783	23.1539	777.528	19.2249	98.646	99.6469	99.6469
MC	UAE_6145_22	bd	2.93802	0.157498	#N/A	31.6312	#N/A	19.5523	205.467	9.58558	1.14342	0.0599652	0.655111	0.862545	1.31779	0.104323	1.14342	0.867678	602.318	28.3564	639.696	13.9114	631.511	12.3182	106.206	101.296	101.296
MC	UAE_6145_23	bd	0.532633	0.0276466	#N/A	6.00124	#N/A	3.54464	38.9823	10.2092	1.64793	0.0585026	2.89011	0.790102	3.32692	0.0979505	1.64793	0.495331	548.635	126.235	602.387	18.9266	591.23	29.3906	109.797	101.887	101.887
MC	UAE_6145_24	bd	1.61484	0.0836798	#N/A	21.468	#N/A	10.7467	139.45	11.9355	1.31693	0.0583404	1.11343	0.673956	1.72453	0.083784	1.31693	0.763643	542.569	48.6827	518.67	13.1125	523.115	14.003	95.5952	99.1502	99.1502
MC	UAE_6145_25	bd	1.55194	0.0817478	#N/A	17.6216	#N/A	10.3281	114.465	10.2518	1.8218	0.0602892	1.18677	0.81085	2.17425	0.0975438	1.8218	0.837898	613.969	51.2689	599.999	20.8413	602.931	19.5809	97.7246	99.5137	99.5137
MC	UAE_6145_26	bd	0.548722	0.0298518	#N/A	6.08441	#N/A	3.65171	39.5226	9.86108	2.02604	0.0614529	2.75267	0.859249	3.4179	0.101409	2.02604	0.592772	655.123	118.106	622.659	24.0056	629.713	31.5812	95.0446	98.8799	98.8799
MC	UAE_6145_27	bd	1.40526	0.0901276	#N/A	9.93965	#N/A	9.35192	64.5651	6.48041	1.89181	0.0721488	1.04338	1.53507	2.16046	0.154311	1.89181	0.875652	990.141	42.4425	925.085	32.524	944.53	26.2255	93.4296	97.9413	97.9413
MC	UAE_6145_28	bd	2.25637	0.132686	#N/A	20.7759	#N/A	15.016	134.954	8.08808	1.68664	0.0661024	0.852669	1.12687	1.88992	0.123639	1.68664	0.89244	809.62	35.6768	751.473	23.8833	766.259	20.1337	92.818	98.0704	98.0704
MC	UAE_6145_29	bd	1.95498	0.114776	#N/A	16.985	#N/A	13.0103	110.33	7.71661	1.40019	0.0663426	0.848973	1.18541	1.63747	0.129591	1.40019	0.855097	817.202	35.4793	785.529	20.6772	793.828	17.8788	96.1242	98.9546	98.9546
MC	UAE_6145_30	bd	3.40712	0.201231	#N/A	28.8891	#N/A	22.6742	187.655	7.58674	1.38815	0.0665897	0.513244	1.21019	1.47999	0.131809	1.38815	0.937943	824.967	21.4224	798.177	20.8092	805.278	16.3248	96.7526	99.1182	99.1182
MC	UAE_6145_31	310.831	8.81399	0.497097	#N/A	88.9267	#N/A	58.6566	577.642	8.97474	1.38882	0.0634535	0.385453	0.974843	1.44132	0.111424	1.38882	0.963577	723.465	16.3536	681.011	17.9262	690.957	14.3466	94.1319	98.5606	98.5606
MC	UAE_6145_32	bd	0.526192	0.0302201	#N/A	5.36928	#N/A	3.50177	34.8773	8.78728	1.85904	0.0629517	2.77066	0.987767	3.33655	0.113801	1.85904	0.557173	706.601	117.875	694.784	24.4428	697.58	33.1241	98.3277	99.5991	99.5991
MC	UAE_6145_33	bd	2.88925	0.154572	#N/A	33.1556	#N/A	19.2278	215.369	10.2233	1.39198	0.0602201	0.633078	0.812175	1.52918	0.0978153	1.39198	0.910278	611.492	27.3607	601.593	15.9706	603.673	13.8232	98.3812	99.6554	99.6554
MC	UAE_6145_34	bd	11.9178	1.71073	#N/A	30.2621	#N/A	79.3122	196.574	2.30145	1.12219	0.16262	0.15986	9.74259	1.13351	0.434509	1.12219	0.990005	2483.09	5.39094	2326.01	43.6753	2410.74	20.6645	93.6743	96.4855	93.6743	x	x
MC	UAE_6145_35	310.113	0.658931	0.0389244	#N/A	5.58183	#N/A	4.38514	36.2579	7.65331	1.44991	0.0667978	2.19474	1.20341	2.63043	0.130662	1.44991	0.551208	831.477	91.5119	791.643	21.5666	802.16	28.7633	95.2093	98.689	98.689
MC	UAE_6145_36	bd	1.21712	0.056284	#N/A	26.5813	#N/A	8.09986	172.664	19.5846	1.28973	0.0521495	1.57589	0.367145	2.03638	0.0510606	1.28973	0.633345	291.973	71.9842	321.03	8.07297	317.535	11.0453	109.952	101.1	101.1
MC	UAE_6145_37	bd	0.922882	0.0461603	#N/A	12.0408	#N/A	6.14172	78.2135	11.6063	1.50814	0.0561567	1.84361	0.667125	2.38189	0.0861598	1.50814	0.633169	458.567	81.778	532.786	15.4057	518.963	19.174	116.185	102.664	102.664
MC	UAE_6145_38	bd	1.48308	0.0974006	#N/A	9.34725	#N/A	9.8698	60.717	5.68653	1.58723	0.0735995	1.00496	1.78455	1.87863	0.175854	1.58723	0.844889	1030.51	40.6294	1044.29	30.5323	1039.84	24.16	101.337	100.428	101.337
MC	UAE_6145_39	bd	7.82613	0.820337	#N/A	28.0711	#N/A	52.0824	182.342	3.20223	1.37007	0.118057	0.215007	5.08323	1.38684	0.312282	1.37007	0.987909	1927.02	7.70432	1751.93	41.8986	1833.31	23.2652	90.9138	95.5608	90.9138		x
MC	UAE_6145_40	bd	5.92791	0.387203	#N/A	39.3523	#N/A	39.4499	255.621	5.90949	1.14168	0.0735054	0.302518	1.71503	1.18108	0.169219	1.14168	0.966641	1027.92	12.2353	1007.81	21.2682	1014.17	15.0389	98.0436	99.3732	98.0436
MC	UAE_6145_41	bd	3.77723	0.223522	#N/A	31.0623	#N/A	25.1372	201.772	7.29375	1.2191	0.0666242	0.478717	1.25945	1.30972	0.137104	1.2191	0.930807	826.047	19.9778	828.263	18.9234	827.662	14.7186	100.268	100.073	100.073
MC	UAE_6145_42	bd	1.14998	0.0614518	#N/A	12.5843	#N/A	7.65304	81.744	9.78858	1.1015	0.0602042	1.46514	0.848025	1.83302	0.10216	1.1015	0.600922	610.923	63.3273	627.054	13.15	623.564	16.9394	102.64	100.56	100.56
MC	UAE_6145_43	bd	0.835923	0.0434083	#N/A	9.34989	#N/A	5.56302	60.7342	10.0104	1.21993	0.0585822	2.02248	0.806893	2.36191	0.0998963	1.21993	0.516499	551.602	88.2941	613.801	14.2692	600.71	21.1966	111.276	102.179	102.179
MC	UAE_6145_44	bd	4.28856	0.233511	#N/A	49.6468	#N/A	28.5401	322.491	10.1414	1.25695	0.0606391	0.468845	0.824437	1.34155	0.098606	1.25695	0.936944	626.457	20.2122	606.234	14.5291	610.521	12.237	96.772	99.2979	99.2979
MC	UAE_6145_45	bd	2.57859	0.137283	#N/A	28.7662	#N/A	17.1604	186.857	10.0779	1.23511	0.0603498	0.728922	0.825672	1.43417	0.0992272	1.23511	0.861207	616.139	31.4784	609.878	14.3587	611.208	13.0871	98.9839	99.7824	99.7824
MC	UAE_6145_46	bd	1.33154	0.0707568	#N/A	14.8872	#N/A	8.86132	96.7029	10.0169	1.32927	0.0597162	1.28948	0.821978	1.85195	0.0998312	1.32927	0.717766	593.308	55.8995	613.42	15.5374	609.151	16.8269	103.39	100.701	100.701
MC	UAE_6145_47	bd	0.846064	0.0444639	#N/A	9.50388	#N/A	5.6305	61.7344	9.81292	1.4558	0.0592424	1.96596	0.832407	2.44629	0.101906	1.4558	0.595106	576.016	85.4731	625.572	17.335	614.947	22.3203	108.603	101.728	101.728
MC	UAE_6145_48	bd	7.29518	0.383341	#N/A	88.8862	#N/A	48.549	577.379	10.573	1.34904	0.0587542	0.326895	0.766201	1.38808	0.0945807	1.34904	0.971874	558.001	14.2556	582.571	15.0114	577.581	12.1555	104.403	100.864	100.864
MC	UAE_6145_49	bd	0.677851	0.0358276	#N/A	7.79607	#N/A	4.51106	50.641	9.93463	1.39326	0.0598448	2.32097	0.83057	2.70705	0.100658	1.39326	0.51468	597.969	100.536	618.264	16.4068	613.928	24.6414	103.394	100.706	100.706
MC	UAE_6145_50	bd	24.9525	3.84641	#N/A	59.6154	#N/A	166.057	387.244	2.111	1.68434	0.173625	0.120816	11.3403	1.68867	0.473708	1.68434	0.997437	2592.9	4.03045	2499.8	69.4285	2551.53	31.0349	96.4096	97.9728	96.4096
MC	UAE_6145_51	bd	4.75113	0.315484	#N/A	30.7547	#N/A	31.6185	199.774	5.69097	1.29728	0.0746433	0.394742	1.80845	1.356	0.175717	1.29728	0.956691	1058.91	15.8908	1043.53	24.9489	1048.52	17.579	98.5477	99.5248	98.5477
MC	UAE_6145_52	bd	3.14778	0.163594	#N/A	40.7675	#N/A	20.9483	264.814	11.2371	1.35059	0.0582232	0.626771	0.714403	1.48894	0.088991	1.35059	0.907083	538.17	27.425	549.567	14.214	547.357	12.5224	102.118	100.404	100.404
MC	UAE_6145_53	bd	1.61554	0.0870427	#N/A	17.8965	#N/A	10.7513	116.25	9.69422	1.51904	0.0601639	1.09061	0.855705	1.87001	0.103154	1.51904	0.81232	609.473	47.1505	632.868	18.2875	627.776	17.362	103.839	100.811	100.811
MC	UAE_6145_54	bd	4.07328	0.209999	#N/A	52.7724	#N/A	27.1074	342.794	11.2775	1.8566	0.0580851	0.548917	0.710157	1.93605	0.0886724	1.8566	0.958965	532.973	24.0397	547.681	19.4671	544.84	16.1967	102.76	100.521	100.521
MC	UAE_6145_55	bd	5.02788	0.266849	#N/A	57.5775	#N/A	33.4602	374.007	10.0412	1.47452	0.0597708	0.402218	0.820737	1.52839	0.0995895	1.47452	0.964751	595.287	17.4305	612.003	17.195	608.459	13.8956	102.808	100.582	100.582
MC	UAE_6145_56	bd	6.61886	0.397428	#N/A	62.9436	#N/A	44.0481	408.863	8.31472	1.17253	0.0675482	0.315598	1.12013	1.21426	0.120269	1.17253	0.965633	854.723	13.1108	732.11	16.209	763.037	12.9451	85.6546	95.9469	95.9469
MC	UAE_6145_57	bd	6.02209	0.370111	#N/A	53.4589	#N/A	40.0766	347.253	7.90284	1.36146	0.0687019	0.344502	1.19863	1.40437	0.126537	1.36146	0.969445	889.801	14.2328	768.079	19.6861	799.956	15.4301	86.3202	96.0151	96.0151
MC	UAE_6145_58	bd	1.63766	0.0888537	#N/A	18.6124	#N/A	10.8985	120.901	9.8982	1.69544	0.0604188	1.07799	0.841621	2.00912	0.101028	1.69544	0.84387	618.605	46.5337	620.433	20.0263	620.04	18.4767	100.295	100.063	100.063
MC	UAE_6145_59	bd	5.42641	0.290982	#N/A	60.091	#N/A	36.1124	390.334	9.77852	1.60318	0.0604	0.390545	0.851658	1.65006	0.102265	1.60318	0.971586	617.936	16.8606	627.669	19.1481	625.559	15.2964	101.575	100.337	100.337
MC	UAE_6145_60	bd	0.49264	0.0341677	#N/A	4.25136	#N/A	3.27849	27.6156	7.59358	1.80574	0.0771966	2.54166	1.40169	3.11781	0.13169	1.80574	0.57917	1126.27	101.297	797.501	27.0346	889.652	36.2961	70.8088	89.6418	89.6418	x	x
MC	UAE_6145_61	363.216	6.10537	0.447809	#N/A	89.7874	#N/A	40.6309	583.233	13.1413	3.05166	0.0810149	0.744454	0.850016	3.14115	0.0760958	3.05166	0.97151	1221.81	29.2594	472.777	27.7625	624.658	28.8939	38.6949	75.6858	75.6858	x	x
MC	UAE_6145_62	bd	7.24302	0.378635	#N/A	81.9047	#N/A	48.2018	532.029	10.0472	1.20368	0.0598812	0.346076	0.821763	1.25244	0.0995301	1.20368	0.961066	599.286	14.9875	611.655	14.0325	609.032	11.4086	102.064	100.431	100.431
MC	UAE_6145_63	bd	1.06842	0.0588423	#N/A	11.8407	#N/A	7.11027	76.9137	9.79958	1.45472	0.0621426	1.51871	0.874346	2.10302	0.102045	1.45472	0.691728	679.021	64.9049	626.383	17.3434	637.925	19.7292	92.248	98.1908	98.1908
MC	UAE_6145_64	bd	7.7481	0.390004	#N/A	119.085	#N/A	51.5631	773.542	13.5734	1.6177	0.0567081	0.290332	0.576047	1.64355	0.0736735	1.6177	0.984274	480.202	12.8304	458.25	14.2956	461.918	12.1265	95.4286	99.2058	99.2058
MC	UAE_6145_65	bd	4.69004	0.221733	#N/A	109.569	#N/A	31.2119	711.728	20.6017	1.77608	0.0532329	0.497489	0.35627	1.84444	0.0485398	1.77608	0.962938	338.736	22.5357	305.55	10.5917	309.426	9.79176	90.203	98.7475	98.7475
MC	UAE_6145_66	bd	0.188538	0.0095254	#N/A	22.1372	#N/A	1.25471	143.797	101.554	1.18468	0.0553826	7.90695	0.0751928	7.99521	0.00984695	1.18468	0.148173	427.703	352.617	63.167	1.48917	73.6153	11.2918	14.7689	85.8069	85.8069	x	x
MC	UAE_6145_67	bd	6.93991	0.431472	#N/A	55.6562	#N/A	46.1847	361.527	6.985	1.53761	0.0700634	0.273819	1.38301	1.5618	0.143164	1.53761	0.984511	930.21	11.2416	862.529	24.7791	881.723	18.2423	92.7241	97.8231	97.8231
MC	UAE_6145_68	bd	4.71577	0.2478	#N/A	59.1074	#N/A	31.3832	383.944	11.0728	1.24014	0.0591643	0.457644	0.736721	1.32189	0.0903114	1.24014	0.938159	573.145	19.9064	557.379	13.2301	560.49	11.3241	97.2491	99.4448	99.4448
MC	UAE_6145_69	bd	7.74598	0.821922	#N/A	25.3226	#N/A	51.549	164.488	2.86527	1.71037	0.120395	0.194727	5.79354	1.72142	0.349008	1.71037	0.993581	1962.08	6.94887	1929.86	56.7995	1945.45	29.383	98.3578	99.1988	98.3578
MC	UAE_6145_70	bd	0.955338	0.0551671	#N/A	8.9154	#N/A	6.35771	57.9118	8.29847	1.21963	0.0662788	1.59085	1.10123	2.00457	0.120504	1.21963	0.608425	815.191	66.5041	733.465	16.8887	753.945	21.1136	89.9745	97.2836	97.2836
MC	UAE_6145_71	bd	1.45775	0.0862966	#N/A	12.2865	#N/A	9.70124	79.8095	7.47309	1.22991	0.0665332	1.08366	1.22755	1.63921	0.133813	1.22991	0.750309	823.194	45.2437	809.584	18.6875	813.223	18.1807	98.3466	99.5525	99.5525
MC	UAE_6145_72	bd	1.59066	0.0953366	#N/A	13.3445	#N/A	10.5857	86.682	7.41664	1.17071	0.0667954	0.999377	1.24177	1.53926	0.134832	1.17071	0.760567	831.399	41.6705	815.372	17.9083	819.683	17.169	98.0723	99.4741	99.4741
MC	UAE_6145_73	bd	1.43662	0.0759449	#N/A	17.0051	#N/A	9.56062	110.46	10.2871	1.28395	0.0598179	1.20369	0.801753	1.75994	0.0972094	1.28395	0.72954	596.995	52.1481	598.034	14.6494	597.817	15.7806	100.174	100.036	100.036
MC	UAE_6145_74	bd	3.16815	0.161306	#N/A	41.977	#N/A	21.0838	272.67	11.5701	1.23989	0.0581302	0.645902	0.692732	1.39804	0.0864296	1.23989	0.886878	534.671	28.2789	534.387	12.7047	534.441	11.5527	99.9469	99.9899	99.9899
MC	UAE_6145_75	bd	3.63217	0.214167	#N/A	31.2441	#N/A	24.1719	202.953	7.3747	1.31809	0.0664499	0.500355	1.24237	1.40987	0.135599	1.31809	0.934906	820.58	20.899	819.726	20.2602	819.956	15.7403	99.8959	99.972	99.972
MC	UAE_6145_76	610.769	6.19871	0.473695	#N/A	66.0608	#N/A	41.252	429.112	9.62051	1.51228	0.0875075	0.712872	1.25415	1.67188	0.103945	1.51228	0.90454	1371.69	27.4312	637.484	18.3323	825.275	18.7164	46.4742	77.2451	77.2451	x	x
MC	UAE_6145_77	bd	3.88343	0.214385	#N/A	40.1368	#N/A	25.844	260.717	9.12097	1.83261	0.0621536	0.517774	0.939564	1.90435	0.109637	1.83261	0.962328	679.398	22.1267	670.642	23.303	672.654	18.5632	98.7112	99.7009	99.7009
MC	UAE_6145_78	bd	3.69303	0.22421	#N/A	29.4345	#N/A	24.5769	191.198	6.87861	1.63165	0.068289	0.519899	1.36884	1.71248	0.145378	1.63165	0.952801	877.339	21.5212	875.004	26.6458	875.665	19.8994	99.7338	99.9244	99.9244
MC	UAE_6145_79	bd	13.5436	5.82317	#N/A	74.9439	#N/A	90.1318	486.814	4.87206	2.35578	0.483802	0.909814	13.6917	2.52536	0.205252	2.35578	0.932848	4192.6	26.8962	1203.47	51.5176	2728.62	46.7028	28.7047	44.1056	28.7047	x	x
MC	UAE_6145_80	bd	1.24008	0.0550542	#N/A	54.1585	#N/A	8.25265	351.798	37.2909	1.32484	0.0491396	1.61748	0.18169	2.0908	0.0268162	1.32484	0.633652	154.495	75.7541	170.591	4.4593	169.513	6.5074	110.419	100.636	100.636
MC	UAE_6145_81	bd	2.08982	0.110721	#N/A	24.4387	#N/A	13.9076	158.747	10.0714	1.15397	0.0595551	0.882911	0.815323	1.45299	0.0992909	1.15397	0.794204	587.45	38.3122	610.252	13.4242	605.436	13.1668	103.881	100.795	100.795
MC	UAE_6145_82	bd	0.955803	0.0503591	#N/A	11.5169	#N/A	6.36081	74.8104	10.0931	1.97441	0.0594257	1.74948	0.811803	2.63798	0.0990774	1.97441	0.748453	582.729	75.9754	609	22.9065	603.465	23.724	104.508	100.917	100.917
MC	UAE_6145_83	bd	4.61754	0.248665	#N/A	50.8429	#N/A	30.7294	330.261	9.53748	1.50469	0.0606993	0.447335	0.877509	1.56978	0.10485	1.50469	0.958537	628.596	19.278	642.767	18.3839	639.636	14.7911	102.254	100.489	100.489
MC	UAE_6145_84	bd	4.7448	0.253348	#N/A	54.7078	#N/A	31.5763	355.366	9.77845	1.68176	0.0601117	0.482383	0.847599	1.74958	0.102266	1.68176	0.96124	607.599	20.8614	627.673	20.0854	623.33	16.1701	103.304	100.697	100.697
MC	UAE_6145_85	bd	10.9598	1.68788	#N/A	35.8658	#N/A	72.9368	232.974	2.84603	1.07776	0.172333	0.316652	8.34892	1.12332	0.351366	1.07776	0.959447	2580.43	10.5763	1941.12	36.0283	2269.65	20.1702	75.2246	85.5252	75.2246	x	x
MC	UAE_6145_86	bd	1.91022	0.109111	#N/A	18.4962	#N/A	12.7124	120.146	8.46707	1.47166	0.0636084	0.902886	1.03582	1.72656	0.118105	1.47166	0.852369	728.636	38.2744	719.645	20.0109	721.832	17.6847	98.7661	99.6969	99.6969
MC	UAE_6145_87	bd	1.38167	0.0880902	#N/A	10.0086	#N/A	9.19493	65.013	6.30491	1.35964	0.0719063	1.09404	1.5725	1.74515	0.158607	1.35964	0.779099	983.288	44.5497	949.029	23.9525	959.411	21.4356	96.5158	98.9178	98.9178
MC	UAE_6145_88	bd	1.17878	0.0623001	#N/A	13.7572	#N/A	7.84471	89.3628	10.0231	1.22048	0.0596109	1.46548	0.820022	1.90714	0.0997697	1.22048	0.639953	589.479	63.5697	613.059	14.2592	608.061	17.3016	104	100.822	100.822
MC	UAE_6145_89	bd	4.66301	0.409937	#N/A	19.1173	#N/A	31.032	124.18	3.50636	1.65214	0.0989239	0.303618	3.88996	1.6798	0.285196	1.65214	0.98353	1603.93	11.3248	1617.48	47.0956	1611.6	26.7805	100.844	100.365	100.844
MC	UAE_6145_90	bd	15.9176	2.47668	#N/A	51.9943	#N/A	105.931	337.74	2.83057	1.81399	0.175269	0.15778	8.53754	1.82084	0.353286	1.81399	0.996239	2608.6	5.25557	1950.27	60.7674	2289.93	32.5719	74.7629	85.1673	74.7629	x	x
MC	UAE_6145_91	bd	0.606472	0.0256719	#N/A	27.2075	#N/A	4.03603	176.732	38.2468	1.81514	0.0481241	3.12245	0.173488	3.61171	0.026146	1.81514	0.50257	105.374	147.576	166.382	5.96009	162.441	10.7858	157.897	102.426	102.426
MC	UAE_7019 _01	bd	7.0881	0.394102	#N/A	64.3152	#N/A	53.0703	497.127	8.98189	1.04619	0.0613946	0.30406	0.942462	1.08948	0.111335	1.04619	0.960266	653.089	13.0503	680.497	13.4987	674.17	10.6784	104.197	100.938	100.938
MC	UAE_7019 _02	bd	18.7755	1.34431	#N/A	99.5046	#N/A	140.577	769.125	5.22995	1.1044	0.0789647	0.130551	2.08179	1.11209	0.191207	1.1044	0.993086	1171.25	5.16883	1127.91	22.8152	1142.83	15.1423	96.2994	98.6947	96.2994
MC	UAE_7019 _03	bd	4.88727	0.540708	#N/A	14.0966	#N/A	36.5921	108.96	2.81769	1.23074	0.122247	0.239772	5.98197	1.25388	0.3549	1.23074	0.981546	1989.27	8.52919	1957.96	41.4303	1973.23	21.5853	98.4257	99.2261	98.4257
MC	UAE_7019 _04	bd	1.34423	0.06086	#N/A	50.8423	#N/A	10.0646	392.987	37.4159	1.1021	0.0497719	1.47299	0.183413	1.83965	0.0267266	1.1021	0.599078	184.355	68.6093	170.029	3.6977	170.993	5.77369	92.2287	99.436	99.436
MC	UAE_7019 _05	bd	0.521104	0.0285647	#N/A	5.06059	#N/A	3.90163	39.116	9.639	1.10872	0.0602627	2.81086	0.862022	3.02162	0.103745	1.10872	0.366928	613.021	121.45	636.32	13.422	631.226	28.0174	103.801	100.807	100.807
MC	UAE_7019 _06	bd	1.8765	0.104174	#N/A	17.9309	#N/A	14.0498	138.598	9.42828	1.04255	0.0610789	0.940528	0.893223	1.4041	0.106064	1.04255	0.742504	642.013	40.4419	649.848	12.8766	648.099	13.3646	101.22	100.27	100.27
MC	UAE_7019 _07	bd	2.79954	0.170312	#N/A	22.4441	#N/A	20.9608	173.483	7.97406	1.05204	0.067097	0.637585	1.16018	1.23016	0.125407	1.05204	0.855203	840.787	26.5455	761.608	15.0967	782.039	13.3292	90.5827	97.3874	97.3874
MC	UAE_7019 _08	bd	0.0758412	0.0491663	#N/A	1.23556	#N/A	0.567841	9.55031	15.9804	1.57865	0.724765	1.78543	6.25333	2.38325	0.0625767	1.57865	0.662393	4780.62	51.1895	391.277	11.9752	2011.94	40.8911	8.18465	19.4477	19.4477	x	x
MC	UAE_7019 _09	bd	2.9164	0.196399	#N/A	16.8682	#N/A	21.8358	130.383	5.74945	1.07659	0.0742405	0.52901	1.78039	1.19954	0.17393	1.07659	0.897502	1048.01	21.3309	1033.73	20.5323	1038.32	15.4799	98.637	99.5574	98.637
MC	UAE_7019 _10	bd	6.5507	1.03605	#N/A	13.342	#N/A	49.0466	103.127	2.00436	1.14712	0.174539	0.144379	12.0066	1.15617	0.498913	1.14712	0.992172	2601.65	4.81243	2609.12	49.0404	2604.92	21.4459	100.287	100.161	100.287
MC	UAE_7019 _11	bd	0.157635	0.00671168	#N/A	28.1696	#N/A	1.18025	217.738	177.362	1.18688	0.0470206	9.98766	0.0365534	10.0579	0.00563817	1.18688	0.118004	50.2721	476.937	36.2439	0.85787	36.4534	7.17743	72.0955	99.4253	99.4253
MC	UAE_7019 _12	bd	2.56437	0.142922	#N/A	24.78	#N/A	19.2	191.538	9.53417	1.11494	0.0615469	0.704621	0.890071	1.31893	0.104886	1.11494	0.845335	658.404	30.2159	642.978	13.6314	646.408	12.5356	97.6572	99.4695	99.4695
MC	UAE_7019 _13	bd	1.2284	0.0683255	#N/A	11.7397	#N/A	9.19732	90.7425	9.55213	1.02963	0.061467	1.31631	0.887244	1.67117	0.104689	1.02963	0.616114	655.616	56.4728	641.828	12.568	644.887	15.8309	97.897	99.5256	99.5256
MC	UAE_7019 _14	bd	1.2987	0.0781433	#N/A	9.6392	#N/A	9.72367	74.5066	7.43427	1.13167	0.0660115	1.17617	1.22428	1.63219	0.134512	1.13167	0.693344	806.74	49.2351	813.555	17.2758	811.733	18.0822	100.845	100.224	100.224
MC	UAE_7019 _15	bd	2.31328	0.138413	#N/A	17.2886	#N/A	17.3201	133.633	7.3974	1.1029	0.0660226	0.722681	1.23059	1.31858	0.135183	1.1029	0.83643	807.093	30.2502	817.364	16.911	814.609	14.6663	101.273	100.338	100.338
MC	UAE_7019 _16	bd	3.22031	0.176683	#N/A	32.2463	#N/A	24.1112	249.249	9.82028	1.16653	0.0605673	0.576676	0.850386	1.30128	0.10183	1.16653	0.896443	623.904	24.8714	625.125	13.8847	624.861	12.0726	100.196	100.042	100.042
MC	UAE_7019 _17	bd	8.03445	0.427422	#N/A	91.8024	#N/A	60.1558	709.59	11.1199	1.07544	0.058581	0.281741	0.726369	1.11174	0.089929	1.07544	0.967355	551.558	12.2999	555.117	11.4302	554.42	9.455	100.645	100.126	100.126
MC	UAE_7019 _18	bd	0.44369	0.0187995	#N/A	29.0258	#N/A	3.32201	224.356	62.2714	1.10734	0.047326	4.04161	0.104788	4.19056	0.0160587	1.10734	0.264246	65.7086	192.439	102.699	2.25603	101.187	8.03979	156.294	101.494	101.494
MC	UAE_7019 _19	bd	0.181577	0.0079424	#N/A	23.45	#N/A	1.35951	181.258	123.911	1.0401	0.0487499	8.6681	0.0542455	8.73028	0.00807028	1.0401	0.119138	135.821	407.369	51.8155	1.07346	53.6379	9.08168	38.1499	96.6024	96.6024
MC	UAE_7019 _20	bd	2.17702	0.127275	#N/A	20.2915	#N/A	16.2999	156.844	8.66232	1.3733	0.063738	0.76642	1.01453	1.57269	0.115442	1.3733	0.873218	732.949	32.4666	704.278	18.2985	711.161	15.958	96.0883	99.0322	99.0322
MC	UAE_7019 _21	bd	7.76468	1.50314	#N/A	14.443	#N/A	58.136	111.638	1.75995	1.07538	0.213739	0.159328	16.745	1.08712	0.568197	1.07538	0.989202	2934.11	5.15141	2900.41	50.0404	2920.34	20.6218	98.8515	99.3175	98.8515
MC	UAE_7019 _22	bd	5.63285	0.952501	#N/A	12.0635	#N/A	42.1745	93.2453	2.07035	1.09762	0.186576	0.179333	12.4255	1.11217	0.483011	1.09762	0.986914	2712.22	5.91515	2540.37	45.9267	2637.11	20.6911	93.6639	96.3314	93.6639		x
MC	UAE_7019 _23	bd	20.9819	3.21013	#N/A	51.7035	#N/A	157.096	399.644	2.3005	1.85072	0.169016	0.120268	10.13	1.85463	0.434689	1.85072	0.997895	2547.93	4.02977	2326.82	71.893	2446.71	33.7133	91.3221	95.0999	91.3221		x
MC	UAE_7019 _24	bd	1.49414	0.0915457	#N/A	11.0976	#N/A	11.187	85.7793	7.07212	1.30317	0.0675263	1.01625	1.31651	1.65258	0.1414	1.30317	0.788566	854.049	42.2224	852.576	20.7807	852.985	18.8958	99.8275	99.952	99.952
MC	UAE_7019 _25	bd	4.17838	0.257076	#N/A	31.019	#N/A	31.2845	239.763	7.01752	1.21263	0.0678531	0.42896	1.33317	1.28627	0.1425	1.21263	0.942753	864.069	17.7939	858.786	19.4707	860.263	14.817	99.3886	99.8284	99.8284
MC	UAE_7019 _26	bd	6.2424	0.352078	#N/A	64.5814	#N/A	46.7383	499.184	9.78888	1.15524	0.0621878	0.340383	0.875937	1.20434	0.102157	1.15524	0.959229	680.572	14.5432	627.036	13.7905	638.786	11.3562	92.1336	98.1605	98.1605
MC	UAE_7019 _27	bd	3.23392	0.179693	#N/A	32.5874	#N/A	24.2131	251.886	9.58035	1.08663	0.0609341	0.585121	0.87696	1.23416	0.10438	1.08663	0.880468	636.908	25.1811	640.028	13.2277	639.34	11.6429	100.49	100.108	100.108
MC	UAE_7019 _28	bd	2.13809	0.123792	#N/A	18.3617	#N/A	16.0084	141.927	8.119	1.16566	0.0639031	0.783959	1.08523	1.40476	0.123168	1.16566	0.829792	738.424	33.1801	748.771	16.4596	746.182	14.7392	101.401	100.347	100.347
MC	UAE_7019 _29	bd	2.19994	0.129031	#N/A	18.1123	#N/A	16.4715	140	7.78947	1.14468	0.0651737	0.756663	1.15363	1.37216	0.128378	1.14468	0.834215	779.948	31.8107	778.608	16.7689	778.955	14.8179	99.8282	99.9555	99.9555
MC	UAE_7019 _30	bd	0.32784	0.0192423	#N/A	2.64121	#N/A	2.45461	20.4153	7.47608	1.2089	0.0650905	3.97205	1.20045	4.15194	0.13376	1.2089	0.291164	777.263	167.06	809.279	18.3622	800.795	44.9871	104.119	101.059	101.059
MC	UAE_7019 _31	348.798	0.377449	0.0171917	#N/A	24.9115	#N/A	2.82605	192.554	62.2135	1.14892	0.0497303	4.3934	0.110214	4.54115	0.0160737	1.14892	0.253003	182.408	204.71	102.794	2.34288	106.161	9.11395	56.3537	96.8277	96.8277
MC	UAE_7019 _32	bd	2.01266	0.131604	#N/A	13.0064	#N/A	15.0693	100.533	6.06347	1.22778	0.072101	0.755043	1.63954	1.44137	0.164922	1.22778	0.851818	988.792	30.7198	984.073	22.3716	985.535	18.0206	99.5227	99.8517	99.8517
MC	UAE_7019 _33	bd	3.02968	0.455825	#N/A	6.66973	#N/A	22.6839	51.5539	2.07609	1.12667	0.166028	0.270865	11.0265	1.15878	0.481674	1.12667	0.972296	2518	9.10262	2534.55	47.0501	2525.37	21.3493	100.657	100.364	100.657
MC	UAE_7019 _34	bd	2.04601	0.309744	#N/A	4.2839	#N/A	15.319	33.1126	1.98733	1.23236	0.166158	0.366549	11.528	1.28572	0.503189	1.23236	0.9585	2519.31	12.3165	2627.48	52.9684	2566.85	23.7459	104.294	102.362	104.294
MC	UAE_7019 _35	348.297	4.82308	0.648513	#N/A	15.8617	#N/A	36.1115	122.604	3.07932	1.25326	0.148345	0.283317	6.64232	1.28489	0.324747	1.25326	0.975387	2326.94	9.70854	1812.87	39.4885	2064.99	22.4292	77.908	87.791	77.908	x	x
MC	UAE_7019 _36	bd	0.328282	0.0221304	#N/A	1.98784	#N/A	2.45792	15.3651	5.65128	1.30254	0.0734598	3.50871	1.79227	3.74268	0.176951	1.30254	0.348023	1026.66	141.936	1050.3	25.1991	1042.65	47.6495	102.302	100.733	102.302
MC	UAE_7019 _37	bd	4.40697	0.242282	#N/A	45.8398	#N/A	32.996	354.32	9.63843	1.44986	0.0607417	0.470034	0.868924	1.52415	0.103751	1.44986	0.95126	630.1	20.2512	636.356	17.5472	634.983	14.2896	100.993	100.216	100.216
MC	UAE_7019 _38	bd	3.15822	0.164214	#N/A	46.3257	#N/A	23.6463	358.076	13.6401	1.45257	0.0565058	0.633214	0.571183	1.58459	0.073313	1.45257	0.916687	472.298	28.0212	456.085	12.7794	458.78	11.6315	96.5671	99.4126	99.4126
MC	UAE_7019 _39	448.126	2.82453	0.170394	#N/A	27.8031	#N/A	18.6989	199.929	9.73926	1.29897	0.0667365	0.691255	0.944798	1.47145	0.102677	1.29897	0.882784	829.562	28.8313	630.079	15.5757	675.39	14.4139	75.9533	93.2912	93.2912		x
MC	UAE_7019 _40	bd	3.73825	0.237852	#N/A	32.4443	#N/A	24.7479	233.304	8.32498	1.5902	0.0699269	0.795417	1.15814	1.77804	0.12012	1.5902	0.894356	926.207	32.676	731.256	21.9489	781.081	19.1943	78.9518	93.621	93.621		x
MC	UAE_7019 _41	bd	0.780736	0.0481244	#N/A	5.91547	#N/A	5.16861	42.5375	7.3425	1.22821	0.0668675	1.83382	1.25566	2.20713	0.136193	1.22821	0.556475	833.651	76.4367	823.101	18.9534	825.957	24.6493	98.7345	99.6543	99.6543
MC	UAE_7019 _42	bd	2.87382	0.152561	#N/A	32.501	#N/A	19.0252	233.711	11.1289	1.15349	0.0585419	0.662083	0.725295	1.33	0.089856	1.15349	0.867287	550.1	28.9115	554.686	12.2497	553.788	11.2913	100.834	100.162	100.162
MC	UAE_7019 _43	bd	0.430885	0.0262168	#N/A	3.24733	#N/A	2.85253	23.3512	7.49555	1.1851	0.0671792	3.02857	1.23576	3.25218	0.133412	1.1851	0.364402	843.334	126.042	807.304	17.96	816.956	35.8633	95.7277	98.8185	98.8185
MC	UAE_7019 _44	bd	7.31986	0.42013	#N/A	67.9441	#N/A	48.4588	488.579	9.0846	1.83153	0.063411	0.293937	0.962411	1.85496	0.110076	1.83153	0.987365	722.045	12.4737	673.192	23.3731	684.544	18.3082	93.234	98.3415	98.3415
MC	UAE_7019 _45	345.566	7.45555	0.339173	#N/A	282.883	#N/A	49.3571	2034.18	36.8252	1.34794	0.0502592	0.380249	0.188179	1.40055	0.0271553	1.34794	0.962438	206.997	17.6382	172.72	4.59285	175.074	4.49454	83.4406	98.6551	98.6551
MC	UAE_7019 _46	bd	1.64682	0.10215	#N/A	11.4249	#N/A	10.9022	82.1553	6.71022	2.0033	0.068588	0.930704	1.40933	2.20894	0.149026	2.0033	0.906905	886.374	38.4719	895.503	33.4119	892.875	25.9065	101.03	100.294	100.294
MC	UAE_7019 _47	bd	1.35756	0.0746643	#N/A	13.6319	#N/A	8.98729	98.0256	9.74321	1.25576	0.0611211	1.21536	0.864949	1.74758	0.102636	1.25576	0.718572	643.499	52.2465	629.836	15.0527	632.821	16.3276	97.8767	99.5283	99.5283
MC	UAE_7019 _48	359.444	0.720439	0.0409131	#N/A	7.08097	#N/A	4.76943	50.9185	9.70508	1.45226	0.0623564	2.09791	0.885897	2.55152	0.103039	1.45226	0.569174	686.354	89.5499	632.193	17.4668	644.163	24.0531	92.1088	98.1418	98.1418
MC	UAE_7019 _49	363.657	5.36194	0.40524	#N/A	34.7348	#N/A	35.497	249.774	6.12863	3.5116	0.0828409	0.429949	1.86373	3.53782	0.163169	3.5116	0.992588	1265.47	16.793	974.361	63.1999	1068.31	45.7124	76.996	91.2059	91.2059		x
MC	UAE_7019 _50	bd	8.58025	0.391932	#N/A	304.052	#N/A	56.8028	2186.41	34.7673	1.08336	0.0502417	0.323864	0.199248	1.13073	0.0287627	1.08336	0.958104	206.189	15.0249	182.8	3.90393	184.49	3.80794	88.6563	99.0838	99.0838
MC	UAE_7019 _51	bd	1.88676	0.110948	#N/A	16.3401	#N/A	12.4907	117.5	8.47088	1.17175	0.0649716	0.869584	1.05754	1.45917	0.118051	1.17175	0.803027	773.416	36.5964	719.339	15.9315	732.609	15.1174	93.008	98.1886	98.1886
MC	UAE_7019 _52	bd	2.1897	0.128926	#N/A	15.7495	#N/A	14.4962	113.253	7.1429	1.21638	0.0650259	0.765983	1.2552	1.43747	0.139999	1.21638	0.846198	775.174	32.2273	844.657	19.2305	825.748	16.1189	108.964	102.29	102.29
MC	UAE_7019 _53	bd	8.63745	0.510994	#N/A	66.3581	#N/A	57.1814	477.174	7.72134	1.3003	0.0652881	0.25919	1.16585	1.32588	0.129511	1.3003	0.980707	783.635	10.8901	785.077	19.1938	784.701	14.3912	100.184	100.048	100.048
MC	UAE_7019 _54	bd	17.2697	2.59164	#N/A	36.018	#N/A	114.328	259.002	2.07196	1.15344	0.165587	0.0841382	11.0191	1.1565	0.482635	1.15344	0.99735	2513.52	2.82878	2538.73	48.2283	2524.74	21.3067	101.003	100.554	101.003
MC	UAE_7019 _55	bd	13.9584	2.26355	#N/A	28.0502	#N/A	92.4071	201.706	1.98563	1.04083	0.178711	0.116322	12.4096	1.04731	0.50362	1.04083	0.993813	2640.95	3.86265	2629.33	44.7901	2635.9	19.494	99.5601	99.7508	99.5601
MC	UAE_7019 _56	bd	0.413771	0.0227756	#N/A	4.17899	#N/A	2.73924	30.0507	10.0215	1.0958	0.0604961	3.48282	0.832329	3.65113	0.0997852	1.0958	0.300125	621.366	150.274	613.15	12.8058	614.904	33.134	98.6777	99.7148	99.7148
MC	UAE_7019 _57	bd	1.13028	0.0679372	#N/A	10.8701	#N/A	7.48265	78.1658	9.60238	1.18141	0.0661729	1.77539	0.950173	2.13255	0.104141	1.18141	0.553992	811.851	74.2584	638.63	14.3504	678.193	20.884	78.6635	94.1665	94.1665		x
MC	UAE_7019 _58	bd	1.58683	0.0964921	#N/A	11.3677	#N/A	10.5051	81.744	7.14016	1.07374	0.0671331	0.97302	1.29637	1.44903	0.140053	1.07374	0.741006	841.905	40.504	844.962	16.9841	844.119	16.4777	100.363	100.1	100.1
MC	UAE_7019_60	bd	12.4574	1.27871	#N/A	37.982	#N/A	82.4702	273.125	3.01468	1.10997	0.113349	0.136748	5.18416	1.11836	0.33171	1.10997	0.992496	1853.79	4.94323	1846.66	35.5476	1850.02	18.8625	99.6155	99.8187	99.6155
MC	UAE_7019_61	bd	2.03531	0.116388	#N/A	20.405	#N/A	13.4741	146.73	10.0097	1.15853	0.0635125	1.64074	0.874863	2.00854	0.0999033	1.15853	0.576803	725.435	69.5894	613.842	13.5527	638.205	18.857	84.6171	96.1827	96.1827
MC	UAE_7019_62	bd	8.7021	0.529067	#N/A	71.3526	#N/A	57.6094	513.089	8.15197	1.44653	0.0674722	0.400371	1.1412	1.50092	0.12267	1.44653	0.963766	852.384	16.6387	745.911	20.3459	773.081	16.1165	87.5088	96.4856	96.4856
MC	UAE_7019_64	bd	4.22007	0.232053	#N/A	40.6	#N/A	27.9376	291.95	9.43238	1.08368	0.0606945	0.456728	0.887215	1.176	0.106018	1.08368	0.921501	628.423	19.6834	649.579	13.3788	644.872	11.1656	103.366	100.73	100.73
MC	UAE_7019_65	bd	9.05756	1.47521	#N/A	17.9758	#N/A	59.9626	129.262	1.96965	1.10084	0.179998	0.11148	12.6003	1.10647	0.507705	1.10084	0.994912	2652.85	3.69766	2646.82	47.617	2650.24	20.6071	99.7728	99.8711	99.7728
MC	UAE_7019_66	bd	0.691932	0.0404087	#N/A	5.45084	#N/A	4.58071	39.1964	7.79704	1.14514	0.0642887	2.08724	1.13686	2.38074	0.128254	1.14514	0.481002	751.142	88.1579	777.896	16.7612	771.017	25.4014	103.562	100.892	100.892
MC	UAE_7019_67	bd	1.85772	0.0990147	#N/A	20.394	#N/A	12.2984	146.651	10.8766	1.08539	0.0587355	0.944489	0.744574	1.43879	0.0919403	1.08539	0.754373	557.305	41.1932	567.002	11.7718	565.071	12.3943	101.74	100.342	100.342
MC	UAE_7019_68	bd	1.74631	0.115092	#N/A	21.5452	#N/A	11.5609	154.929	11.5364	2.40289	0.0670285	2.37906	0.801104	3.38139	0.0866819	2.40289	0.710623	838.658	99.0842	535.884	24.6648	597.451	30.0922	63.8978	89.6949	89.6949	x	x
MC	UAE_7019_69	bd	2.74322	0.159704	#N/A	21.6307	#N/A	18.1606	155.544	7.86109	1.04619	0.0642555	0.648127	1.12701	1.23069	0.127209	1.04619	0.850089	750.051	27.3795	771.922	15.2041	766.328	13.1568	102.916	100.73	100.73
MC	UAE_7019_70	bd	0.837978	0.0515068	#N/A	5.90368	#N/A	5.54756	42.4528	7.01186	1.15092	0.067823	1.67671	1.33366	2.03371	0.142615	1.15092	0.56592	863.149	69.5627	859.435	18.4942	860.473	23.3322	99.5697	99.8793	99.8793
MC	UAE_7019_71	bd	1.04415	0.0646758	#N/A	6.3164	#N/A	6.91246	45.4206	5.94433	1.45404	0.0682051	1.38838	1.58203	2.01043	0.168228	1.45404	0.723249	874.794	57.4948	1002.34	26.9393	963.169	24.7119	114.58	104.067	114.58	x	x
MC	UAE_7019_72	bd	0.385223	0.0202478	#N/A	3.99745	#N/A	2.55024	28.7453	10.1075	1.48511	0.057995	3.81388	0.791127	4.09283	0.0989361	1.48511	0.362856	529.572	167.125	608.171	17.215	591.811	36.0635	114.842	102.764	102.764
MC	UAE_7019_73	bd	2.12187	0.139994	#N/A	11.6789	#N/A	14.0472	83.9818	5.3634	1.10614	0.0729393	0.743156	1.87509	1.33261	0.186449	1.10614	0.830062	1012.27	30.1282	1102.11	22.3726	1072.33	17.4979	108.875	102.777	108.875		x
MC	UAE_7019_74	bd	3.12718	0.174585	#N/A	28.7927	#N/A	20.7025	207.045	8.94154	1.30622	0.0612119	0.577493	0.943898	1.42818	0.111838	1.30622	0.914602	646.69	24.8125	683.411	16.9177	674.92	13.9862	105.678	101.258	101.258
MC	UAE_7019_75	bd	16.1653	1.08281	#N/A	96.8037	#N/A	107.017	696.106	5.82145	1.20722	0.0738791	0.158341	1.74981	1.21756	0.171778	1.20722	0.991508	1038.17	6.39414	1021.9	22.7767	1027.09	15.6134	98.4333	99.4946	98.4333
MC	UAE_7019_76	bd	1.28001	0.0715731	#N/A	12.3632	#N/A	8.47389	88.9025	9.35921	1.11981	0.0620206	1.27393	0.913688	1.69613	0.106847	1.11981	0.660214	674.821	54.4813	654.408	13.9218	659.017	16.3137	96.9751	99.3007	99.3007
MC	UAE_7019_77	bd	6.68037	0.439195	#N/A	42.6034	#N/A	44.2252	306.357	6.13398	1.0669	0.0725018	0.283346	1.6297	1.10389	0.163026	1.0669	0.966496	1000.06	11.5085	973.573	19.2527	981.744	13.7985	97.3513	99.1677	99.1677
MC	UAE_7019_78	bd	8.48702	0.555912	#N/A	52.5597	#N/A	56.1856	377.951	6.01364	1.1444	0.0722632	0.233603	1.65684	1.168	0.166289	1.1444	0.979795	993.363	9.49778	991.63	21.0026	992.17	14.685	99.8256	99.9456	99.9456
MC	UAE_7019_79	bd	0.866867	0.0475412	#N/A	9.12884	#N/A	5.73881	65.6446	10.1274	1.22518	0.0600701	1.80353	0.817829	2.18032	0.0987423	1.22518	0.561928	606.099	78.0161	607.034	14.1801	606.837	19.7271	100.154	100.033	100.033
MC	UAE_7019_80	bd	3.01767	0.181799	#N/A	22.1617	#N/A	19.9775	159.363	7.16275	1.12504	0.066586	0.56858	1.28175	1.26056	0.139611	1.12504	0.892496	824.851	23.7325	842.463	17.7452	837.634	14.2791	102.135	100.577	100.577
MC	UAE_7019_82	bd	1.3302	0.076376	#N/A	11.0988	#N/A	8.80616	79.8103	8.12298	1.17082	0.0631347	1.1778	1.07165	1.66073	0.123107	1.17082	0.705002	712.771	50.0577	748.425	16.5251	739.551	17.2979	105.002	101.2	101.2
MC	UAE_7019_83	bd	1.89863	0.10516	#N/A	18.1827	#N/A	12.5693	130.75	9.40607	1.16899	0.0609364	0.892823	0.893244	1.47094	0.106314	1.16899	0.794722	636.99	38.4227	651.308	14.4672	648.11	13.9966	102.248	100.493	100.493
MC	UAE_7019_84	bd	18.6586	5.48579	#N/A	29.7476	#N/A	123.523	213.912	1.55451	1.1102	0.324514	0.081512	28.7834	1.11318	0.64329	1.1102	0.997316	3591.36	2.50345	3201.93	55.7904	3446.16	21.6154	89.1565	92.9131	89.1565	x	x
MC	UAE_7019_85	bd	1.14978	0.0647579	#N/A	10.2953	#N/A	7.61175	74.0324	8.84681	1.12705	0.0620348	1.37974	0.96683	1.78155	0.113035	1.12705	0.632623	675.31	59.0017	690.35	14.74	686.829	17.6305	102.227	100.513	100.513
MC	UAE_7019_86	bd	3.42281	0.196911	#N/A	28.9698	#N/A	22.6596	208.319	8.28617	1.13854	0.0635157	0.555278	1.05689	1.26673	0.120683	1.13854	0.898802	725.542	23.5508	734.494	15.788	732.288	13.1326	101.234	100.301	100.301
MC	UAE_7019_87	bd	1.9513	0.10256	#N/A	22.2909	#N/A	12.9179	160.292	11.152	1.17803	0.058011	0.92593	0.71723	1.49836	0.0896699	1.17803	0.786209	530.176	40.5701	553.585	12.4863	549.03	12.63	104.415	100.83	100.83
MC	UAE_7019_88	bd	2.37181	0.12943	#N/A	24.0564	#N/A	15.7018	172.987	9.94811	1.08572	0.0602467	0.75922	0.835014	1.32484	0.100522	1.08572	0.81951	612.446	32.8071	617.465	12.7731	616.39	12.1695	100.819	100.174	100.174
MC	UAE_7019_89	bd	2.47895	0.162169	#N/A	17.7197	#N/A	16.4111	127.421	6.90341	1.17164	0.073138	2.1359	1.46077	2.43615	0.144856	1.17164	0.480941	1017.78	86.519	872.064	19.0847	914.325	28.9513	85.6829	95.3778	95.3778
MC	UAE_7019_90	bd	3.27461	0.175896	#N/A	32.348	#N/A	21.6785	232.611	9.6382	1.08378	0.0612801	0.613539	0.876648	1.2454	0.103754	1.08378	0.87023	649.082	26.3507	636.37	13.1214	639.171	11.7462	98.0417	99.5619	99.5619
MC	UAE_7019_91	bd	3.20991	0.176122	#N/A	31.9966	#N/A	21.2502	230.084	9.68475	1.28337	0.060166	0.595186	0.856572	1.41467	0.103255	1.28337	0.907189	609.549	25.7314	633.457	15.4673	628.25	13.1688	103.922	100.829	100.829
MC	UAE 7007_01	bd	0.853146	0.0469894	#N/A	8.70512	#N/A	6.26937	64.887	9.5193	1.1905	0.0614677	1.8046	0.890314	2.16191	0.10505	1.1905	0.550669	655.64	77.4211	643.934	14.5746	646.538	20.4702	98.2146	99.5973	99.5973
MC	UAE 7007_02	bd	6.181	0.405893	#N/A	42.1976	#N/A	45.4213	314.536	6.4636	1.09033	0.073214	0.304937	1.56178	1.13217	0.154712	1.09033	0.963046	1019.88	12.3482	927.325	18.8073	955.174	13.921	90.9248	97.0844	97.0844
MC	UAE 7007_03	bd	1.1379	0.0622091	#N/A	12.3422	#N/A	8.3619	91.9974	9.99879	1.39545	0.0614857	1.41719	0.847868	1.98889	0.100012	1.39545	0.701621	656.269	60.794	614.48	16.3368	623.478	18.3652	93.6323	98.5568	98.5568
MC	UAE 7007_04	bd	1.19244	0.0659965	#N/A	12.1557	#N/A	8.76269	90.6073	9.51698	1.10074	0.0621483	1.35797	0.900391	1.74806	0.105075	1.10074	0.629693	679.215	58.0335	644.084	13.4799	651.937	16.6814	94.8278	98.7955	98.7955
MC	UAE 7007_05	bd	1.47369	0.0800879	#N/A	14.1889	#N/A	10.8295	105.763	9.2552	1.25156	0.0615643	1.14585	0.91716	1.69687	0.108047	1.25156	0.73757	659.01	49.1319	661.398	15.7154	660.857	16.3528	100.362	100.082	100.082
MC	UAE 7007_06	bd	15.5734	1.7878	#N/A	54.1863	#N/A	114.442	403.899	3.23866	1.37533	0.127829	0.111988	5.44208	1.37988	0.308769	1.37533	0.996701	2068.33	3.94758	1734.65	41.6984	1891.51	23.4005	83.867	91.7071	83.867	x	x
MC	UAE 7007_07	938.814	22.0402	3.68415	#N/A	89.4047	#N/A	161.963	666.413	3.81336	1.33608	0.187676	0.0932782	6.78581	1.33934	0.262236	1.33608	0.997572	2721.9	3.07393	1501.27	35.6887	2083.87	23.4329	55.1553	72.0423	55.1553	x	x
MC	UAE 7007_08	bd	6.68789	0.443976	#N/A	70.7853	#N/A	49.1462	527.626	9.7814	1.15733	0.0744978	0.268731	1.05013	1.18812	0.102235	1.15733	0.974085	1054.98	10.8245	627.493	13.8249	728.947	12.2843	59.4789	86.082	86.082	x	x
MC	UAE 7007_09	bd	20.8402	2.32905	#N/A	60.6197	#N/A	153.145	451.853	2.70599	1.32096	0.125435	0.0927319	6.39138	1.32421	0.369551	1.32096	0.997545	2034.95	3.2813	2027.29	45.792	2031.09	22.991	99.6236	99.813	99.6236
MC	UAE 7007_10	bd	0.832387	0.0447066	#N/A	8.50723	#N/A	6.11683	63.412	9.51028	1.23546	0.0602236	1.91015	0.873122	2.27487	0.105149	1.23546	0.543092	611.618	82.5518	644.516	15.1375	637.261	21.3089	105.379	101.138	101.138
MC	UAE 7007_11	bd	3.86448	0.202493	#N/A	42.335	#N/A	28.3983	315.561	10.617	1.09874	0.0587019	0.524892	0.762342	1.21768	0.0941881	1.09874	0.902324	556.059	22.8976	580.259	12.1825	575.36	10.6408	104.352	100.851	100.851
MC	UAE 7007_12	bd	4.11005	0.221511	#N/A	43.4621	#N/A	30.2029	323.962	10.1528	1.07965	0.0604284	0.488154	0.820644	1.18488	0.0984947	1.07965	0.911189	618.948	21.071	605.581	12.4688	608.408	10.7883	97.8403	99.5354	99.5354
MC	UAE 7007_13	bd	3.86197	0.214259	#N/A	38.6548	#N/A	28.3798	288.129	9.61949	1.11721	0.0621285	0.504861	0.890512	1.22599	0.103956	1.11721	0.911275	678.533	21.5779	637.549	13.5495	646.644	11.6603	93.9598	98.5934	98.5934
MC	UAE 7007_14	bd	3.29599	0.186115	#N/A	29.7357	#N/A	24.2207	221.647	8.72845	1.11372	0.0632732	0.556081	0.999502	1.24483	0.114568	1.11372	0.894678	717.426	23.616	699.221	14.743	703.557	12.5587	97.4626	99.3838	99.3838
MC	UAE 7007_15	bd	1.84909	0.265966	#N/A	4.97137	#N/A	13.5881	37.0561	2.53969	1.26807	0.161004	0.544816	8.74094	1.38015	0.393748	1.26807	0.918789	2466.24	18.4038	2140.19	46.023	2311.35	24.844	86.7795	92.5946	86.7795	x	x
MC	UAE 7007_16	bd	1.29951	0.0762731	#N/A	10.2958	#N/A	9.5495	76.7438	7.56043	1.08039	0.0660994	1.22109	1.20546	1.63043	0.132268	1.08039	0.66264	809.525	51.093	800.788	16.2512	803.102	17.938	98.9208	99.7119	99.7119
MC	UAE 7007_17	bd	1.18903	0.0508557	#N/A	79.6727	#N/A	8.73763	593.872	63.3567	1.1004	0.0473897	1.72428	0.103132	2.04549	0.0157837	1.1004	0.537966	68.912	82.051	100.953	2.2041	99.6632	3.87608	146.496	101.294	101.294
MC	UAE 7007_18	bd	4.11671	0.402142	#N/A	14.2964	#N/A	30.2518	106.564	3.29689	1.09183	0.108745	0.289404	4.54785	1.12953	0.303316	1.09183	0.96662	1778.5	10.5583	1707.73	32.6773	1739.77	18.6315	96.0212	98.1587	96.0212
MC	UAE 7007_19	bd	2.15102	0.137903	#N/A	13.7803	#N/A	15.8068	102.717	6.0903	1.18166	0.071805	0.711692	1.62561	1.37943	0.164196	1.18166	0.85663	980.417	28.9932	980.051	21.4514	980.164	17.1974	99.9626	99.9885	99.9885
MC	UAE 7007_20	bd	2.92864	0.130012	#N/A	113.246	#N/A	21.5212	844.123	36.5696	1.06775	0.0497708	0.742205	0.187653	1.30037	0.0273451	1.06775	0.821114	184.303	34.5709	173.911	3.66318	174.625	4.16392	94.3615	99.5912	99.5912
MC	UAE 7007_21	bd	0.447209	0.0185111	#N/A	27.6665	#N/A	3.28633	206.223	57.9667	1.07086	0.0464728	4.10754	0.11054	4.24484	0.0172513	1.07086	0.252274	22.2176	197.187	110.261	2.34097	106.46	8.54435	496.277	103.57	103.57
MC	UAE 7007_22	bd	0.730433	0.0394655	#N/A	6.82303	#N/A	5.36761	50.8581	8.83445	1.16766	0.0608762	2.1312	0.9501	2.43011	0.113193	1.16766	0.480498	634.863	91.7487	691.266	15.2897	678.155	23.7633	108.884	101.933	101.933
MC	UAE 7007_23	bd	4.22501	0.234864	#N/A	55.6186	#N/A	31.0476	414.575	12.3053	1.19263	0.0623371	0.46492	0.698481	1.28005	0.0812656	1.19263	0.931709	685.694	19.8474	503.672	11.5462	537.883	10.6342	73.4544	93.6398	93.6398		x
MC	UAE 7007_24	bd	2.26295	0.123696	#N/A	23.2147	#N/A	16.6294	173.04	9.60667	1.14117	0.061315	0.791282	0.880025	1.38867	0.104094	1.14117	0.821774	650.303	33.9777	638.358	13.8565	640.996	13.1154	98.1633	99.5885	99.5885
MC	UAE 7007_25	bd	2.99327	0.309664	#N/A	19.2091	#N/A	21.9962	143.183	6.00738	1.69015	0.115985	0.360932	2.66205	1.72826	0.166462	1.69015	0.97795	1895.23	12.9823	992.588	31.0222	1317.99	25.1977	52.3729	75.3107	75.3107	x	x
MC	UAE 7007_26	bd	2.59064	0.140254	#N/A	28.2703	#N/A	19.0374	210.724	10.0858	1.47593	0.0607604	0.721624	0.830639	1.6429	0.0991494	1.47593	0.89837	630.764	31.0873	609.422	17.1423	613.967	15.0267	96.6164	99.2598	99.2598
MC	UAE 7007_27	bd	3.09842	0.199517	#N/A	20.4371	#N/A	22.7689	152.336	6.06544	1.0719	0.0721417	0.519629	1.63993	1.19122	0.164869	1.0719	0.899841	989.941	21.1381	983.776	19.5302	985.686	14.9173	99.3772	99.8062	99.8062
MC	UAE 7007_28	bd	17.6398	2.2668	#N/A	46.3903	#N/A	129.627	345.788	2.4849	1.10446	0.144023	0.101586	7.99141	1.10912	0.402431	1.10446	0.995797	2276.13	3.49989	2180.22	40.7318	2230.06	19.8238	95.7863	97.7655	95.7863
MC	UAE 7007_29	bd	1.11316	0.062394	#N/A	10.5533	#N/A	8.1801	78.6632	8.84537	1.10869	0.0626466	1.42627	0.976524	1.8065	0.113054	1.10869	0.613722	696.255	60.7819	690.457	14.5023	691.821	17.9651	99.1673	99.8029	99.8029
MC	UAE 7007_30	bd	3.11282	0.168127	#N/A	32.0404	#N/A	22.8747	238.826	9.55678	1.04931	0.0605946	0.610798	0.874226	1.21413	0.104638	1.04931	0.864244	624.875	26.3388	641.531	12.8023	637.859	11.4362	102.666	100.576	100.576
MC	UAE 7007_31	429.914	0.584252	0.030357	#N/A	6.56748	#N/A	4.2934	48.9533	10.4018	1.15072	0.0577589	2.80476	0.765617	3.03163	0.0961373	1.15072	0.37957	520.627	123.092	591.732	12.9989	577.246	26.3514	113.658	102.51	102.51
MC	UAE 7007_32	bd	0.399307	0.0165202	#N/A	72.9216	#N/A	2.93432	543.55	169.089	1.13919	0.0465103	4.51608	0.0379258	4.65754	0.00591404	1.13919	0.244591	24.1547	216.72	38.012	0.863455	37.7969	3.45022	157.369	100.569	100.569
MC	UAE 7007_33	bd	1.00879	0.0525661	#N/A	11.7004	#N/A	7.41313	87.2135	10.7422	1.05142	0.058012	1.63622	0.744608	1.94492	0.0930912	1.05142	0.5406	530.215	71.6915	573.793	11.5343	565.091	16.719	108.219	101.54	101.54
MC	UAE 7007_34	bd	1.35385	0.0585053	#N/A	71.1498	#N/A	9.94882	530.343	48.0476	1.33451	0.048377	1.49976	0.138825	2.00754	0.0208127	1.33451	0.664749	117.746	70.72	132.79	3.50698	131.997	4.95763	112.776	100.601	100.601
MC	UAE 7007_35	bd	3.81587	0.208902	#N/A	38.2085	#N/A	28.0411	284.802	9.37825	1.41836	0.0613707	0.504062	0.902279	1.50526	0.10663	1.41836	0.942266	652.253	21.6375	653.145	17.5961	652.945	14.3965	100.137	100.031	100.031
MC	UAE 7007_36	bd	1.46419	0.0887352	#N/A	12.7234	#N/A	10.7597	94.8389	7.8306	1.35296	0.0671998	1.08181	1.18324	1.73229	0.127704	1.35296	0.781026	843.973	45.0178	774.755	19.7233	792.823	18.8889	91.7985	97.721	97.721
MC	UAE 7007_37	bd	2.61071	0.146478	#N/A	26.9803	#N/A	19.1849	201.108	9.39871	1.13935	0.0624304	0.695406	0.915859	1.33481	0.106398	1.13935	0.85357	688.884	29.6713	651.792	14.1108	660.168	12.8762	94.6157	98.7313	98.7313
MC	UAE 7007_38	bd	0.843674	0.0452157	#N/A	9.58665	#N/A	6.19977	71.4579	10.3196	1.2631	0.0599414	1.87523	0.800875	2.26095	0.0969028	1.2631	0.55866	601.46	81.1806	596.233	14.3705	597.322	20.2163	99.1308	99.8176	99.8176
MC	UAE 7007_39	357.86	3.40698	0.179505	#N/A	42.114	#N/A	25.0363	313.913	11.2703	1.37366	0.0590302	0.588132	0.722173	1.49427	0.0887291	1.37366	0.919286	568.21	25.6037	548.016	14.4175	551.949	12.6458	96.446	99.2875	99.2875
MC	UAE 7007_40	bd	3.06764	0.141435	#N/A	87.5216	#N/A	22.5427	652.377	26.1259	1.28315	0.0517374	0.700283	0.273046	1.4618	0.0382762	1.28315	0.877785	273.823	32.0922	242.139	6.09586	245.126	6.34718	88.429	98.7816	98.7816
MC	UAE_7007_41	bd	1.23703	0.067738	#N/A	11.9427	#N/A	9.09036	89.0196	8.78169	1.16073	0.0613314	1.32228	0.962956	1.75946	0.113873	1.16073	0.659708	650.878	56.7733	695.204	15.281	684.827	17.3786	106.81	101.515	101.515
MC	UAE_7007_42	bd	3.51578	0.232437	#N/A	21.8088	#N/A	25.8358	162.56	5.64801	1.06846	0.0741504	0.458742	1.81017	1.16277	0.177054	1.06846	0.918886	1045.56	18.5044	1050.86	20.6879	1049.14	15.0976	100.506	100.164	100.506
MC	UAE_7007_43	bd	2.20363	0.119587	#N/A	24.445	#N/A	16.1935	182.21	10.0243	1.18835	0.0608442	0.801225	0.836883	1.43322	0.0997573	1.18835	0.829143	633.729	34.4995	612.986	13.8826	617.424	13.1746	96.7268	99.2812	99.2812
MC	UAE_7007_44	bd	8.0093	0.450436	#N/A	79.7535	#N/A	58.8566	594.474	8.95465	1.31659	0.0630588	0.271822	0.970953	1.34436	0.111674	1.31659	0.979345	710.214	11.5576	682.462	17.0294	688.955	13.361	96.0925	99.0575	99.0575
MC	UAE_7007_45	383.08	7.5965	0.455875	#N/A	92.7791	#N/A	55.8232	691.565	10.9744	2.91116	0.0679954	0.759392	0.854279	3.00858	0.0911212	2.91116	0.967621	868.413	31.4792	562.165	31.2685	626.995	27.7648	64.7347	89.6601	89.6601	x	x
MC	UAE_7007_46	bd	1.5406	0.0882705	#N/A	16.7916	#N/A	11.3212	125.163	9.85683	1.15461	0.064098	1.06718	0.89662	1.57226	0.101453	1.15461	0.734365	744.866	45.12	622.916	13.6969	649.92	14.9832	83.6279	95.845	95.845
MC	UAE_7007_47	bd	0.521917	0.0312252	#N/A	4.10727	#N/A	3.83533	30.6151	7.16398	1.08531	0.0675879	2.60068	1.30082	2.81806	0.139587	1.08531	0.385128	855.944	108.019	842.328	17.1169	846.082	31.8504	98.4092	99.5562	99.5562
MC	UAE_7007_48	bd	4.15703	0.275429	#N/A	29.8994	#N/A	30.5481	222.867	6.38634	1.1642	0.073896	0.394312	1.5954	1.22917	0.156584	1.1642	0.947148	1038.63	15.9221	937.766	20.2892	968.413	15.2292	90.2888	96.8354	96.8354
MC	UAE_7007_49	bd	15.5576	2.43096	#N/A	34.2941	#N/A	114.326	255.625	1.97387	1.12924	0.175239	0.0967874	12.2409	1.13338	0.506618	1.12924	0.996347	2608.32	3.22404	2642.18	48.7718	2623.05	21.0582	101.298	100.729	101.298
MC	UAE_7007_50	bd	2.34774	0.13023	#N/A	27.8142	#N/A	17.2525	207.324	10.6237	1.42529	0.0620006	0.820952	0.804677	1.64482	0.0941292	1.42529	0.866536	674.131	35.1132	579.912	15.7898	599.464	14.7854	86.0236	96.7384	96.7384
MC	UAE_7007_51	bd	1.06207	0.0594325	#N/A	11.7075	#N/A	7.80466	87.2664	9.96115	1.10264	0.0614696	1.53792	0.850848	1.89236	0.10039	1.10264	0.582682	655.706	65.9794	616.694	12.9566	625.114	17.5143	94.0503	98.653	98.653
MC	UAE_7007_52	bd	2.44692	0.154522	#N/A	16.3484	#N/A	17.9813	121.859	6.03404	1.1266	0.0708858	0.653073	1.61976	1.30221	0.165726	1.1266	0.86515	954.121	26.7129	988.521	20.6167	977.9	16.2202	103.605	101.086	101.086
MC	UAE_7007_53	bd	2.61184	0.143249	#N/A	26.3926	#N/A	19.1932	196.728	9.22966	1.02274	0.0614739	0.693586	0.918346	1.23574	0.108346	1.02274	0.827632	655.856	29.7553	663.137	12.8771	661.485	11.9429	101.11	100.25	100.25
MC	UAE_7007_54	bd	1.38884	0.0757255	#N/A	15.4989	#N/A	10.2059	115.527	9.96913	1.11721	0.0607917	1.21389	0.840791	1.64975	0.10031	1.11721	0.677199	631.872	52.2842	616.223	13.118	619.582	15.1883	97.5234	99.4579	99.4579
MC	UAE_7007_55	bd	2.34887	0.126798	#N/A	24.9356	#N/A	17.2608	185.867	9.58369	1.05335	0.0605654	0.776442	0.871351	1.30859	0.104344	1.05335	0.804949	623.836	33.4875	639.816	12.8189	636.301	12.2989	102.561	100.552	100.552
MC	UAE_7007_56	bd	2.437	0.154528	#N/A	22.1872	#N/A	17.9084	165.381	8.28184	1.6442	0.0710398	0.722095	1.1827	1.79578	0.120746	1.6442	0.915593	958.558	29.5159	734.857	22.7982	792.572	19.5705	76.6627	92.718	92.718		x
MC	UAE_7007_57	bd	1.17567	0.0617939	#N/A	14.5657	#N/A	8.63945	108.571	11.3008	1.10352	0.0593095	1.44233	0.723632	1.81606	0.0884896	1.10352	0.607643	578.477	62.6817	546.598	11.5559	552.809	15.3664	94.4893	98.8765	98.8765
MC	UAE_7007_58	bd	2.31824	0.125883	#N/A	24.9986	#N/A	17.0357	186.337	9.83599	1.04991	0.0608101	0.780708	0.852431	1.30836	0.101667	1.04991	0.802461	632.524	33.6228	624.173	12.4799	625.982	12.1536	98.6797	99.711	99.711
MC	UAE_7007_59	bd	0.791031	0.0491571	#N/A	5.85545	#N/A	5.81292	43.6459	6.75779	1.22479	0.0695643	1.77192	1.41933	2.15402	0.147977	1.22479	0.568605	915.519	72.9121	889.615	20.3229	897.08	25.3435	97.1706	99.1678	99.1678
MC	UAE_7007_60	bd	1.55557	0.0922912	#N/A	13.6337	#N/A	11.4312	101.624	8.07544	1.138	0.066204	1.11455	1.13037	1.59288	0.123832	1.138	0.714428	812.832	46.6105	752.583	16.1465	767.928	17.0201	92.5877	98.0018	98.0018
MC	UAE_7007_61	bd	11.2958	0.620181	#N/A	117.545	#N/A	83.0076	876.168	9.41672	1.03709	0.061579	0.215014	0.901642	1.05915	0.106194	1.03709	0.979177	659.519	9.21863	650.607	12.8234	652.605	10.1473	98.6487	99.6939	99.6939
MC	UAE_7007_62	bd	1.98229	0.107156	#N/A	21.6024	#N/A	14.5669	161.022	9.82059	1.07312	0.0607352	0.886225	0.852715	1.39176	0.101827	1.07312	0.771056	629.868	38.184	625.106	12.7737	626.138	12.9256	99.244	99.8352	99.8352
MC	UAE_7007_63	bd	0.171618	0.00729088	#N/A	75.0552	#N/A	1.26114	559.453	397.867	1.23247	0.0477571	9.34905	0.0165501	9.42993	0.0025134	1.23247	0.130697	87.2509	443.357	16.1821	0.398366	16.6671	3.11297	18.5466	97.0898	97.0898
MC	UAE_7007_64	bd	1.89476	0.122501	#N/A	13.1071	#N/A	13.9237	97.6989	6.30595	1.05375	0.0721685	0.795657	1.57797	1.3204	0.15858	1.05375	0.798054	990.696	32.3629	948.882	18.5688	961.569	16.2817	95.7794	98.6806	98.6806
MC	UAE_7007_65	bd	5.18005	0.299388	#N/A	45.0038	#N/A	38.0658	335.453	7.91239	1.15257	0.0648677	0.379847	1.13037	1.21355	0.126384	1.15257	0.949751	770.047	15.9945	767.204	16.6517	767.931	12.9928	99.6308	99.9053	99.9053
MC	UAE_7007_66	bd	12.5212	1.82457	#N/A	28.8063	#N/A	92.0125	214.719	2.13552	1.12063	0.163304	0.141259	10.5437	1.1295	0.46827	1.12063	0.992149	2490.16	4.76026	2475.97	45.9148	2483.77	20.7372	99.4302	99.6859	99.4302
MC	UAE_7007_67	bd	1.41854	0.0773724	#N/A	14.9068	#N/A	10.4242	111.114	9.55659	1.14455	0.0610972	1.16914	0.881494	1.63612	0.10464	1.14455	0.699552	642.658	50.2668	641.543	13.9634	641.789	15.4484	99.8265	99.9616	99.9616
MC	UAE_7007_68	bd	3.17445	0.169263	#N/A	34.4104	#N/A	23.3276	256.491	9.83718	1.10424	0.0601757	0.602763	0.843436	1.25804	0.101655	1.10424	0.877745	609.9	26.0574	624.101	13.1236	621.04	11.6223	102.329	100.493	100.493
MC	UAE_7007_69	369.549	9.36315	0.604926	#N/A	116.474	#N/A	68.8054	868.185	11.3812	1.05176	0.07253	0.227163	0.878681	1.07601	0.0878643	1.05176	0.977461	1000.85	9.2254	542.894	10.9429	640.27	10.169	54.2432	84.7914	84.7914	x	x
MC	UAE_7007_70	bd	2.61423	0.140365	#N/A	28.6105	#N/A	19.2108	213.26	9.85977	1.1095	0.0602944	0.716288	0.843163	1.32063	0.101422	1.1095	0.840131	614.156	30.9431	622.738	13.1587	620.889	12.1949	101.397	100.298	100.298
MC	UAE_7007_71	bd	1.81875	0.0947547	#N/A	25.0087	#N/A	13.3652	186.412	12.5886	1.17304	0.0577998	0.997802	0.633068	1.54001	0.0794371	1.17304	0.76171	522.18	43.7789	492.762	11.1202	498.005	12.0518	94.3662	98.9471	98.9471
MC	UAE_7007_72	bd	3.01055	0.209651	#N/A	23.7545	#N/A	22.1231	177.063	7.29192	2.13119	0.0767368	1.63448	1.45098	2.68579	0.137138	2.13119	0.793504	1114.36	65.2563	828.459	33.0522	910.281	31.7862	74.3441	91.0113	91.0113		x
MC	UAE_7007_73	bd	0.368828	0.0162874	#N/A	15.9947	#N/A	2.71035	119.223	39.8172	1.14203	0.049307	4.60979	0.170742	4.74915	0.0251148	1.14203	0.240471	162.456	215.581	159.901	3.6063	160.063	13.969	98.427	99.899	99.899
MC	UAE_7007_74	bd	1.72181	0.111012	#N/A	11.492	#N/A	12.6528	85.6601	6.20146	1.05357	0.072541	0.869709	1.61284	1.36616	0.161252	1.05357	0.771188	1001.16	35.3185	963.733	18.8346	975.211	16.9826	96.2619	98.823	98.823
MC	UAE_7007_75	bd	4.3534	0.230879	#N/A	50.3315	#N/A	31.9911	375.166	10.7684	1.16832	0.0594417	0.460022	0.761096	1.25562	0.0928639	1.16832	0.93047	583.312	19.9756	572.453	12.7868	574.642	10.9605	98.1383	99.6189	99.6189
MC	UAE_7007_76	bd	1.31253	0.0584707	#N/A	52.5607	#N/A	9.64517	391.782	37.0242	1.31799	0.0498015	1.49871	0.185464	1.9958	0.0270094	1.31799	0.660381	185.741	69.7893	171.804	4.46735	172.751	6.32113	92.4962	99.4516	99.4516
MC	UAE_7007_77	bd	11.9225	1.35389	#N/A	34.0506	#N/A	87.6129	253.809	2.67132	1.26085	0.126439	0.137705	6.52618	1.26835	0.374347	1.26085	0.994089	2049.05	4.86479	2049.82	44.127	2049.44	22.0928	100.038	100.019	100.038
MC	UAE_7007_78	bd	3.6763	0.240165	#N/A	23.9646	#N/A	27.0154	178.63	6.0782	1.65398	0.073203	0.447708	1.66056	1.7135	0.164522	1.65398	0.965262	1019.58	18.1304	981.86	30.0567	993.59	21.4893	96.3005	98.8194	98.8194
MC	UAE_7007_80	bd	9.1088	0.753364	#N/A	60.4337	#N/A	66.9363	450.466	6.13826	1.25868	0.0927472	0.179508	2.08332	1.27142	0.162913	1.25868	0.989983	1482.73	6.80362	972.942	22.6938	1143.33	17.2974	65.6182	85.0973	85.0973	x	x
MC	UAE_7007_81	bd	7.92498	0.507642	#N/A	51.5601	#N/A	58.237	384.323	5.99023	1.28484	0.0717748	0.247252	1.65208	1.30842	0.166939	1.28484	0.981983	979.561	10.074	995.221	23.6543	990.346	16.4185	101.599	100.492	100.492
MC	UAE_7007_82	bd	1.83164	0.0916544	#N/A	27.0538	#N/A	13.4599	201.656	13.5769	1.17903	0.0559809	1.03286	0.568512	1.56745	0.0736544	1.17903	0.752193	451.612	45.8702	458.135	10.4197	457.052	11.4723	101.444	100.237	100.237
MC	UAE_7007_83	bd	11.0018	0.569462	#N/A	140.053	#N/A	80.8471	1043.94	11.7194	1.2433	0.0580338	0.223916	0.682776	1.2633	0.0853289	1.2433	0.984166	531.038	9.80956	527.852	12.5902	528.451	10.3562	99.4002	99.8867	99.8867
MC	UAE_7007_84	bd	5.60178	0.310418	#N/A	61.9213	#N/A	41.1649	461.555	10.1209	1.47884	0.0620938	0.488457	0.845922	1.55742	0.0988054	1.47884	0.949544	677.341	20.8809	607.405	17.1219	622.409	14.3913	89.6748	97.5894	97.5894
MC	UAE_7007_85	bd	0.88038	0.0369977	#N/A	76.3468	#N/A	6.4695	569.081	79.0866	1.12772	0.0473866	2.23927	0.082614	2.50721	0.0126444	1.12772	0.449792	68.7521	106.561	80.9998	1.81522	80.5995	3.87794	117.814	100.497	100.497
MC	UAE7013_01	bd	0.92549	0.0496685	#N/A	9.52226	#N/A	5.67578	57.7239	9.51584	1.23174	0.0594133	1.74703	0.860871	2.1376	0.105088	1.23174	0.576229	582.275	75.875	644.157	15.084	630.598	19.886	110.628	102.15	102.15
MC	UAE7013_02	bd	0.937331	0.0493772	#N/A	9.78771	#N/A	5.7484	59.3331	9.50204	1.14602	0.0590964	1.76906	0.857522	2.10783	0.105241	1.14602	0.543696	570.65	76.9824	645.047	14.0537	628.769	19.571	113.037	102.589	102.589
MC	UAE7013_03	bd	1.07471	0.0549194	#N/A	13.5061	#N/A	6.59091	81.8739	11.366	1.32372	0.0567396	1.61298	0.688304	2.08661	0.0879818	1.32372	0.634388	481.425	71.2662	543.59	13.7865	531.781	17.1302	112.913	102.221	102.221
MC	UAE7013_04	bd	1.47596	0.0887673	#N/A	11.2526	#N/A	9.05167	68.2132	6.92173	1.24338	0.0665412	1.08278	1.32549	1.64876	0.144473	1.24338	0.754132	823.448	45.2051	869.904	20.2047	856.915	18.9073	105.642	101.516	101.516
MC	UAE7013_05	bd	10.932	1.17015	#N/A	42.375	#N/A	67.043	256.877	3.47854	1.05484	0.118717	0.151154	4.70564	1.06562	0.287477	1.05484	0.989889	1937.01	5.4099	1628.91	30.2956	1768.24	17.6924	84.0942	92.1202	84.0942	x	x
MC	UAE7013_06	bd	1.02131	0.0570896	#N/A	10.1071	#N/A	6.26342	61.2692	9.0502	1.53313	0.0632618	1.56795	0.963796	2.19294	0.110495	1.53313	0.699123	717.045	66.593	675.621	19.6377	685.261	21.6243	94.223	98.5932	98.5932
MC	UAE7013_07	bd	2.41572	0.141454	#N/A	20.8001	#N/A	14.815	126.09	7.80261	1.16027	0.0655448	0.706083	1.15824	1.35823	0.128162	1.16027	0.854254	791.872	29.6275	777.373	16.9717	781.129	14.6956	98.169	99.5192	99.5192
MC	UAE7013_08	bd	3.14156	0.172413	#N/A	34.1354	#N/A	19.2663	206.929	10.0683	1.22139	0.0609886	0.588408	0.835207	1.35573	0.0993217	1.22139	0.900906	638.834	25.3144	610.432	14.2116	616.497	12.4531	95.5542	99.0162	99.0162
MC	UAE7013_09	319.835	3.87922	0.215753	#N/A	43.614	#N/A	23.7902	264.388	9.96592	1.87319	0.0610845	0.490042	0.845113	1.93623	0.100342	1.87319	0.967443	642.21	21.0707	616.413	21.986	621.963	17.852	95.9831	99.1076	99.1076
MC	UAE7013_10	484.768	2.0175	0.109346	#N/A	22.8802	#N/A	12.3728	138.7	10.3848	1.34217	0.0602588	0.885509	0.800063	1.60796	0.0962947	1.34217	0.834702	612.882	38.2614	592.658	15.1817	596.864	14.4108	96.7002	99.2952	99.2952
MC	UAE7013_11	397.525	1.63606	0.0890068	#N/A	18.3204	#N/A	10.0335	111.058	10.2097	1.20936	0.0602489	1.06609	0.813651	1.61217	0.0979463	1.20936	0.750144	612.525	46.0668	602.362	13.8945	604.5	14.5826	98.3408	99.6463	99.6463
MC	UAE7013_12	bd	2.07613	0.114025	#N/A	22.2008	#N/A	12.7323	134.581	9.73292	1.34288	0.0608076	0.837661	0.861421	1.58272	0.102744	1.34288	0.848463	632.434	36.0761	630.47	16.111	630.898	14.7663	99.6895	99.9321	99.9321
MC	UAE7013_13	bd	3.3822	0.255026	#N/A	39.2249	#N/A	20.7421	237.781	10.5471	1.3665	0.0829849	1.85128	1.08485	2.30099	0.094813	1.3665	0.593876	1268.86	72.2726	583.939	15.2396	745.997	24.0282	46.0207	78.2763	78.2763	x	x
MC	UAE7013_14	bd	1.74927	0.10331	#N/A	14.9589	#N/A	10.7278	90.6808	7.70047	1.34913	0.0654494	1.03676	1.1719	1.70148	0.129862	1.34913	0.792919	788.815	43.524	787.079	19.9613	787.532	18.4748	99.7799	99.9425	99.9425
MC	UAE7013_15	bd	1.6933	0.101649	#N/A	14.1754	#N/A	10.3846	85.9312	7.58602	1.15524	0.0668245	1.01341	1.21457	1.53674	0.131821	1.15524	0.751747	832.309	42.2495	798.248	17.3239	807.29	16.9731	95.9077	98.88	98.88
MC	UAE7013_16	bd	3.09489	0.165586	#N/A	35.203	#N/A	18.9801	213.401	10.1574	1.18414	0.0593264	0.625277	0.805317	1.33909	0.0984505	1.18414	0.884288	579.093	27.1708	605.322	13.6687	599.823	12.0587	104.529	100.917	100.917
MC	UAE7013_17	bd	2.4851	0.133387	#N/A	28.1382	#N/A	15.2404	170.574	10.1357	1.18903	0.0594304	0.741798	0.808457	1.40144	0.0986612	1.18903	0.848429	582.9	32.2135	606.558	13.7518	601.588	12.6438	104.059	100.826	100.826
MC	UAE7013_18	bd	3.78094	0.239048	#N/A	27.8403	#N/A	23.1875	168.768	6.58686	1.00398	0.0700309	0.510777	1.46593	1.12644	0.151818	1.00398	0.891285	929.259	20.973	911.143	17.0387	916.453	13.5085	98.0506	99.4207	99.4207
MC	UAE7013_19	bd	23.4856	5.80379	#N/A	44.7281	#N/A	144.031	271.142	1.6922	1.07697	0.274418	0.105134	22.3595	1.08209	0.590946	1.07697	0.995269	3331.45	3.2909	2993.26	51.3702	3199.48	20.819	89.8484	93.5546	89.8484	x	x
MC	UAE7013_20	bd	0.920601	0.0497594	#N/A	9.88202	#N/A	5.6458	59.9048	9.66165	1.11743	0.0600076	1.78517	0.85636	2.10606	0.103502	1.11743	0.53058	603.849	77.251	634.899	13.4987	628.134	19.5407	105.142	101.077	101.077
MC	UAE7013_22	bd	10.7016	1.72822	#N/A	26.1124	#N/A	65.63	158.293	2.16246	1.36806	0.179116	0.115899	11.4206	1.37296	0.462437	1.36806	0.996431	2644.7	3.84721	2450.31	55.5339	2558.11	25.3186	92.6499	95.786	92.6499		x
MC	UAE7013_23	bd	8.65714	0.450285	#N/A	108.411	#N/A	53.0919	657.187	11.0828	1.17451	0.057606	0.275731	0.716667	1.20644	0.0902296	1.17451	0.973532	514.808	12.113	556.895	12.5203	548.698	10.177	108.175	101.494	101.494
MC	UAE7013_24	bd	5.55301	0.258492	#N/A	129.555	#N/A	44.9754	1001.28	20.249	1.06963	0.0518676	0.430867	0.353179	1.15315	0.0493852	1.06963	0.927572	279.579	19.7251	310.746	6.48672	307.109	6.0937	111.148	101.184	101.184
MC	UAE7013_25	bd	2.52583	0.135449	#N/A	28.9527	#N/A	20.4574	223.763	10.0383	1.32728	0.0599834	0.742646	0.823894	1.52092	0.0996184	1.32728	0.872682	602.975	32.1418	612.172	15.4841	610.219	13.857	101.525	100.32	100.32
MC	UAE7013_26	bd	3.17391	0.187547	#N/A	28.264	#N/A	25.7064	218.441	7.71202	1.08917	0.0657434	0.555489	1.1754	1.22264	0.129668	1.08917	0.89083	798.217	23.2848	785.969	16.0983	789.168	13.3276	98.4655	99.5947	99.5947
MC	UAE7013_27	bd	2.39551	0.158794	#N/A	15.9802	#N/A	19.4019	123.504	5.80885	1.12456	0.0742964	0.636229	1.76351	1.29206	0.172151	1.12456	0.870361	1049.53	25.6484	1023.95	21.2589	1032.14	16.6075	97.5631	99.2068	97.5631
MC	UAE7013_28	bd	2.47375	0.136471	#N/A	27.8654	#N/A	20.0356	215.36	9.89628	1.12101	0.0617826	0.747163	0.860786	1.34719	0.101048	1.12101	0.832111	666.591	31.9969	620.548	13.2505	630.552	12.5775	93.0928	98.4135	98.4135
MC	UAE7013_29	bd	1.64623	0.0988394	#N/A	14.1409	#N/A	13.3333	109.289	7.49316	1.09651	0.0670366	0.966082	1.23353	1.46138	0.133455	1.09651	0.750321	838.912	40.2342	807.546	16.6238	815.943	16.2592	96.2611	98.9708	98.9708
MC	UAE7013_30	bd	2.75033	0.148669	#N/A	32.4148	#N/A	22.2757	250.52	10.3858	1.06585	0.0603344	0.703016	0.800985	1.27682	0.096285	1.06585	0.834769	615.587	30.3624	592.601	12.0579	597.384	11.467	96.2659	99.1992	99.1992
MC	UAE7013_31	bd	1.79618	0.104629	#N/A	16.0823	#N/A	14.5478	124.293	7.44726	1.19488	0.06495	0.920987	1.2025	1.50863	0.134278	1.19488	0.792032	772.719	38.7641	812.222	18.2115	801.738	16.5905	105.112	101.308	101.308
MC	UAE7013_34	bd	1.14517	0.0614972	#N/A	12.8622	#N/A	9.27506	99.4065	9.51112	1.4219	0.0599949	1.46468	0.869729	2.04134	0.10514	1.4219	0.696551	603.391	63.3869	644.461	17.4173	635.42	19.1024	106.807	101.423	101.423
MC	UAE7013_35	bd	2.08577	0.114683	#N/A	21.9586	#N/A	16.8933	169.709	9.04384	1.66358	0.0616136	0.88517	0.939345	1.88442	0.110573	1.66358	0.882809	660.725	37.9438	676.072	21.3194	672.539	18.3685	102.323	100.525	100.525
MC	UAE7013_36	bd	5.54091	0.322011	#N/A	51.5081	#N/A	44.8774	398.084	7.779	1.11789	0.0651617	0.381803	1.15497	1.18129	0.128551	1.11789	0.946328	779.561	16.0523	779.595	16.3965	779.586	12.7765	100.004	100.001	100.001
MC	UAE7013_37	bd	7.92601	0.493124	#N/A	68.8907	#N/A	64.195	532.427	7.28031	1.14462	0.0692782	0.27412	1.31204	1.17699	0.137357	1.14462	0.972501	907.036	11.2946	829.698	17.7977	851.025	13.4741	91.4736	97.494	97.494
MC	UAE7013_38	bd	0.427314	0.0244708	#N/A	3.9754	#N/A	3.46094	30.7242	7.76708	1.19909	0.0646719	3.24003	1.14805	3.4548	0.128749	1.19909	0.34708	763.681	136.571	780.722	17.6097	776.32	36.8213	102.232	100.567	100.567
MC	UAE7013_39	bd	0.972065	0.0520856	#N/A	11.5822	#N/A	7.87303	89.514	10.0413	1.18044	0.0597545	1.6671	0.820506	2.04271	0.0995887	1.18044	0.577879	594.697	72.2525	611.998	13.7692	608.331	18.5263	102.909	100.603	100.603
MC	UAE7013_40	bd	0.875079	0.046662	#N/A	10.1906	#N/A	7.08752	78.7589	9.75065	1.23923	0.0599355	1.91785	0.847523	2.28338	0.102557	1.23923	0.542716	601.246	83.0288	629.378	14.8445	623.289	21.0519	104.679	100.977	100.977
MC	UAE7013_41	bd	1.40429	0.0875501	#N/A	10.9262	#N/A	11.3737	84.444	6.4989	1.46554	0.0695646	1.17785	1.47588	1.8802	0.153872	1.46554	0.779462	915.529	48.4669	922.633	25.1479	920.541	22.5093	100.776	100.227	100.227
MC	UAE7013_42	bd	1.61902	0.0875564	#N/A	17.8149	#N/A	13.1129	137.684	9.22819	1.14934	0.0609821	1.07895	0.911144	1.57642	0.108364	1.14934	0.729081	638.603	46.4201	663.237	14.4714	657.666	15.149	103.857	100.847	100.847
MC	UAE7013_43	bd	1.00989	0.0738612	#N/A	11.6823	#N/A	8.17939	90.2876	9.6658	1.21113	0.0817747	2.50437	1.16649	2.78185	0.103458	1.21113	0.435369	1240.13	98.1708	634.64	14.6236	785.003	29.9705	51.1754	80.8455	80.8455	x	x
MC	UAE7013_44	bd	8.19931	0.568471	#N/A	158.246	#N/A	66.4086	1223.02	16.6099	1.47162	0.0773121	0.470146	0.641773	1.5449	0.060205	1.47162	0.952569	1129.25	18.7292	376.872	10.7653	503.403	12.1904	33.3736	74.8648	74.8648	x	x
MC	UAE7013_45	bd	0.366964	0.0154033	#N/A	75.1479	#N/A	2.97215	580.787	176.189	1.39132	0.0462392	4.95204	0.0361853	5.14378	0.00567572	1.39132	0.270487	10.1085	238.274	36.4846	1.01229	36.0928	3.64131	360.928	101.086	101.086
MC	UAE7013_46	bd	1.77856	0.118806	#N/A	12.964	#N/A	14.4051	100.193	6.26099	1.22135	0.0751275	1.39907	1.65446	1.85717	0.159719	1.22135	0.657637	1071.91	56.2118	955.215	21.6502	991.26	23.2388	89.1131	96.3638	96.3638
MC	UAE7013_47	bd	0.814634	0.047628	#N/A	7.43458	#N/A	6.59796	57.4587	7.89767	1.29689	0.0652856	1.8486	1.13978	2.25815	0.12662	1.29689	0.574315	783.554	77.6715	768.552	18.7647	772.403	24.1375	98.0854	99.5014	99.5014
MC	UAE7013_48	bd	0.754597	0.0399239	#N/A	8.77985	#N/A	6.1117	67.8558	9.92634	1.08788	0.0593392	2.18581	0.82424	2.44157	0.100742	1.08788	0.445567	579.564	94.975	618.756	12.824	610.411	22.1592	106.762	101.367	101.367
MC	UAE7013_49	bd	1.08622	0.0475346	#N/A	49.679	#N/A	8.79761	383.948	39.0876	1.0199	0.0490301	1.79641	0.172952	2.06575	0.0255835	1.0199	0.493722	149.269	84.2153	162.848	3.27934	161.977	6.16682	109.097	100.537	100.537
MC	UAE7013_50	bd	0.868027	0.0471678	#N/A	9.16856	#N/A	7.0304	70.8599	9.00073	1.03779	0.0609137	1.85085	0.933123	2.12194	0.111102	1.03779	0.489073	636.189	79.6621	679.146	13.3652	669.276	20.5903	106.752	101.475	101.475
MC	UAE7013_51	bd	1.9974	0.0869618	#N/A	207.46	#N/A	16.1775	1603.37	87.8581	1.01915	0.0487901	1.05839	0.0765686	1.4693	0.011382	1.01915	0.693629	137.754	49.7226	72.9586	1.47856	74.9137	2.11996	52.9629	97.3902	97.3902
MC	UAE7013_52	bd	2.20681	0.120839	#N/A	23.2295	#N/A	17.8736	179.531	8.84155	1.36861	0.0613436	0.806386	0.956625	1.58851	0.113102	1.36861	0.861571	651.303	34.6206	690.74	17.9045	681.547	15.6506	106.055	101.349	101.349
MC	UAE7013_53	bd	3.04251	0.161217	#N/A	36.4673	#N/A	24.6422	281.84	10.0053	1.29804	0.0593075	0.687937	0.817302	1.46907	0.0999474	1.29804	0.88358	578.404	29.8971	614.101	15.1888	606.542	13.3292	106.172	101.246	101.246
MC	UAE7013_54	bd	2.68361	0.144235	#N/A	32.741	#N/A	21.7353	253.041	10.0886	1.20012	0.0601724	0.686326	0.822373	1.3825	0.099122	1.20012	0.868073	609.78	29.6704	609.261	13.9388	609.371	12.5911	99.915	99.982	99.982
MC	UAE7013_55	bd	0.91936	0.0499034	#N/A	10.5873	#N/A	7.44616	81.8248	9.61445	1.2506	0.0610061	1.73013	0.874884	2.1348	0.10401	1.2506	0.585818	639.449	74.4259	637.867	15.1726	638.216	20.031	99.7526	99.9454	99.9454
MC	UAE7013_56	bd	0.279048	0.0143337	#N/A	3.60292	#N/A	2.26009	27.8455	10.9095	1.33683	0.0577155	5.27473	0.729437	5.4415	0.0916631	1.33683	0.245673	518.978	231.557	565.365	14.4558	556.223	45.5701	108.938	101.644	101.644
MC	UAE7013_57	bd	0.554816	0.0291153	#N/A	6.37944	#N/A	4.49361	49.304	9.7259	1.13101	0.059722	2.91478	0.846653	3.12652	0.102818	1.13101	0.361747	593.516	126.352	630.904	13.5808	622.81	28.7005	106.299	101.299	101.299
MC	UAE7013_58	bd	0.802677	0.0434237	#N/A	8.92501	#N/A	6.50111	68.9777	9.33374	1.07832	0.0603959	1.96863	0.892181	2.24461	0.107138	1.07832	0.480405	617.788	84.9916	656.106	13.4396	647.54	21.2684	106.203	101.323	101.323
MC	UAE7013_59	bd	1.24415	0.0536017	#N/A	127.749	#N/A	10.0767	987.318	86.9065	1.14365	0.0483403	1.75148	0.0766934	2.0918	0.0115066	1.14365	0.546732	115.957	82.6169	73.7529	1.67712	75.0314	3.02134	63.6038	98.296	98.296
MC	UAE7013_60	bd	1.17288	0.0670896	#N/A	10.7654	#N/A	9.49949	83.2013	7.71895	1.69046	0.0647119	1.4143	1.15592	2.20407	0.129551	1.69046	0.766975	764.984	59.6016	785.305	24.9488	780.035	23.719	102.656	100.676	100.676
MC	UAE7013_61	bd	4.22395	0.275086	#N/A	30.1906	#N/A	34.211	233.33	5.98032	1.20092	0.0729061	0.426944	1.68089	1.27456	0.167215	1.20092	0.942227	1011.34	17.3111	996.749	22.1432	1001.32	16.1002	98.5568	99.5434	99.5434
MC	UAE7013_62	bd	1.89958	0.120217	#N/A	14.284	#N/A	15.3852	110.395	6.35169	1.26847	0.0712884	0.841274	1.5475	1.52209	0.157439	1.26847	0.833374	965.694	34.3497	942.526	22.2072	949.498	18.6051	97.601	99.2658	99.2658
MC	UAE7013_63	bd	1.0371	0.060051	#N/A	9.78572	#N/A	8.39977	75.6297	7.93307	1.12365	0.0648601	1.50672	1.12729	1.87957	0.126055	1.12365	0.597821	769.8	63.4471	765.319	16.1969	766.463	20.028	99.4179	99.8507	99.8507
MC	UAE7013_64	bd	0.750787	0.0448843	#N/A	6.35787	#N/A	6.08084	49.1373	6.90832	1.6279	0.0663404	1.93199	1.32406	2.52639	0.144753	1.6279	0.644359	817.135	80.7403	871.484	26.485	856.288	28.8167	106.651	101.775	101.775
MC	UAE7013_65	bd	1.08439	0.0622052	#N/A	9.6102	#N/A	8.78279	74.2732	7.40927	1.36197	0.0646573	1.43107	1.20322	1.97558	0.134966	1.36197	0.689403	763.204	60.3258	816.134	20.8476	802.069	21.6769	106.935	101.754	101.754
MC	UAE7013_66	bd	0.492902	0.0287863	#N/A	4.30344	#N/A	3.99216	33.2595	7.27508	1.20685	0.0652483	2.80257	1.23661	3.05137	0.137455	1.20685	0.395509	782.352	117.777	830.258	18.7756	817.344	33.6954	106.123	101.58	101.58
MC	UAE7013_67	bd	0.493087	0.0281558	#N/A	4.3381	#N/A	3.99365	33.5274	7.24852	1.11298	0.0638323	2.8647	1.21421	3.07331	0.137959	1.11298	0.362143	736.08	121.291	833.111	17.373	807.122	33.6607	113.182	103.22	103.22
MC	UAE7013_68	bd	3.01041	0.162821	#N/A	33.1587	#N/A	24.3822	256.27	9.21724	1.13898	0.0606814	0.614666	0.907728	1.29426	0.108492	1.13898	0.880029	627.959	26.492	663.986	14.3565	655.849	12.4296	105.737	101.241	101.241
MC	UAE7013_69	bd	2.54073	0.152777	#N/A	29.1932	#N/A	20.5781	225.622	9.48629	1.33846	0.0672992	0.667102	0.978171	1.49549	0.105415	1.33846	0.894995	847.048	27.7469	646.066	16.4353	692.667	14.9074	76.2727	93.2723	93.2723		x
MC	UAE7013_70	bd	2.1108	0.212202	#N/A	7.69785	#N/A	17.096	59.4934	2.97342	1.46204	0.112575	0.509419	5.22021	1.54825	0.336313	1.46204	0.94432	1841.4	18.4424	1868.91	47.2662	1855.92	26.0496	101.494	100.7	101.494
MC	UAE7013_71	bd	1.86592	0.101625	#N/A	21.6867	#N/A	15.1126	167.607	9.64652	1.50572	0.060604	0.93906	0.866228	1.77455	0.103664	1.50572	0.848509	625.21	40.4918	635.848	18.2084	633.517	16.5906	101.701	100.368	100.368
MC	UAE7013_72	bd	4.95506	0.317052	#N/A	62.4154	#N/A	40.1325	482.382	10.4001	1.57631	0.0714389	0.850526	0.947103	1.79113	0.0961527	1.57631	0.880064	969.998	34.7045	591.823	17.8025	676.593	17.5404	61.0128	87.471	87.471	x	x
MC	UAE7013_73	bd	2.03922	0.10919	#N/A	24.7848	#N/A	16.5162	191.551	10.0963	1.39519	0.0601037	0.861088	0.820804	1.63952	0.099046	1.39519	0.850975	607.311	37.2409	608.815	16.1904	608.497	14.8992	100.248	100.052	100.052
MC	UAE7013_74	1615.18	5.13944	0.604148	#N/A	229.478	#N/A	41.6258	1773.54	36.5749	2.66699	0.133085	0.847381	0.501702	2.79838	0.0273411	2.66699	0.95305	2139.06	29.6337	173.886	9.14458	412.854	18.8105	8.12906	42.118	42.118	x	x
MC	UAE7013_75	bd	0.768754	0.0400634	#N/A	9.42753	#N/A	6.22636	72.8614	10.1644	1.24731	0.0584813	2.13546	0.793295	2.47305	0.0983821	1.24731	0.504361	547.84	93.2858	604.921	14.388	593.039	21.9769	110.419	102.003	102.003
MC	UAE7013_76	bd	0.716565	0.0312989	#N/A	23.4988	#N/A	5.80367	181.612	27.3675	1.88	0.0489288	2.65893	0.246508	3.25642	0.0365398	1.88	0.57732	144.422	124.761	231.349	8.53882	223.736	12.9944	160.19	103.403	103.403
MC	UAE7013_77	bd	11.6696	2.08423	#N/A	26.2916	#N/A	94.5155	203.197	1.87081	2.44276	0.200013	0.223912	14.7411	2.453	0.534529	2.44276	0.995825	2826.3	7.30881	2760.5	108.782	2798.68	45.6102	97.672	98.6361	97.672
MC	UAE7013_78	4335.41	7.09041	1.10334	#N/A	64.9142	#N/A	57.4273	501.695	7.70302	2.57477	0.172696	11.0025	3.09117	11.2998	0.129819	2.57477	0.22786	2583.95	367.364	786.834	38.0308	1430.5	160.075	30.4509	55.004	55.004	x	x
MC	UAE7013_79	bd	3.37754	0.265001	#N/A	32.8883	#N/A	27.3557	254.18	7.96911	1.35709	0.0884657	0.840289	1.53062	1.59618	0.125485	1.35709	0.850214	1392.62	32.2409	762.054	19.4784	942.746	19.4188	54.721	80.8335	80.8335	x	x
MC	UAE7013_80	bd	12.0115	1.46996	#N/A	35.7086	#N/A	97.2846	275.977	2.44984	1.37386	0.13721	0.127412	7.72236	1.37975	0.40819	1.37386	0.995727	2192.28	4.4296	2206.64	51.1407	2199.21	24.5089	100.655	100.338	100.655
MC	UAE7013_81	bd	2.69018	0.153646	#N/A	26.0178	#N/A	21.7885	201.081	8.05329	1.18143	0.0640233	0.685895	1.09614	1.3661	0.124173	1.18143	0.864821	742.399	29.0109	754.537	16.8029	751.482	14.4047	101.635	100.406	100.406
SC	UAE 7026_01	bd	0.742048	0.0445922	7.17898	8.03971	0.892941	6.40511	63.7189	10.1336	1.17678	0.060409	0.520253	0.821941	1.28665	0.098682	1.17678	0.914606	618.255	22.4591	606.68	13.6129	609.131	11.7197	98.1278	99.5977	99.5977
SC	UAE 7026_02	bd	0.496789	0.0415121	3.84039	4.9401	0.77739	4.28812	39.1529	9.26183	1.23943	0.0830804	0.627608	1.23681	1.38928	0.10797	1.23943	0.892144	1271.11	24.4935	660.948	15.5533	817.435	15.4813	51.9979	80.8563	80.8563	x	x
SC	UAE 7026_03	bd	5.94967	0.983468	7.83986	13.6202	0.575606	51.3556	107.947	2.10594	2.80628	0.163747	0.655151	10.7209	2.88174	0.474848	2.80628	0.973814	2494.73	22.0678	2504.79	115.45	2499.23	52.1653	100.403	100.222	100.403
SC	UAE 7026_04	bd	2.99279	0.229482	7.78814	18.4116	0.423002	25.8328	145.922	5.68885	1.46326	0.0766924	0.5	1.85878	1.54633	0.175782	1.46326	0.946281	1113.2	19.9658	1043.89	28.143	1066.55	20.2153	93.7738	97.8752	93.7738		x
SC	UAE 7026_05	331.736	3.24309	0.204393	3.28447	32.1768	0.102076	27.9933	255.018	9.26773	1.09182	0.0618989	0.5	0.920896	1.20086	0.107901	1.09182	0.909196	670.617	21.3981	660.548	13.695	662.834	11.6244	98.4985	99.6551	99.6551
SC	UAE 7026_06	bd	0.445319	0.0263629	0.582781	5.53968	0.105201	3.84384	43.9049	11.4673	1.45222	0.0595047	0.59996	0.71547	1.57127	0.0872045	1.45222	0.924232	585.611	26.0421	538.983	15.0004	547.989	13.2217	92.0377	98.3565	98.3565
SC	UAE 7026_07	bd	3.16955	0.235429	7.25215	19.8266	0.365778	27.3585	157.136	5.83746	1.3544	0.0743131	0.5	1.75526	1.44375	0.171307	1.3544	0.938116	1049.98	20.1552	1019.31	25.4884	1029.1	18.5083	97.0788	99.0483	97.0788
SC	UAE 7026_08	bd	2.77256	0.169586	3.90244	28.5173	0.136845	23.9318	226.015	9.48682	1.16216	0.0606086	0.5	0.880876	1.26516	0.105409	1.16216	0.918592	625.371	21.5592	646.033	14.2722	641.456	11.9618	103.304	100.714	100.714
SC	UAE 7026_09	bd	3.10523	0.190549	3.63053	32.8828	0.110408	26.8033	260.614	9.84159	1.13296	0.0601048	0.5	0.842063	1.23838	0.10161	1.13296	0.914868	607.348	21.6242	623.835	13.4591	620.284	11.4316	102.714	100.572	100.572
SC	UAE 7026_10	bd	9.61369	0.661323	27.7645	69.8579	0.397442	82.9822	553.66	6.74697	1.24219	0.0680619	0.5	1.3909	1.33905	0.148215	1.24219	0.92767	870.44	20.72	890.948	20.64	885.08	15.6975	102.356	100.663	100.663
SC	UAE 7026_11	bd	0.650478	0.0405894	2.59088	6.18405	0.418961	5.61471	49.0119	8.86332	1.38971	0.0625691	0.5	0.973341	1.47692	0.112825	1.38971	0.940951	693.619	21.3172	689.131	18.1401	690.184	14.6871	99.353	99.8474	99.8474
SC	UAE 7026_12	bd	7.04854	0.519906	13.8031	43.7531	0.315477	60.8407	346.767	5.71129	1.18823	0.0734252	0.5	1.77261	1.28914	0.175092	1.18823	0.92172	1025.71	20.2292	1040.11	22.7863	1035.48	16.6008	101.403	100.447	101.403
SC	UAE 7026_13	bd	0.70913	0.0352441	24.4178	48.2004	0.506588	6.12098	382.014	63.3816	1.02953	0.0499147	0.5	0.108584	1.14452	0.0157775	1.02953	0.899528	191.022	23.2607	100.914	2.06138	104.669	2.27403	52.8286	96.4121	96.4121
SC	UAE 7026_14	bd	0.355048	0.0217484	2.20811	4.09362	0.539403	3.06466	32.4441	10.6528	1.23781	0.0602536	0.687195	0.779867	1.41578	0.093872	1.23781	0.874301	612.695	29.6935	578.396	13.6808	585.408	12.5201	94.4019	98.8023	98.8023
SC	UAE 7026_15	bd	1.8344	0.096974	10.7862	38.6379	0.279161	15.8339	306.225	19.5733	1.07214	0.0534511	0.5	0.376525	1.183	0.0510899	1.07214	0.90629	347.995	22.6123	321.21	6.71534	324.478	6.55015	92.3031	98.9928	98.9928
SC	UAE 7026_16	bd	3.33519	0.201935	13.9883	34.5947	0.404348	28.7882	274.181	9.69406	1.09608	0.0609223	0.5	0.866507	1.20474	0.103156	1.09608	0.909809	636.493	21.5193	632.877	13.2009	633.669	11.2948	99.432	99.8751	99.8751
SC	UAE 7026_17	bd	1.77701	0.104771	9.57635	19.8172	0.483233	15.3385	157.062	10.3492	1.15983	0.0594664	0.5	0.792255	1.26302	0.0966254	1.15983	0.918303	584.216	21.7083	594.602	13.1624	592.45	11.2751	101.778	100.363	100.363
SC	UAE 7026_18	bd	1.62502	0.113034	6.23471	11.2633	0.553542	14.0267	89.2675	6.48665	1.37492	0.0696605	0.5	1.4807	1.46301	0.154163	1.37492	0.939787	918.362	20.5652	924.256	23.6343	922.517	17.5807	100.642	100.188	100.188
SC	UAE 7026_19	382.982	1.01968	0.167705	7.81697	2.24196	3.48667	8.80156	17.7687	2.01883	5.2074	0.163194	0.829375	11.1457	5.27304	0.495336	5.2074	0.987553	2489.03	27.9522	2593.72	218.648	2535.38	93.7976	104.206	102.301	104.206
SC	UAE 7026_20	367.671	3.49238	0.250026	12.3991	29.2879	0.423352	30.1451	232.122	7.77764	1.18234	0.0710288	0.5	1.25918	1.28371	0.128574	1.18234	0.921029	958.244	20.4387	779.723	17.3431	827.539	14.427	81.37	94.2219	94.2219		x
SC	UAE 7026_21	bd	3.29345	0.190528	20.9993	39.3955	0.533038	28.4279	312.23	11.1439	1.10317	0.0578692	0.5	0.715997	1.21119	0.089735	1.10317	0.910815	524.814	21.9278	553.97	11.7014	548.301	10.2113	105.555	101.034	101.034
SC	UAE 7026_22	bd	2.23884	0.136208	30.0375	26.0295	1.15398	19.325	206.298	10.8044	1.11146	0.0612747	0.5	0.781955	1.21875	0.0925549	1.11146	0.91197	648.89	21.4751	570.63	12.1281	586.598	10.8031	87.9394	97.2778	97.2778
SC	UAE 7026_23	bd	3.88608	0.227015	17.7937	48.4446	0.3673	33.5434	383.949	11.588	1.09654	0.0575536	0.5	0.684802	1.20516	0.0862961	1.09654	0.909874	512.81	21.9728	533.594	11.2212	529.673	9.89921	104.053	100.74	100.74
SC	UAE 7026_24	bd	0.962525	0.056913	7.87917	12.1267	0.649739	8.30819	96.1102	11.6841	1.13764	0.0581919	0.5	0.6867	1.24267	0.085586	1.13764	0.915481	536.996	21.8824	529.379	11.5532	530.816	10.2225	98.5816	99.7294	99.7294
SC	UAE 7026_25	bd	9.51152	1.81459	11.9495	21.5464	0.554596	82.1003	170.766	2.06154	3.07073	0.188235	0.5	12.5896	3.11117	0.485075	3.07073	0.987001	2726.8	16.4697	2549.33	128.036	2649.44	56.9066	93.4917	96.2216	93.4917
SC	UAE 7026_26	bd	0.8598	0.0590226	2.34911	6.58571	0.356698	7.42151	52.1952	7.14155	1.40061	0.0680785	0.573282	1.31437	1.51339	0.140026	1.40061	0.925476	870.946	23.7549	844.807	22.1418	852.048	17.3058	96.9988	99.1502	99.1502
SC	UAE 7026_27	bd	1.96232	0.124184	3.62085	18.2529	0.198371	16.9381	144.664	8.63078	1.20561	0.0623874	0.5	0.996664	1.30518	0.115864	1.20561	0.923712	687.417	21.339	706.716	16.1195	702.115	13.145	102.808	100.655	100.655
SC	UAE 7026_28	bd	1.38821	0.0852075	10.4123	14.6304	0.711689	11.9825	115.953	9.84844	1.1659	0.0610128	0.5	0.854191	1.26859	0.101539	1.1659	0.919052	639.685	21.5079	623.421	13.8413	626.947	11.7993	97.4575	99.4377	99.4377
SC	UAE 7026_29	bd	2.70847	0.202307	7.20831	18.1623	0.396883	23.3786	143.946	6.21376	1.34817	0.0730446	0.5	1.62082	1.43791	0.160933	1.34817	0.937595	1015.19	20.2615	961.96	24.0504	978.309	17.9	94.7565	98.3289	98.3289
SC	UAE 7026_30	bd	2.27201	0.137994	5.79037	24.5709	0.23566	19.6113	194.737	10.0335	1.16525	0.0605272	0.5	0.831766	1.26799	0.0996664	1.16525	0.918971	622.475	21.5696	612.454	13.6018	614.591	11.6257	98.39	99.6522	99.6522
SC	UAE 7026_31	bd	8.45653	0.551583	9.78556	68.1268	0.143637	72.994	539.941	7.587	1.16652	0.0651366	0.5	1.18374	1.26916	0.131804	1.16652	0.919127	778.752	21.0244	798.151	17.4908	793.054	13.8759	102.491	100.643	100.643
SC	UAE 7026_32	bd	1.58308	0.0972849	2.96167	16.4429	0.180119	13.6646	130.318	9.66562	1.17473	0.0611618	0.5	0.872472	1.27671	0.103459	1.17473	0.920122	644.929	21.4892	634.651	14.1848	636.909	12.0093	98.4062	99.6454	99.6454
SC	UAE 7026_33	bd	13.2085	1.69558	12.4409	49.5183	0.251239	114.011	392.459	3.42676	1.6838	0.125885	0.514822	5.06513	1.76074	0.291821	1.6838	0.9563	2041.28	18.2036	1650.62	48.8546	1830.29	29.4305	80.8622	90.1838	80.8622	x	x
SC	UAE 7026_34	bd	1.11399	0.070068	2.01709	11.8352	0.170431	9.61556	93.8	9.73293	1.17596	0.0610401	0.5	0.864715	1.27784	0.102744	1.17596	0.92027	640.647	21.5045	630.47	14.1107	632.693	11.9629	98.4115	99.6486	99.6486
SC	UAE 7026_35	bd	3.53231	0.255608	12.3647	25.1317	0.491995	30.4898	199.182	6.74659	1.4176	0.0724157	0.5	1.47996	1.5032	0.148223	1.4176	0.943059	997.648	20.3156	890.995	23.5504	922.214	18.0557	89.3096	96.6148	96.6148
SC	UAE 7026_36	bd	0.484858	0.0293705	1.99581	5.10264	0.391133	4.18513	40.4411	9.76306	1.31945	0.059539	0.500939	0.840846	1.41135	0.102427	1.31945	0.93489	586.86	21.7394	628.616	15.7861	619.612	13.0079	107.115	101.453	101.453
SC	UAE 7026_37	bd	2.24287	0.133232	11.5711	24.8991	0.464719	19.3597	197.338	10.3693	1.13247	0.0589766	0.5	0.784208	1.23794	0.0964384	1.13247	0.914805	566.233	21.7742	593.503	12.8295	587.881	10.9899	104.816	100.956	100.956
SC	UAE 7026_38	bd	0.348096	0.0208924	2.60215	3.89649	0.66782	3.00465	30.8817	10.5808	1.33037	0.059911	0.668276	0.780707	1.48878	0.0945105	1.33037	0.893595	600.362	28.9357	582.158	14.7938	585.887	13.1694	96.9678	99.3636	99.3636
SC	UAE 7026_39	bd	1.13264	0.0718099	4.5743	13.2552	0.345095	9.77656	105.054	10.861	1.17677	0.0617957	0.5	0.784494	1.27859	0.0920725	1.17677	0.920367	667.047	21.4107	567.783	12.7787	588.044	11.351	85.1189	96.5545	96.5545
SC	UAE 7026_40	bd	1.68659	0.10389	5.69834	17.1134	0.332976	14.5581	135.632	9.38915	1.17827	0.0611579	0.5	0.898106	1.27997	0.106506	1.17827	0.920546	644.793	21.4897	652.424	14.6056	650.715	12.225	101.183	100.263	100.263
SC	UAE 7026_41	494.051	0.434556	0.0207321	42.0126	60.3429	0.696231	3.75094	478.249	131.209	1.02781	0.0471276	0.5	0.0495239	1.14298	0.00762145	1.02781	0.899241	55.6992	23.852	48.9447	1.00223	49.0802	1.09468	87.8734	99.7241	99.7241
SC	UAE 7026_42	bd	4.50506	0.270366	11.1065	52.7579	0.210518	38.8862	418.134	10.9243	1.09759	0.0594056	0.5	0.74978	1.20611	0.0915387	1.09759	0.910024	581.994	21.7164	564.631	11.8564	568.097	10.4415	97.0167	99.39	99.39
SC	UAE 7026_43	bd	2.59426	0.156455	11.2494	29.7948	0.377564	22.3928	236.139	10.6459	1.12953	0.0593267	0.5	0.768368	1.23524	0.0939329	1.12953	0.914415	579.105	21.727	578.755	12.4925	578.826	10.8415	99.9395	99.9877	99.9877
SC	UAE 7026_44	bd	2.64287	0.162577	11.8288	31.798	0.371998	22.8124	252.016	11.2782	1.09647	0.0615247	0.5	0.752159	1.20509	0.0886664	1.09647	0.909864	657.627	21.444	547.645	11.5032	569.476	10.4515	83.2759	96.1665	96.1665
SC	UAE 7026_45	bd	4.21455	0.53284	11.4227	12.7941	0.89281	36.3786	101.4	2.85168	1.87573	0.126971	0.5	6.13909	1.94123	0.35067	1.87573	0.96626	2056.45	17.6489	1937.8	62.483	1995.82	33.3463	94.2302	97.0927	94.2302		x
SC	UAE 7026_46	bd	2.93538	0.216511	7.09003	19.4336	0.364833	25.3372	154.022	6.05884	1.39118	0.0737798	0.5	1.67899	1.4783	0.165048	1.39118	0.941065	1035.45	20.1994	984.77	25.3597	1000.6	18.6427	95.1055	98.4179	98.4179
SC	UAE 7026_47	bd	0.881737	0.0547787	1.61946	9.32539	0.173662	7.61086	73.9086	9.65102	1.22336	0.0610775	0.547377	0.872589	1.34024	0.103616	1.22336	0.912795	641.966	23.5369	635.566	14.7915	636.972	12.604	99.0031	99.7792	99.7792
SC	UAE 7026_48	bd	2.34573	0.157135	4.3152	18.4171	0.234304	20.2475	145.965	7.3618	1.26517	0.0670984	0.5	1.25669	1.36039	0.135836	1.26517	0.930007	840.829	20.8171	821.074	19.4778	826.421	15.2689	97.6506	99.3531	99.3531
SC	UAE 7026_49	bd	2.60847	0.423525	4.10219	6.17404	0.664426	22.5155	48.9325	2.20882	3.29815	0.160749	0.794998	10.0343	3.39261	0.452731	3.29815	0.972157	2463.55	26.8622	2407.38	131.174	2437.95	60.7953	97.72	98.7463	97.72
SC	UAE 7026_50	bd	1.02996	0.0696028	2.95548	8.07747	0.365892	8.8903	64.0182	7.22689	1.47213	0.0671821	0.553307	1.28175	1.57268	0.138372	1.47213	0.936066	843.425	23.027	835.451	23.0294	837.634	17.7839	99.0545	99.7394	99.7394
SC	UAE 7026_51	bd	3.09969	0.193279	4.90215	33.9468	0.144407	26.7555	269.046	10.0722	1.16007	0.0615351	0.5	0.842366	1.26323	0.0992835	1.16007	0.918333	657.99	21.4427	610.208	13.4941	620.451	11.662	92.7382	98.3492	98.3492
SC	UAE 7026_52	bd	2.86285	0.174811	6.7747	28.945	0.234054	24.7112	229.404	9.46853	1.13178	0.0611532	0.5	0.890508	1.23731	0.105613	1.13178	0.914714	644.627	21.4903	647.22	13.9238	646.642	11.7673	100.402	100.089	100.089
SC	UAE 7026_53	bd	1.45085	0.100454	5.8147	14.8075	0.392685	12.5232	117.358	9.56302	1.16521	0.0686269	0.5	0.989465	1.26795	0.104569	1.16521	0.918966	887.547	20.6644	641.132	14.2064	698.447	12.7263	72.2364	91.7939	91.7939		x
SC	UAE 7026_54	bd	0.0939045	0.00457439	4.54753	16.4866	0.275832	0.810553	130.665	165.967	1.02763	0.0477592	1.32406	0.0396769	1.67606	0.00602531	1.02763	0.613125	87.3588	62.7893	38.7251	0.793469	39.5086	1.29811	225.587	98.017	98.017
SC	UAE 7026_55	bd	0.516399	0.0326333	2.06919	5.36703	0.385538	4.45739	42.5365	9.58973	1.3077	0.0614238	0.704002	0.883144	1.48516	0.104278	1.3077	0.880511	654.108	30.2109	639.432	15.9014	642.679	14.0467	97.7564	99.4948	99.4948
SC	UAE 7026_56	bd	2.20885	0.136258	7.82072	24.3084	0.32173	19.0661	192.656	10.142	1.12583	0.0609928	0.5	0.829198	1.23187	0.0986003	1.12583	0.913923	638.982	21.5104	606.201	13.0143	613.167	11.2774	94.8698	98.8639	98.8639
SC	UAE 7026_57	bd	1.36978	0.0836632	3.8088	13.7869	0.276263	11.8235	109.268	9.44459	1.2297	0.0608548	0.5	0.88841	1.32747	0.105881	1.2297	0.926353	634.107	21.5279	648.781	15.1617	645.515	12.6038	102.314	100.506	100.506
SC	UAE 7026_58	bd	0.934542	0.0595224	3.47885	8.70466	0.399654	8.06666	68.989	8.6187	1.37706	0.0636195	0.5	1.01777	1.46502	0.116027	1.37706	0.939957	729.004	21.1943	707.654	18.4316	712.791	14.8967	97.0713	99.2792	99.2792
SC	UAE 7026_59	bd	3.68172	0.264501	22.969	24.695	0.930108	31.7794	195.721	6.21463	1.27456	0.0704115	0.5	1.56217	1.36913	0.160911	1.27456	0.930931	940.377	20.4951	961.836	22.7368	955.33	16.8122	102.282	100.681	100.681
SC	UAE 7026_60	bd	17.2099	2.22551	6.36276	50.7214	0.125445	148.55	401.993	2.73478	1.83243	0.127456	0.5	6.42596	1.89942	0.36566	1.83243	0.964731	2063.18	17.6354	2008.94	62.9487	2035.83	32.8415	97.3715	98.6796	97.3715
SC	UAE 7026_61	bd	2.32508	0.183228	4.73461	24.0724	0.196683	20.0693	190.786	9.57233	1.18798	0.0782478	0.519935	1.12708	1.29678	0.104468	1.18798	0.916103	1153.17	20.6399	640.539	14.4711	766.362	13.8589	55.5458	83.5818	83.5818	x	x
SC	UAE 7026_62	bd	0.784811	0.0488694	1.45677	6.90397	0.211004	6.77422	54.7176	8.07175	1.48287	0.0616524	0.5	1.05313	1.5649	0.123889	1.48287	0.947583	662.072	21.4283	752.908	21.0403	730.433	16.1714	113.72	103.077	103.077
SC	UAE 7026_63	bd	3.80443	0.268282	40.5794	44.7278	0.907252	32.8386	354.491	10.9564	1.20771	0.0711141	0.5	0.89493	1.30712	0.0912709	1.20771	0.923947	960.694	20.431	563.049	13.0098	649.014	12.4596	58.6086	86.7545	86.7545	x	x
SC	UAE 7026_64	bd	0.311238	0.0223434	2.05881	1.95803	1.05147	2.6865	15.5184	5.8319	2.57049	0.0723791	0.928499	1.71122	2.73304	0.171471	2.57049	0.940523	996.62	37.732	1020.21	48.3275	1012.74	34.4398	102.367	100.738	102.367
SC	UAE 7026_65	bd	4.47316	0.285443	20.1866	45.0342	0.44825	38.6108	356.92	9.34774	1.15014	0.0638369	0.5	0.9416	1.25412	0.106978	1.15014	0.917088	736.23	21.1694	655.172	14.3143	673.719	12.2766	88.9901	97.2471	97.2471
SC	UAE 7026_66	bd	4.7481	0.900777	4.31156	9.89238	0.435847	40.984	78.4023	1.91113	3.66903	0.187736	1.00258	13.5443	3.80354	0.52325	3.66903	0.964635	2722.43	33.0378	2712.95	160.48	2718.38	69.4968	99.6518	99.8	99.6518
SC	UAE 7026_67	bd	8.19624	0.637066	13.5278	47.8661	0.282617	70.7472	379.364	5.41455	1.68788	0.0763795	0.5	1.94498	1.76038	0.184688	1.68788	0.958815	1105.03	19.99	1092.53	33.8363	1096.72	23.3398	98.8686	99.6183	98.8686
SC	UAE 7026_68	bd	2.29113	0.141966	7.94614	24.1637	0.328847	19.7763	191.51	9.63292	1.18016	0.0616794	0.5	0.882843	1.28171	0.103811	1.18016	0.920771	663.011	21.4249	636.702	14.294	642.517	12.1317	96.0319	99.095	99.095
SC	UAE 7026_69	bd	2.53527	0.183454	7.17056	17.3529	0.41322	21.8836	137.531	6.3035	1.28842	0.071692	0.5	1.56816	1.38204	0.158642	1.28842	0.932262	977.21	20.3792	949.226	22.7044	957.699	16.9945	97.1364	99.1153	99.1153
SC	UAE 7026_70	bd	1.56387	0.0976505	2.41701	16.9199	0.14285	13.4988	134.099	10.0825	1.19934	0.0611347	0.5	0.83603	1.29939	0.099182	1.19934	0.923001	643.977	21.4926	609.613	13.9374	616.953	11.9449	94.6638	98.8104	98.8104
SC	UAE 7026_71	bd	0.974268	0.0594764	0.0405095	10.6659	0.00379806	8.40956	84.5325	10.0065	1.23904	0.0603591	0.5	0.831688	1.33612	0.0999347	1.23904	0.92734	616.473	21.5912	614.026	14.4975	614.548	12.2459	99.6031	99.915	99.915
SC	UAE 7026_72	bd	2.48537	0.18762	8.70733	17.1311	0.508276	21.4529	135.773	6.35738	1.28295	0.0740536	0.5	1.60609	1.37694	0.157297	1.28295	0.931741	1042.93	20.1766	941.741	22.4429	972.584	17.0882	90.2978	96.8287	96.8287
SC	UAE 7026_73	bd	1.85692	0.122027	7.96522	15.2069	0.523789	16.0283	120.523	7.67592	1.33296	0.0653993	0.5	1.17475	1.42365	0.130278	1.33296	0.936297	787.207	20.9959	789.449	19.7781	788.863	15.4982	100.285	100.074	100.074
SC	UAE 7026_74	bd	1.09116	0.0786985	1.60995	7.34493	0.219192	9.41857	58.2124	6.29735	1.75479	0.0713507	0.5	1.56222	1.82463	0.158797	1.75479	0.961722	967.477	20.4097	950.087	30.929	955.346	22.3447	98.2026	99.4495	99.4495
SC	UAE 7026_75	bd	0.97359	0.0592281	7.91514	10.3198	0.766988	8.4037	81.7896	9.9059	1.24121	0.0612047	0.5	0.851907	1.33813	0.10095	1.24121	0.927567	646.436	21.4838	619.974	14.6567	625.695	12.4243	95.9065	99.0856	99.0856
SC	UAE 7026_76	bd	2.1752	0.132066	6.09299	23.1235	0.263497	18.7756	183.266	9.90946	1.1455	0.0609115	0.5	0.847521	1.24987	0.100914	1.1455	0.916496	636.111	21.5207	619.761	13.5233	623.288	11.5773	97.4297	99.4342	99.4342
SC	UAE 7026_77	bd	4.33836	0.720761	6.26142	9.9653	0.628322	37.4473	78.9802	2.13104	2.58088	0.162988	0.758224	10.5455	2.68996	0.469254	2.58088	0.959452	2486.9	25.5596	2480.29	105.408	2483.92	48.7081	99.7341	99.8536	99.7341
SC	UAE 7026_78	bd	2.05399	0.122985	9.02427	22.4808	0.401421	17.7294	178.172	10.3004	1.1557	0.0603345	0.5	0.807631	1.25922	0.0970835	1.1557	0.917788	615.594	21.5944	597.295	13.1721	601.124	11.3614	97.0274	99.363	99.363
SC	UAE 7026_79	bd	8.76781	1.07734	19.5015	25.0147	0.779604	75.6808	198.254	2.6794	2.39093	0.122793	0.546316	6.31884	2.45255	0.373218	2.39093	0.974875	1997.2	19.4157	2044.52	83.2398	2021.07	42.1149	102.369	101.16	102.369
SC	UAE 7026_80a	bd	0.981462	0.0689401	2.82665	6.97058	0.405512	8.47165	55.2455	6.62617	1.5776	0.0691101	0.5	1.43807	1.65494	0.150917	1.5776	0.953268	902.029	20.6176	906.1	26.6159	904.916	19.6323	100.451	100.131	100.131
SC	UAE 7026_80b	bd	1.14826	0.0806917	2.81398	7.87252	0.357443	9.91142	62.3939	6.38224	1.46595	0.0692708	0.5	1.49651	1.54887	0.156685	1.46595	0.946462	906.816	20.6022	938.328	25.5516	928.967	18.6819	103.475	101.008	101.008
SC	UAE 7026_81	bd	1.59502	0.0938917	6.67181	16.402	0.406768	13.7677	129.994	9.46907	1.13766	0.0589566	0.5	0.858472	1.24269	0.105607	1.13766	0.915485	565.494	21.7769	647.184	13.9953	629.289	11.5908	114.446	102.844	102.844
SC	UAE 7026_82	bd	1.98497	0.136167	6.10432	14.4515	0.4224	17.1336	114.536	6.74105	1.34177	0.068778	0.5	1.40677	1.43191	0.148345	1.34177	0.937054	892.088	20.6497	891.678	22.3088	891.796	16.856	99.9541	99.9868	99.9868
SC	UAE 7026_83	347.998	0.737347	0.0498644	2.11149	5.72681	0.368703	6.36453	45.388	7.30346	1.52322	0.0668261	0.514011	1.26159	1.60761	0.136921	1.52322	0.947506	832.357	21.4292	827.23	23.6078	828.622	18.05	99.384	99.832	99.832
SC	UAE 7026_84	bd	7.18929	0.529374	14.1593	44.6631	0.317025	62.0556	353.978	5.84178	1.30946	0.0738643	0.5	1.74338	1.40167	0.171181	1.30946	0.934213	1037.76	20.1923	1018.61	24.6288	1024.71	17.9297	98.1547	99.4047	98.1547
SC	UAE 7026_85	bd	2.69568	0.165148	13.8388	28.2978	0.489042	23.2682	224.275	9.69218	1.16024	0.0605649	0.5	0.861591	1.26339	0.103176	1.16024	0.918353	623.817	21.5648	632.995	13.9752	630.991	11.8055	101.471	100.318	100.318
SC	UAE 7026_86	bd	2.82161	0.17414	4.54897	32.996	0.137864	24.3552	261.511	10.7268	1.1183	0.0610396	0.5	0.784591	1.22499	0.0932246	1.1183	0.912907	640.629	21.5045	574.58	12.2832	588.099	10.8784	89.6899	97.7012	97.7012
SC	UAE 7026_87	bd	0.647662	0.0417521	1.85241	5.25837	0.352279	5.59041	41.6753	7.6654	1.5203	0.0643034	0.579083	1.15665	1.62685	0.130456	1.5203	0.934504	751.626	24.4566	790.468	22.5802	780.377	17.5658	105.168	101.293	101.293
SC	UAE 7026_88	bd	4.54326	0.285165	21.529	47.1702	0.456411	39.2159	373.849	9.56217	1.14228	0.0619807	0.5	0.89372	1.24692	0.104579	1.14228	0.916083	673.443	21.3881	641.186	13.9284	648.366	11.8807	95.2102	98.8927	98.8927
SC	UAE 7026_89	bd	1.07319	0.0724743	2.78057	8.68198	0.320269	9.26344	68.8092	7.59623	1.36569	0.0664125	0.5	1.20546	1.45435	0.131644	1.36569	0.939044	819.405	20.8881	797.239	20.4505	803.104	16.0159	97.2949	99.2697	99.2697
SC	UAE 7026_90	bd	0.47583	0.0292927	1.10161	4.71364	0.233706	4.1072	37.3581	9.0726	1.38583	0.0616418	0.511245	0.936796	1.47712	0.110222	1.38583	0.938195	661.705	21.9115	674.037	17.7141	671.204	14.4063	101.864	100.422	100.422
SC	UAE 7026_91	bd	3.82088	0.242336	5.80027	37.4177	0.155014	32.9806	296.555	9.24546	1.16682	0.0625602	0.5	0.932978	1.26943	0.108161	1.16682	0.919163	693.316	21.3183	662.06	14.6665	669.2	12.3671	95.4918	98.9331	98.9331
SC	UAE 7026_92	bd	0.67441	0.0405534	5.71976	7.08201	0.807646	5.82129	56.1287	9.79929	1.29679	0.0602044	0.668774	0.8471	1.45908	0.102048	1.29679	0.88877	610.927	28.9061	626.401	15.4632	623.056	13.4987	102.533	100.537	100.537
SC	UAE 7026_93	602.112	5.73452	0.46223	19.3044	55.4899	0.347889	49.4985	439.787	9.06459	1.17272	0.0819714	1.02081	1.24685	1.55477	0.110319	1.17272	0.754269	1244.83	39.9886	674.603	15.0051	821.984	17.3719	54.1922	82.07	82.07	x	x
SC	UAE 7026_94	bd	3.98637	0.458802	6.20249	12.8189	0.483854	34.409	101.597	2.94073	2.31932	0.114571	0.540776	5.37181	2.38153	0.340052	2.31932	0.973878	1873.15	19.5026	1886.92	75.4377	1880.37	39.9757	100.735	100.348	100.735
SC	UAE 7026_95	bd	0.341328	0.0212611	1.08235	3.55652	0.304328	2.94623	28.1873	9.71174	1.41544	0.0613928	0.686737	0.871609	1.57324	0.102968	1.41544	0.899698	653.024	29.4753	631.78	17.014	636.441	14.7706	96.7469	99.2678	99.2678
SC	UAE 7026_96	bd	0.221138	0.0165328	0.331853	1.3206	0.25129	1.90879	10.4664	5.65109	2.82089	0.0746279	0.723717	1.82083	2.91225	0.176957	2.82089	0.96863	1058.5	29.136	1050.33	54.4511	1052.99	37.4751	99.2285	99.7478	99.2285
SC	UAE 7026_97	bd	0.668012	0.0403818	3.54152	7.25586	0.488092	5.76606	57.5065	10.106	1.19206	0.059641	0.604925	0.813708	1.33677	0.0989515	1.19206	0.89175	590.574	26.2357	608.261	13.8237	604.532	12.1067	102.995	100.617	100.617
SC	UAE 7026_98	bd	3.69447	0.455435	12.6822	10.9361	1.15966	31.8895	86.6747	2.79433	2.78616	0.121868	0.694875	6.0133	2.87151	0.357868	2.78616	0.970279	1983.75	24.734	1972.06	93.9832	1977.77	48.8069	99.4106	99.7112	99.4106
SC	UAE 7026_99	bd	1.0254	0.0622163	1.72077	11.0968	0.155069	8.8509	87.948	9.96851	1.29337	0.0609197	0.510149	0.842615	1.39035	0.100316	1.29337	0.930252	636.401	21.9564	616.26	15.1849	620.588	12.8301	96.8351	99.3027	99.3027
SC	UAE 7026_100	bd	0.714965	0.0557923	0.941256	7.39997	0.127197	6.17134	58.6487	9.53498	1.30927	0.0775418	0.687211	1.12129	1.47867	0.104877	1.30927	0.885442	1135.16	27.3526	642.927	16.0032	763.592	15.7498	56.6376	84.1977	84.1977	x	x
MC	UAE_7422_01	bd	12.3692	0.746555	#N/A	86.7682	#N/A	95.4703	723.127	7.01503	1.04125	0.0667489	0.27296	1.31195	1.07643	0.142551	1.04125	0.967315	829.949	11.3841	859.072	16.7277	850.982	12.3295	103.509	100.951	100.951
MC	UAE_7422_02	1353.53	3.66425	0.434615	#N/A	33.5118	#N/A	28.2821	279.288	9.09919	1.68874	0.13345	4.27857	2.02216	4.59979	0.1099	1.68874	0.367133	2143.85	149.546	672.166	21.5228	1122.99	60.654	31.3532	59.8553	59.8553	x	x
MC	UAE_7422_03	326.573	3.49351	0.233136	#N/A	39.9674	#N/A	26.9643	333.089	11.1954	2.24718	0.0756049	1.10666	0.931136	2.5049	0.0893227	2.24718	0.897115	1084.63	44.3787	551.53	23.7133	668.232	24.2358	50.8497	82.5357	82.5357	x	x
MC	UAE_7422_04	bd	1.71976	0.0969363	#N/A	17.1202	#N/A	13.2738	142.68	10.0641	1.23045	0.0621308	0.993175	0.851203	1.58126	0.099363	1.23045	0.778141	678.615	42.448	610.675	14.3223	625.309	14.659	89.9884	97.6597	97.6597
MC	UAE_7422_05	bd	3.17647	0.176563	#N/A	30.6716	#N/A	24.5172	255.618	9.62347	1.45242	0.0613188	0.611793	0.878544	1.57601	0.103913	1.45242	0.921579	650.436	26.2699	637.298	17.6028	640.196	14.8587	97.9801	99.5473	99.5473
MC	UAE_7422_06	2331.24	5.30184	0.69216	#N/A	63.4214	#N/A	40.9217	528.555	11.6442	1.62159	0.144619	4.98135	1.71244	5.23864	0.0858795	1.62159	0.309544	2283.25	171.489	531.122	16.5135	1013.2	65.0357	23.2616	52.4202	52.4202	x	x
MC	UAE_7422_07	bd	3.60231	0.205964	#N/A	32.0768	#N/A	27.804	267.329	8.9059	1.1125	0.0631622	0.506828	0.977869	1.22251	0.112285	1.1125	0.910014	713.697	21.5374	686.005	14.4633	692.512	12.2007	96.1199	99.0604	99.0604
MC	UAE_7422_08	bd	11.1185	0.592038	#N/A	127.732	#N/A	85.8169	1064.52	11.4371	1.10439	0.0587589	0.244164	0.708367	1.13106	0.0874346	1.10439	0.976422	558.175	10.6474	540.347	11.4384	543.776	9.47967	96.8061	99.3694	99.3694
MC	UAE_7422_09	bd	1.64087	0.109555	#N/A	9.79152	#N/A	12.6649	81.6027	5.91967	1.37332	0.0737399	0.890127	1.71754	1.63656	0.168928	1.37332	0.83915	1034.36	35.966	1006.2	25.5373	1015.11	20.7907	97.2783	99.1232	97.2783
MC	UAE_7422_10	bd	4.29112	0.238573	#N/A	42.8093	#N/A	33.1205	356.773	9.90686	1.35565	0.0615193	0.460364	0.856203	1.43169	0.10094	1.35565	0.946891	657.442	19.7447	619.916	16.0051	628.048	13.3232	94.2922	98.7052	98.7052
MC	UAE_7422_11	bd	9.30006	0.517127	#N/A	96.4498	#N/A	71.7815	803.814	10.4062	1.1911	0.0614577	0.232839	0.814304	1.21365	0.0960968	1.1911	0.981424	655.292	9.98986	591.494	13.4495	604.866	11.0021	90.2641	97.7893	97.7893
MC	UAE_7422_12	bd	1.49028	0.0878571	#N/A	10.8883	#N/A	11.5026	90.7433	6.93819	1.43946	0.0651111	1.0471	1.29393	1.78002	0.14413	1.43946	0.808677	777.93	44.0352	867.973	23.3367	843.038	20.1879	111.575	102.958	102.958
MC	UAE_7422_13	bd	8.1994	0.460002	#N/A	76.6192	#N/A	63.2861	638.546	9.16249	1.34601	0.0619612	0.296598	0.932412	1.3783	0.109141	1.34601	0.976572	672.77	12.6887	667.755	17.0538	668.903	13.4165	99.2546	99.8285	99.8285
MC	UAE_7422_14	bd	2.9201	0.166699	#N/A	27.959	#N/A	22.5385	233.011	9.38621	1.05648	0.0632053	0.600866	0.928462	1.2154	0.106539	1.05648	0.869247	715.146	25.5275	652.618	13.1012	666.825	11.8141	91.2566	97.8694	97.8694
MC	UAE_7422_15	bd	0.6804	0.0364141	#N/A	7.6528	#N/A	5.25159	63.7786	10.8424	1.34119	0.0589154	2.3264	0.74921	2.68531	0.0922303	1.34119	0.499454	563.97	101.35	568.714	14.585	567.766	23.0924	100.841	100.167	100.167
MC	UAE_7422_16	bd	1.28128	0.0735345	#N/A	12.2962	#N/A	9.88942	102.477	9.34072	1.25523	0.0629042	1.26837	0.92854	1.78448	0.107058	1.25523	0.703414	704.995	53.9757	655.64	15.6312	666.866	17.2997	92.9992	98.3165	98.3165
MC	UAE_7422_17	bd	0.492246	0.0293498	#N/A	3.83729	#N/A	3.79935	31.98	7.49793	1.29197	0.0660037	2.73117	1.21375	3.02134	0.13337	1.29197	0.427615	806.494	114.333	807.063	19.5716	806.911	33.095	100.071	100.019	100.019
MC	UAE_7422_18	bd	0.440752	0.0233228	#N/A	4.57933	#N/A	3.40189	38.1642	10.0164	1.48422	0.0587668	3.36773	0.808953	3.68029	0.0998366	1.48422	0.403288	558.467	146.852	613.451	17.3469	601.866	32.8841	109.846	101.925	101.925
MC	UAE_7422_19	5869.58	4.46274	1.42437	#N/A	16.2124	#N/A	34.4452	135.114	3.62297	2.19464	0.334942	5.6733	12.7469	6.08299	0.276017	2.19464	0.360783	3639.85	173.656	1571.27	60.9168	2661.13	108.533	43.1686	59.0452	43.1686	x	x
MC	UAE_7422_20	bd	0.546942	0.0415624	#N/A	4.76792	#N/A	4.22151	39.7359	8.32811	1.47006	0.084343	5.58149	1.39638	5.77184	0.120075	1.47006	0.254695	1300.48	216.923	730.997	20.2864	887.404	66.1012	56.2099	82.3748	82.3748	x	x
MC	UAE_7422_21	2529.55	8.11862	1.57599	#N/A	19.3006	#N/A	62.6627	160.851	2.30185	1.43592	0.214553	0.842768	12.8517	1.66497	0.434434	1.43592	0.862431	2940.26	27.2339	2325.67	55.8266	2668.84	30.8959	79.0976	87.1417	79.0976	x	x
MC	UAE_7422_22	bd	6.99159	0.393874	#N/A	71.4134	#N/A	53.9638	595.16	9.81534	1.16588	0.0618821	0.364702	0.869283	1.22159	0.101881	1.16588	0.954395	670.037	15.6093	625.425	13.8833	635.178	11.4714	93.3418	98.4645	98.4645
MC	UAE_7422_23	bd	1.3937	0.0787117	#N/A	13.0012	#N/A	10.7571	108.352	9.02348	1.33076	0.0625209	1.19269	0.955328	1.78702	0.110822	1.33076	0.744682	691.976	50.8634	677.52	17.0944	680.873	17.5775	97.9109	99.5075	99.5075
MC	UAE_7422_24	bd	1.45648	0.0933882	#N/A	9.41062	#N/A	11.2417	78.4282	6.2112	1.32102	0.071202	1.00338	1.58058	1.65887	0.160999	1.32102	0.796335	963.218	40.9841	962.329	23.5751	962.599	20.4266	99.9076	99.9719	99.9719
MC	UAE_7422_25	bd	2.33989	0.152575	#N/A	15.3679	#N/A	18.0602	128.076	6.31181	1.21284	0.0721725	0.662923	1.57659	1.38219	0.158433	1.21284	0.877477	990.808	26.9636	948.064	21.3505	961.027	17.0315	95.6859	98.6511	98.6511
MC	UAE_7422_26	bd	4.30692	0.283223	#N/A	26.426	#N/A	33.2425	220.235	5.78741	1.32006	0.0725354	0.465561	1.72809	1.39975	0.172789	1.32006	0.943067	1001	18.9067	1027.46	25.0261	1019.04	17.8482	102.643	100.826	102.643
MC	UAE_7422_27	bd	1.85228	0.123754	#N/A	14.5493	#N/A	14.2966	121.254	7.47499	1.44364	0.0711079	1.19792	1.31162	1.87593	0.133779	1.44364	0.76956	960.516	48.9507	809.39	21.9244	850.839	21.3888	84.2662	95.1285	95.1285
MC	UAE_7422_28	bd	2.26759	0.125618	#N/A	21.8453	#N/A	17.5021	182.059	9.34178	1.12804	0.0611464	0.797416	0.902491	1.38143	0.107046	1.12804	0.816574	644.388	34.2747	655.57	14.0476	653.058	13.2214	101.735	100.385	100.385
MC	UAE_7422_29	bd	3.71448	0.224991	#N/A	29.4684	#N/A	28.6698	245.59	7.57682	1.19729	0.0664543	0.487706	1.20931	1.29281	0.131981	1.19729	0.926114	820.717	20.3702	799.159	17.9728	804.873	14.2699	97.3733	99.2901	99.2901
MC	UAE_7422_30	bd	3.71001	0.22607	#N/A	28.4697	#N/A	28.6353	237.267	7.46501	1.06484	0.0677211	0.503716	1.25082	1.17797	0.133958	1.06484	0.903961	860.03	20.9082	810.408	16.1979	823.775	13.2075	94.2302	98.3773	98.3773
MC	UAE_7422_31	2308.65	7.20464	0.831664	#N/A	154.894	#N/A	55.6082	1290.89	20.3389	3.59778	0.12645	1.58791	0.857222	3.93262	0.0491668	3.59778	0.914857	2049.2	56.0962	309.404	21.701	628.605	36.208	15.0988	49.2208	49.2208	x	x
MC	UAE_7422_32	bd	9.91865	0.594453	#N/A	89.1923	#N/A	76.556	743.33	8.38994	1.95053	0.0662082	0.295339	1.08806	1.97276	0.11919	1.95053	0.98873	812.963	12.3508	725.902	26.7262	747.562	20.6642	89.2909	97.1026	97.1026
MC	UAE_7422_33	bd	5.45421	0.342378	#N/A	50.8818	#N/A	42.0977	424.05	8.95611	1.2801	0.0699627	0.493993	1.07708	1.37211	0.111656	1.2801	0.932943	927.258	20.2901	682.356	16.5556	742.208	14.3473	73.5885	91.9359	91.9359		x
MC	UAE_7422_34	bd	0.751947	0.0419795	#N/A	8.06143	#N/A	5.80382	67.1841	10.1275	1.14986	0.0606633	2.09086	0.825893	2.38619	0.0987407	1.14986	0.481881	627.319	90.1254	607.025	13.309	611.331	21.6854	96.765	99.2956	99.2956
MC	UAE_7422_35	bd	3.92908	0.216114	#N/A	42.2035	#N/A	30.3262	351.725	10.1582	1.35773	0.0608584	0.496952	0.826051	1.44582	0.0984431	1.35773	0.939073	634.233	21.3962	605.278	15.669	611.419	13.196	95.4347	98.9957	98.9957
MC	UAE_7422_36	bd	4.83076	0.22128	#N/A	190.988	#N/A	37.2857	1591.7	37.3236	1.17963	0.05065	0.576048	0.18711	1.31277	0.0267927	1.17963	0.898582	224.934	26.6333	170.443	3.96728	174.16	4.1933	75.7748	97.8658	97.8658
MC	UAE_7422_37	bd	3.15928	0.149089	#N/A	124.653	#N/A	24.3845	1038.86	38.4519	1.35668	0.0519658	0.712446	0.186338	1.53237	0.0260065	1.35668	0.885347	283.906	32.5905	165.506	4.43208	173.5	4.8761	58.296	95.3926	95.3926
MC	UAE_7422_38	bd	4.98794	0.26663	#N/A	60.8691	#N/A	38.4989	507.284	11.4402	2.39033	0.0591296	0.42719	0.712641	2.4282	0.0874108	2.39033	0.984403	571.87	18.5857	540.206	24.7254	546.313	20.3141	94.4631	98.882	98.882
MC	UAE_7422_39	bd	12.7161	0.828858	#N/A	86.4596	#N/A	98.1478	720.556	6.16932	2.2105	0.0720795	0.18763	1.61093	2.21845	0.162092	2.2105	0.996417	988.187	7.63465	968.395	39.6302	974.469	27.4229	97.9971	99.3767	99.3767
MC	UAE_7422_40	bd	2.0805	0.114989	#N/A	21.1393	#N/A	16.0581	176.175	9.64971	1.75615	0.0612756	0.854355	0.875538	1.95294	0.10363	1.75615	0.899233	648.923	36.6945	635.647	21.2254	638.57	18.3472	97.9542	99.5424	99.5424
MC	UAE_7422_41	bd	1.86045	0.104041	#N/A	18.7747	#N/A	14.3597	156.469	9.47466	1.25615	0.061502	0.929938	0.895008	1.56291	0.105545	1.25615	0.803723	656.837	39.8885	646.821	15.4429	649.056	14.8807	98.4752	99.6557	99.6557
MC	UAE_7422_42	bd	0.365087	0.019573	#N/A	3.91595	#N/A	2.81788	32.6356	10.2657	1.11443	0.0594732	3.93174	0.798795	4.08663	0.0974121	1.11443	0.272702	584.462	170.696	599.225	12.7414	596.149	36.2004	102.526	100.516	100.516
MC	UAE_7422_43	bd	11.9855	0.816794	#N/A	71.5053	#N/A	92.5087	595.926	5.54568	1.33276	0.0752858	0.169235	1.8718	1.34346	0.180321	1.33276	0.992034	1076.14	6.79521	1068.73	26.1977	1071.17	17.6285	99.3109	99.772	99.3109
MC	UAE_7422_45	bd	2.52018	0.167487	#N/A	16.5608	#N/A	19.4517	138.018	6.19148	2.27234	0.0734803	0.6348	1.63636	2.35935	0.161512	2.27234	0.963124	1027.23	25.677	965.175	40.6102	984.31	29.3118	93.9591	98.0561	98.0561
MC	UAE_7422_46	bd	0.632171	0.034344	#N/A	6.39346	#N/A	4.87934	53.2832	9.69364	1.2039	0.059859	2.4202	0.851421	2.7031	0.10316	1.2039	0.445377	598.482	104.825	632.904	14.4985	625.428	24.9354	105.752	101.195	101.195
MC	UAE_7422_47	bd	1.98168	0.107783	#N/A	20.3671	#N/A	15.2954	169.74	9.79378	1.61553	0.0601548	0.874893	0.846878	1.83722	0.102106	1.61553	0.879335	609.147	37.8263	626.737	19.2682	622.934	16.9657	102.888	100.61	100.61
MC	UAE_7422_48	bd	2.23588	0.134893	#N/A	17.464	#N/A	17.2574	145.545	7.30827	1.76787	0.0666059	0.741794	1.25661	1.91719	0.136831	1.76787	0.922115	825.476	30.9593	826.719	27.3757	826.382	21.4523	100.151	100.041	100.041
MC	UAE_7422_49	bd	1.78157	0.0956487	#N/A	18.9844	#N/A	13.7508	158.216	10.0832	1.10598	0.0600218	0.987384	0.820751	1.4826	0.0991749	1.10598	0.745969	604.359	42.7242	609.571	12.8527	608.467	13.4821	100.862	100.181	100.181
MC	UAE_7422_50	bd	10.3432	1.13778	#N/A	30.2712	#N/A	79.8328	252.281	2.81285	1.6097	0.121466	0.145492	5.95402	1.61626	0.355511	1.6097	0.99594	1977.88	5.18231	1960.86	54.2022	1969.15	27.7207	99.1397	99.5789	99.1397
MC	UAE_7422_51	bd	0.121309	0.0069853	#N/A	0.980891	#N/A	0.93631	8.17476	7.67708	1.25163	0.0632227	9.73883	1.13548	9.81893	0.130258	1.25163	0.127471	715.732	413.71	789.336	18.5706	770.361	100.847	110.284	102.463	102.463
MC	UAE_7422_52	bd	3.95691	0.231755	#N/A	31.9675	#N/A	30.541	266.418	7.62814	1.06508	0.0648802	0.508009	1.17272	1.18003	0.131093	1.06508	0.902589	770.454	21.3897	794.101	15.8957	787.917	12.8527	103.069	100.785	100.785
MC	UAE_7422_53	bd	0.19024	0.0103318	#N/A	1.9849	#N/A	1.46835	16.5422	9.86969	1.62332	0.0598144	6.82392	0.83561	7.01434	0.10132	1.62332	0.231429	596.868	295.642	622.141	19.226	616.72	62.8577	104.234	100.879	100.879
MC	UAE_7422_54	bd	3.90783	0.216564	#N/A	37.8672	#N/A	30.1621	315.586	9.10661	1.11346	0.0612004	0.501948	0.926615	1.22137	0.10981	1.11346	0.911648	646.286	21.5681	671.646	14.1886	665.852	11.8597	103.924	100.87	100.87
MC	UAE_7422_55	bd	21.5218	1.94118	#N/A	84.8072	#N/A	166.114	706.784	3.64281	1.27719	0.0996286	0.117986	3.77093	1.28262	0.274513	1.27719	0.99576	1617.16	4.39327	1563.67	35.3695	1586.58	20.3816	96.6924	98.5561	96.6924
MC	UAE_7422_56	bd	1.50975	0.0838727	#N/A	13.5534	#N/A	11.6528	112.954	8.25853	1.34692	0.0615032	1.12092	1.02682	1.75233	0.121087	1.34692	0.768645	656.879	48.0801	736.817	18.7291	717.338	17.8702	112.169	102.715	102.715
MC	UAE_7422_57	851.175	5.73573	0.432052	#N/A	77.983	#N/A	44.2706	649.911	12.8537	2.05601	0.0835643	1.34009	0.896385	2.45419	0.0777987	2.05601	0.837757	1282.43	52.2154	482.97	19.1058	649.794	23.2887	37.6606	74.3267	74.3267	x	x
MC	UAE_7422_58	bd	8.98517	0.520683	#N/A	76.4082	#N/A	69.351	636.787	8.17019	1.34038	0.0642425	0.273272	1.08416	1.36796	0.122396	1.34038	0.979844	749.624	11.5449	744.341	18.8177	745.66	14.349	99.2953	99.823	99.823
MC	UAE_7422_59	bd	6.15764	0.393632	#N/A	51.114	#N/A	47.5271	425.985	7.72557	1.58646	0.0704431	0.962166	1.25721	1.85543	0.12944	1.58646	0.855036	941.298	39.4338	784.672	23.3989	826.656	20.7726	83.3606	94.9212	94.9212		x
MC	UAE_7422_60	bd	2.12587	0.125776	#N/A	17.2241	#N/A	16.4083	143.546	7.56328	1.22686	0.0655088	0.776538	1.19424	1.45196	0.132218	1.22686	0.844967	790.72	32.5898	800.505	18.4452	797.923	15.9226	101.237	100.324	100.324
MC	UAE_7422_61	bd	1.34624	0.0651933	#N/A	29.2252	#N/A	10.3908	243.563	20.1763	1.08095	0.0536016	1.35896	0.3663	1.73644	0.049563	1.08095	0.622509	354.349	61.3894	311.838	6.57782	316.908	9.41017	88.0032	98.4004	98.4004
MC	UAE_7422_62	bd	6.05478	0.333271	#N/A	61.8831	#N/A	46.7331	515.735	9.63718	1.67609	0.0606763	0.344156	0.868102	1.71106	0.103765	1.67609	0.979563	627.779	14.8335	636.434	20.2832	634.536	16.0201	101.379	100.299	100.299
MC	UAE_7422_65	bd	0.495896	0.0292593	#N/A	4.0409	#N/A	3.82752	33.6769	7.45784	1.19149	0.0649544	2.74198	1.20087	2.98967	0.134087	1.19149	0.398536	772.859	115.407	811.139	18.1371	800.989	32.5983	104.953	101.267	101.267
MC	UAE_7422_66	bd	5.2108	0.276074	#N/A	64.9669	#N/A	40.219	541.435	11.3582	1.59685	0.0584935	0.483491	0.710066	1.66844	0.0880421	1.59685	0.957092	548.294	21.1193	543.947	16.6378	544.786	13.9722	99.2072	99.8461	99.8461
MC	UAE_7422_67	bd	0.555207	0.0303479	#N/A	5.95233	#N/A	4.2853	49.6068	9.94222	1.47817	0.0602224	2.64263	0.835172	3.02795	0.100581	1.47817	0.488175	611.574	114.209	617.814	17.3933	616.478	27.6052	101.02	100.217	100.217
MC	UAE_7422_68	bd	2.32619	0.132079	#N/A	21.4962	#N/A	17.9544	179.15	8.542	1.62193	0.0627454	0.753913	1.0128	1.78859	0.117069	1.62193	0.906822	699.613	32.1111	713.669	21.8778	710.288	18.114	102.009	100.476	100.476
MC	UAE_7422_69	bd	0.154673	0.00665185	#N/A	132.842	#N/A	1.19383	1107.11	810.824	1.39127	0.0467293	10.1807	0.00794629	10.2753	0.00123331	1.39127	0.135399	35.4173	487.519	7.94555	0.220949	8.03664	1.64373	22.4341	98.8666	98.8666
MC	UAE_7422_70	bd	1.19718	0.0807526	#N/A	8.97381	#N/A	9.2403	74.7879	7.01152	1.18534	0.0753196	1.72671	1.48114	2.09441	0.142622	1.18534	0.565955	1077.04	69.3222	859.475	19.0474	922.699	25.078	79.7995	93.1479	93.1479		x
MC	UAE_7422_71	1659.12	10.2899	0.884276	#N/A	193.937	#N/A	79.4214	1616.27	16.5456	3.93327	0.0938546	1.60378	0.782122	4.24767	0.0604391	3.93327	0.925983	1505.19	60.6031	378.295	28.8378	586.693	37.1685	25.1327	64.4792	64.4792	x	x
MC	UAE_7422_72	bd	17.3835	2.90488	#N/A	35.2594	#N/A	134.173	293.852	1.91861	1.40865	0.184537	0.16914	13.2617	1.41877	0.521211	1.40865	0.992868	2694.07	5.58842	2704.32	61.928	2698.46	26.4442	100.38	100.217	100.38
MC	UAE_7422_73	bd	4.1017	0.221852	#N/A	44.7195	#N/A	31.6585	372.693	9.97429	1.88037	0.0597727	0.51728	0.82627	1.95022	0.100258	1.88037	0.964182	595.355	22.4165	615.919	22.0532	611.54	17.7622	103.454	100.716	100.716
MC	UAE_7422_74	bd	3.58997	0.197571	#N/A	38.2505	#N/A	27.7088	318.78	9.84195	1.39913	0.0606872	0.558718	0.850192	1.50657	0.101606	1.39913	0.928691	628.165	24.0798	623.813	16.6165	624.754	13.9624	99.3072	99.8493	99.8493
MC	UAE_7422_75	bd	2.96908	0.172235	#N/A	30.4113	#N/A	22.9165	253.448	9.40326	1.43486	0.063857	0.670561	0.936335	1.58382	0.106346	1.43486	0.905951	736.896	28.3877	651.493	17.7579	670.962	15.4352	88.4104	97.0983	97.0983
MC	UAE_7422_77	bd	0.730992	0.0417776	#N/A	6.75939	#N/A	5.36944	52.2552	8.87266	1.18055	0.0621685	2.00146	0.96609	2.32369	0.112706	1.18055	0.508049	679.91	85.5237	688.442	15.3985	686.446	22.9266	101.255	100.291	100.291
MC	UAE_7422_78	bd	3.21466	0.180404	#N/A	32.6831	#N/A	23.613	252.665	9.69247	1.06766	0.0616016	0.588589	0.876312	1.21915	0.103173	1.06766	0.875738	660.307	25.2323	632.976	12.8608	638.989	11.4977	95.8608	99.059	99.059
MC	UAE_7422_79	bd	0.917867	0.0513966	#N/A	9.04804	#N/A	6.74211	69.9482	9.416	1.5003	0.0615699	1.67386	0.901578	2.24782	0.106202	1.5003	0.667446	659.203	71.7699	650.654	18.5439	652.57	21.4152	98.7031	99.7063	99.7063
MC	UAE_7422_80	bd	4.05728	0.221422	#N/A	41.6487	#N/A	29.8024	321.976	9.76574	1.27718	0.0605271	0.508728	0.854567	1.37477	0.102399	1.27718	0.929013	622.472	21.9461	628.451	15.2771	627.153	12.7837	100.961	100.207	100.207
MC	UAE_7422_81	bd	5.14387	0.361842	#N/A	28.2449	#N/A	37.7838	218.354	5.25365	1.85964	0.0774467	0.351798	2.03256	1.89262	0.190344	1.85964	0.982573	1132.71	14.0074	1123.24	38.2256	1126.47	25.4393	99.1632	99.7128	99.1632
MC	UAE_7422_82	bd	2.67299	0.172146	#N/A	17.6404	#N/A	19.6342	136.374	6.2702	1.10153	0.0713314	0.582982	1.56856	1.24629	0.159485	1.10153	0.883848	966.925	23.799	953.912	19.5048	957.856	15.3393	98.6543	99.5882	99.5882
MC	UAE_7422_83	bd	1.03806	0.0560778	#N/A	10.8011	#N/A	7.62498	83.5006	10.0029	1.25196	0.05972	1.5843	0.823184	2.01926	0.0999714	1.25196	0.620011	593.446	68.6782	614.241	14.6535	609.824	18.348	103.504	100.724	100.724
MC	UAE_7422_84	bd	1.05762	0.0577633	#N/A	11.0184	#N/A	7.76865	85.1805	9.88498	1.10384	0.0602888	1.54084	0.840935	1.89543	0.101164	1.10384	0.582369	613.955	66.5652	621.225	13.0613	619.661	17.4324	101.184	100.252	100.252
MC	UAE_7422_85	bd	0.949423	0.0568346	#N/A	7.38583	#N/A	6.9739	57.098	7.35939	1.11678	0.0658451	1.54888	1.23362	1.90951	0.135881	1.11678	0.584852	801.455	64.8919	821.328	17.2013	815.988	21.1941	102.48	100.654	100.654
MC	UAE_7422_86	bd	4.25226	0.762475	#N/A	8.2535	#N/A	31.2346	63.8058	1.83539	1.1302	0.197761	0.177238	14.8564	1.14401	0.544845	1.1302	0.987926	2807.81	5.79497	2803.7	51.1878	2806.09	21.5371	99.8537	99.9148	99.8537
MC	UAE_7422_87	bd	3.55343	0.201894	#N/A	34.1933	#N/A	26.1014	264.34	9.01332	2.8785	0.0627224	0.533494	0.959487	2.92752	0.110947	2.8785	0.983255	698.834	22.7258	678.244	36.9565	683.031	28.7015	97.0538	99.2992	99.2992
MC	UAE_7422_88	bd	5.63114	0.308111	#N/A	56.0662	#N/A	41.363	433.434	9.48258	1.1687	0.0608745	0.369347	0.885136	1.22568	0.105457	1.1687	0.953516	634.801	15.9007	646.307	14.3582	643.753	11.6203	101.813	100.397	100.397
MC	UAE_7422_89	bd	1.30204	0.0729795	#N/A	13.1514	#N/A	9.56402	101.67	9.42373	1.1237	0.0612161	1.26925	0.895662	1.6952	0.106115	1.1237	0.662873	646.836	54.5332	650.146	13.8838	649.407	16.1365	100.512	100.114	100.114
MC	UAE_7422_90	bd	11.448	0.791375	#N/A	65.51	#N/A	84.0903	506.442	5.40762	1.21176	0.0762772	0.179958	1.94487	1.22505	0.184924	1.21176	0.989152	1102.36	7.1976	1093.82	24.336	1096.68	16.2986	99.2257	99.7394	99.2257
MC	UAE_7422_91	bd	6.36793	0.340543	#N/A	73.5308	#N/A	46.7751	568.448	10.8243	1.46487	0.0591375	0.334155	0.753291	1.5025	0.0923843	1.46487	0.974956	572.163	14.5374	569.623	15.9526	570.132	13.0255	99.556	99.9107	99.9107
MC	UAE_7422_92	bd	5.31191	0.308044	#N/A	55.9845	#N/A	39.0182	432.802	9.80601	1.37074	0.0632987	0.634916	0.890028	1.51064	0.101978	1.37074	0.907388	718.281	26.9603	625.992	16.3338	646.384	14.3445	87.1515	96.8452	96.8452
MC	UAE_7422_93	bd	6.51266	0.402296	#N/A	62.1557	#N/A	47.8382	480.51	8.98077	1.33444	0.0674021	0.691755	1.03481	1.50308	0.111349	1.33444	0.887802	850.224	28.7578	680.578	17.2148	721.332	15.4056	80.0469	94.3502	94.3502		x
MC	UAE_7422_94	bd	1.32923	0.074673	#N/A	12.8693	#N/A	9.76374	99.4894	9.22986	1.26659	0.0618438	1.22222	0.923853	1.76014	0.108344	1.26659	0.719597	668.713	52.3229	663.124	15.9432	664.395	17.0213	99.1641	99.8086	99.8086
MC	UAE_7422_95	bd	1.13053	0.0625581	#N/A	11.2784	#N/A	8.30421	87.1905	9.48258	1.05072	0.0606136	1.41126	0.881343	1.75945	0.105457	1.05072	0.597189	625.552	60.8493	646.307	12.9102	641.708	16.6019	103.318	100.717	100.717
MC	UAE_7422_96	bd	0.377798	0.0207491	#N/A	3.44642	#N/A	2.77508	26.6434	8.68192	1.3734	0.060488	3.73601	0.960626	3.98045	0.115182	1.3734	0.345036	621.075	161.206	702.772	18.2628	683.621	38.8523	113.154	102.801	102.801
MC	UAE_7422_97	bd	2.16603	0.141692	#N/A	12.8541	#N/A	15.9104	99.3719	5.5762	1.1309	0.0720963	0.712171	1.78269	1.33646	0.179334	1.1309	0.846191	988.661	28.9762	1063.33	22.1335	1039.16	17.2399	107.553	102.326	107.553		x
MC	UAE_7422_98	bd	8.11794	0.546374	#N/A	48.018	#N/A	59.6296	371.215	5.58696	1.22544	0.0739289	0.278428	1.82448	1.25667	0.178988	1.22544	0.975147	1039.53	11.2412	1061.44	23.9413	1054.3	16.3523	102.108	100.678	102.108
MC	UAE_7422_99	bd	1.28054	0.0830565	#N/A	10.0288	#N/A	9.40609	77.5302	7.41556	1.04923	0.0710387	1.1374	1.32085	1.54744	0.134852	1.04923	0.678041	958.528	46.4921	815.483	16.0544	854.883	17.7289	85.0766	95.3911	95.3911
MC	UAE_7422_100	bd	16.9724	1.11282	#N/A	123.44	#N/A	124.669	954.284	6.73084	1.23384	0.0718965	0.138924	1.47278	1.24164	0.14857	1.23384	0.993721	983.011	5.65731	892.941	20.5441	919.272	14.9078	90.8374	97.1357	97.1357
MC	UAE_7422_101	bd	2.79259	0.158965	#N/A	29.5318	#N/A	20.5127	228.303	9.9443	1.10073	0.0624452	0.718536	0.865817	1.3145	0.10056	1.10073	0.837378	689.392	30.6556	617.69	12.954	633.293	12.3123	89.5993	97.5362	97.5362
MC	UAE_7422_102	bd	3.39266	0.184249	#N/A	39.1648	#N/A	24.9205	302.773	10.9975	1.05161	0.0601224	0.575122	0.75378	1.1986	0.0909299	1.05161	0.877363	607.984	24.8704	561.034	11.291	570.415	10.4082	92.2778	98.3554	98.3554
MC	UAE_7422_103	bd	5.61603	0.315345	#N/A	57.4958	#N/A	41.252	444.486	9.60242	1.1678	0.0619682	0.368783	0.889794	1.22464	0.10414	1.1678	0.953582	673.013	15.7762	638.628	14.1851	646.259	11.6427	94.8909	98.8192	98.8192
MC	UAE_7422_104	bd	17.0318	1.71109	#N/A	64.2023	#N/A	125.106	496.332	3.52808	1.42162	0.11064	0.13158	4.32388	1.42769	0.283441	1.42162	0.995744	1809.94	4.7819	1608.67	40.3513	1697.93	23.2784	88.8794	94.743	88.8794	x	x
MC	UAE_7422_105	bd	8.72008	0.789293	#N/A	48.6759	#N/A	64.0526	376.301	5.19205	1.19572	0.0997157	0.273791	2.64805	1.22667	0.192602	1.19572	0.974773	1618.79	10.1926	1135.46	24.8489	1314.1	17.9231	70.1424	86.4055	70.1424	x	x
MC	UAE_7422_106	bd	3.07155	0.183231	#N/A	28.6369	#N/A	22.5618	221.385	8.82688	1.4478	0.0657452	0.588243	1.02697	1.56274	0.11329	1.4478	0.92645	798.272	24.6576	691.828	18.9672	717.411	15.953	86.6657	96.4341	96.4341
MC	UAE_7422_107	bd	0.162933	0.00694842	#N/A	24.8768	#N/A	1.19681	192.316	143.83	1.10151	0.046504	9.73746	0.0445801	9.79956	0.00695264	1.10151	0.112404	23.8314	467.315	44.6645	0.980491	44.2859	8.45777	187.418	100.855	100.855
MC	UAE_7422_108	bd	0.871591	0.052112	#N/A	6.91638	#N/A	6.40219	53.4688	7.39401	1.17012	0.065809	1.67998	1.22718	2.04732	0.135245	1.17012	0.571537	800.306	70.3975	817.716	17.9475	813.052	22.654	102.175	100.574	100.574
MC	UAE_7422_109	bd	0.266351	0.0449851	#N/A	2.50941	#N/A	1.95646	19.3996	8.88897	1.11354	0.18764	1.90268	2.91056	2.20458	0.112499	1.11354	0.505105	2721.59	62.7035	687.245	14.5016	1384.66	32.7863	25.2516	49.6328	49.6328	x	x
MC	UAE_7422_110	bd	3.82838	0.242845	#N/A	58.2669	#N/A	28.121	450.447	13.9736	2.31679	0.0697501	0.476478	0.688238	2.36528	0.0715637	2.31679	0.9795	921.004	19.5897	445.57	19.9177	531.742	19.3952	48.3787	83.7944	83.7944	x	x
MC	UAE_7422_111	bd	4.04153	0.233804	#N/A	37.1714	#N/A	29.6867	287.363	8.5185	1.08536	0.0634929	0.47793	1.02769	1.18593	0.117392	1.08536	0.9152	724.781	20.2728	715.533	14.6845	717.773	12.1334	98.7241	99.6879	99.6879
MC	UAE_7422_112	bd	1.15824	0.068834	#N/A	9.46754	#N/A	8.50775	73.1912	7.55208	1.24279	0.0653206	1.30751	1.19257	1.80391	0.132414	1.24279	0.68894	784.679	54.9269	801.621	18.7086	797.152	19.7324	102.159	100.561	100.561
MC	UAE_7422_113	bd	1.00557	0.0552445	#N/A	10.2153	#N/A	7.38632	78.972	9.42328	1.0634	0.060711	1.59339	0.888314	1.91565	0.10612	1.0634	0.555112	629.01	68.6628	650.176	13.1401	645.463	18.1377	103.365	100.73	100.73
MC	UAE_7422_114	bd	13.485	2.03017	#N/A	30.3479	#N/A	99.0529	234.612	2.09458	1.02964	0.165986	0.208877	10.9264	1.05062	0.477424	1.02964	0.980037	2517.57	7.01977	2516.03	42.7556	2516.88	19.3609	99.9391	99.9663	99.9391
MC	UAE_7422_115	bd	4.91545	0.274791	#N/A	60.9764	#N/A	36.106	471.393	11.6849	1.08713	0.06158	1.15065	0.726635	1.58299	0.0855805	1.08713	0.686759	659.556	49.3333	529.346	11.04	554.576	13.4393	80.2579	95.4506	95.4506
MC	UAE_7422_116	bd	2.61618	0.159226	#N/A	19.8221	#N/A	19.2169	153.24	6.99135	1.18578	0.067093	0.651447	1.32317	1.35294	0.143034	1.18578	0.876444	840.661	27.1232	861.795	19.1024	855.902	15.5292	102.514	100.689	100.689
MC	UAE_7422_117	bd	1.93639	0.105478	#N/A	20.4741	#N/A	14.2236	158.28	9.42877	1.50145	0.0608376	0.901908	0.889647	1.75151	0.106058	1.50145	0.857232	633.496	38.8362	649.816	18.5354	646.18	16.6094	102.576	100.563	100.563
MC	UAE_7422_118	bd	0.527885	0.0327607	#N/A	4.09099	#N/A	3.87753	31.6264	7.22857	1.05875	0.0681357	2.65524	1.29964	2.85854	0.13834	1.05875	0.370381	872.683	109.994	835.268	16.5676	845.563	32.2882	95.7126	98.7825	98.7825
MC	UAE_7422_119	bd	0.697686	0.0313763	#N/A	26.7629	#N/A	5.12479	206.897	35.7837	1.02379	0.0496472	2.5891	0.191298	2.78417	0.0279457	1.02379	0.367717	178.511	120.725	177.678	3.58741	177.736	9.03882	99.5334	99.9672	99.9672
MC	UAE_6380_01	bd	1.22699	0.0662026	#N/A	14.1359	#N/A	8.52414	87.2932	9.33316	1.11865	0.0595191	1.34631	0.879283	1.7504	0.107145	1.11865	0.639079	586.135	58.4332	656.145	13.9424	640.595	16.4969	111.944	102.427	102.427
MC	UAE_6380_02	bd	0.994559	0.0574505	#N/A	9.49666	#N/A	6.9094	58.6446	7.78186	1.13927	0.0636727	1.53425	1.12816	1.91098	0.128504	1.13927	0.596167	730.775	65.0162	779.326	16.7041	766.876	20.3667	106.644	101.623	101.623
MC	UAE_6380_03	bd	3.21081	0.181256	#N/A	33.1223	#N/A	22.3061	204.54	8.47184	1.08315	0.0623716	0.598457	1.0151	1.23749	0.118038	1.08315	0.875285	686.876	25.5432	719.262	14.7268	711.449	12.5812	104.715	101.098	101.098
MC	UAE_6380_04	bd	1.47736	0.0805199	#N/A	17.2495	#N/A	10.2635	106.521	9.48711	1.12314	0.0603884	1.14624	0.877649	1.60478	0.105406	1.12314	0.699874	617.518	49.4889	646.014	13.7932	639.712	15.1198	104.615	100.985	100.985
MC	UAE_6380_05	bd	0.708546	0.0374387	#N/A	9.93189	#N/A	4.92241	61.3323	11.4363	1.07583	0.0578431	2.27325	0.697376	2.51497	0.0874408	1.07583	0.427771	523.824	99.7115	540.384	11.1436	537.223	20.7698	103.161	100.588	100.588
MC	UAE_6380_06	bd	1.1576	0.064179	#N/A	12.6562	#N/A	8.04207	78.1557	8.95473	1.04384	0.0613348	1.39898	0.944399	1.74549	0.111673	1.04384	0.598018	650.995	60.0655	682.456	13.5051	675.182	17.0723	104.833	101.077	101.077
MC	UAE_6380_07	bd	3.52455	0.236973	#N/A	24.2928	#N/A	24.4857	150.015	5.6674	1.09662	0.0742462	0.484294	1.80631	1.19879	0.176448	1.09662	0.914766	1048.17	19.5274	1047.54	21.1706	1047.74	15.55	99.94	99.9805	99.94
MC	UAE_6380_08	bd	8.05773	1.09702	#N/A	23.9947	#N/A	55.9786	148.174	2.41337	1.1455	0.150277	0.167786	8.58563	1.15772	0.414359	1.1455	0.989442	2349.09	5.73627	2234.82	43.1228	2295.03	20.8425	95.1357	97.3763	95.1357
MC	UAE_6380_09	bd	1.63535	0.0896996	#N/A	19.1576	#N/A	11.3611	118.304	9.54551	1.11081	0.0605814	1.0362	0.875068	1.51908	0.104761	1.11081	0.731238	624.405	44.6863	642.252	13.5663	638.315	14.2956	102.858	100.617	100.617
MC	UAE_6380_10	bd	15.75	2.60957	#N/A	37.3804	#N/A	109.418	230.835	1.94103	1.06325	0.183839	0.0873752	13.0589	1.06683	0.51519	1.06325	0.99664	2687.81	2.88859	2678.75	46.4428	2683.92	19.9271	99.6627	99.8074	99.6627
MC	UAE_6380_11	bd	0.760629	0.0412602	#N/A	8.4489	#N/A	5.28424	52.1744	8.95176	1.10774	0.0600903	2.05874	0.925545	2.33784	0.11171	1.10774	0.473831	606.829	89.0451	682.67	14.3352	665.288	22.5675	112.498	102.613	102.613
MC	UAE_6380_12	bd	1.694	0.0913886	#N/A	19.467	#N/A	11.7686	120.214	9.17971	1.10109	0.0597033	1.02989	0.896749	1.50767	0.108936	1.10109	0.730327	592.838	44.6495	666.565	13.9305	649.989	14.3731	112.436	102.55	102.55
MC	UAE_6380_13	bd	2.07615	0.112703	#N/A	25.7624	#N/A	14.4234	159.09	9.97659	1.12262	0.0596576	0.876103	0.82449	1.42402	0.100235	1.12262	0.788346	591.179	37.9929	615.784	13.1726	610.55	12.9849	104.162	100.857	100.857
MC	UAE_6380_14	bd	3.5908	0.222761	#N/A	29.3819	#N/A	24.946	181.442	6.59935	1.0923	0.0690215	0.494239	1.44206	1.19891	0.15153	1.0923	0.911076	899.382	20.3885	909.534	18.5051	906.578	14.2764	101.129	100.326	100.326
MC	UAE_6380_15	bd	4.14888	0.26812	#N/A	31.9303	#N/A	28.8231	197.179	6.17985	1.063	0.0714966	0.436407	1.59518	1.1491	0.161816	1.063	0.925076	971.644	17.8025	966.862	19.0601	968.324	14.2432	99.5078	99.849	99.849
MC	UAE_6380_16	bd	0.532086	0.0295605	#N/A	6.31219	#N/A	3.69651	38.9796	9.49979	1.19544	0.0613402	2.71434	0.890293	2.96592	0.105266	1.19544	0.403057	651.186	116.537	645.193	14.6622	646.527	27.9786	99.0797	99.7938	99.7938
MC	UAE_6380_17	bd	3.25851	0.179684	#N/A	39.0699	#N/A	22.6375	241.268	9.73154	1.11114	0.0609836	0.579307	0.864037	1.25308	0.102759	1.11114	0.886721	638.655	24.9236	630.555	13.3353	632.325	11.7276	98.7319	99.7202	99.7202
MC	UAE_6380_18	bd	0.529739	0.0297648	#N/A	5.4937	#N/A	3.6802	33.9252	8.44634	1.17095	0.0627315	2.73634	1.02404	2.97636	0.118394	1.17095	0.393417	699.141	116.557	721.316	15.9619	715.944	30.129	103.172	100.75	100.75
MC	UAE_6380_19	bd	3.87099	0.212805	#N/A	48.6365	#N/A	26.8925	300.344	10.084	1.24541	0.0605569	0.497473	0.828005	1.34109	0.0991672	1.24541	0.928654	623.532	21.4568	609.527	14.4703	612.505	12.2617	97.7538	99.5138	99.5138
MC	UAE_6380_20	bd	6.86626	0.819791	#N/A	27.3172	#N/A	47.7013	168.692	3.17379	1.17998	0.132092	0.231002	5.73853	1.20238	0.315081	1.17998	0.981371	2125.97	8.09015	1765.66	36.347	1937.19	20.584	83.0521	91.1454	83.0521	x	x
MC	UAE_6380_21	bd	1.52482	0.0890437	#N/A	12.1018	#N/A	12.7301	100.55	7.37685	1.24217	0.0639249	1.06467	1.19481	1.636	0.135559	1.24217	0.75927	739.148	45.0556	819.502	19.0899	798.19	17.927	110.871	102.67	102.67
MC	UAE_6380_22	bd	11.8492	1.80292	#N/A	28.3231	#N/A	98.9242	235.328	2.20957	1.59055	0.166799	0.114663	10.4085	1.59468	0.452577	1.59055	0.997412	2525.78	3.85035	2406.7	63.5779	2471.81	29.1239	95.2854	97.366	95.2854
MC	UAE_6380_23	bd	0.950536	0.0571974	#N/A	7.19404	#N/A	7.93564	59.773	6.94912	1.15738	0.0659322	1.53369	1.30819	1.92139	0.143903	1.15738	0.602369	804.223	64.2269	866.696	18.7446	849.329	21.8769	107.768	102.045	102.045
MC	UAE_6380_24	bd	5.37183	0.29483	#N/A	56.9139	#N/A	44.8472	472.879	9.80824	1.35309	0.0605009	0.396087	0.850496	1.40987	0.101955	1.35309	0.959726	621.538	17.0896	625.856	16.1204	624.921	13.0745	100.695	100.15	100.15
MC	UAE_6380_25	bd	7.79506	1.12962	#N/A	20.439	#N/A	65.0778	169.821	2.43318	1.11158	0.158835	0.206469	9.00064	1.1306	0.410985	1.11158	0.983184	2443.3	6.99069	2219.42	41.6094	2338.07	20.4565	90.8373	94.9254	90.8373		x
MC	UAE_6380_26	bd	0.244587	0.0134347	#N/A	2.47416	#N/A	2.04196	20.557	9.46089	1.51252	0.0610645	5.40422	0.889935	5.61189	0.105698	1.51252	0.269521	641.507	232.397	647.717	18.6146	646.334	52.2937	100.968	100.214	100.214
MC	UAE_6380_27	bd	0.692146	0.0373667	#N/A	7.68141	#N/A	5.77845	63.8224	10.2203	1.50423	0.0592405	2.21136	0.7992	2.67448	0.0978444	1.50423	0.562439	575.944	96.1436	601.764	17.2614	596.377	23.8433	104.483	100.903	100.903
MC	UAE_6380_28	bd	0.610697	0.0335196	#N/A	6.64952	#N/A	5.09846	55.2487	9.80805	1.62005	0.0597654	2.44474	0.840173	2.9328	0.101957	1.62005	0.552389	595.092	105.948	625.868	19.2965	619.241	26.8349	105.172	101.07	101.07
MC	UAE_6380_29	bd	1.61375	0.102006	#N/A	11.1668	#N/A	13.4725	92.7814	6.45166	1.34708	0.0695943	0.943064	1.48732	1.64439	0.154999	1.34708	0.819201	916.408	38.8005	928.924	23.2651	925.222	19.7743	101.366	100.4	100.4
MC	UAE_6380_30	bd	0.441478	0.0239965	#N/A	4.79098	#N/A	3.68572	39.8067	10.1538	1.49877	0.059588	3.26473	0.809155	3.59232	0.0984853	1.49877	0.417215	588.647	141.638	605.526	17.3012	601.98	32.1147	102.867	100.589	100.589
MC	UAE_6380_31	bd	0.694853	0.0370751	#N/A	7.43833	#N/A	5.80105	61.8027	9.83633	1.18115	0.0584903	2.2431	0.819883	2.53507	0.101664	1.18115	0.465922	548.176	97.9824	624.153	14.0377	607.983	22.9322	113.86	102.66	102.66
MC	UAE_6380_32	bd	2.101	0.114431	#N/A	22.6972	#N/A	17.5404	188.584	9.857	1.13698	0.0592642	0.828889	0.82899	1.40704	0.101451	1.13698	0.80806	576.817	36.0324	622.905	13.4876	613.052	12.8692	107.99	101.607	101.607
MC	UAE_6380_33	bd	1.50532	0.0807358	#N/A	17.1595	#N/A	12.5673	142.573	10.3408	1.16027	0.0589214	1.14127	0.785637	1.62749	0.0967047	1.16027	0.71292	564.192	49.7175	595.068	13.1771	588.694	14.4382	105.473	101.083	101.083
MC	UAE_6380_34	bd	0.693257	0.0408641	#N/A	5.94004	#N/A	5.78772	49.3539	7.77441	1.16899	0.0646085	2.0512	1.14584	2.36092	0.128627	1.16899	0.495139	761.613	86.4893	780.028	17.1538	775.276	25.2842	102.418	100.613	100.613
MC	UAE_6380_35	bd	0.543661	0.0293774	#N/A	6.11978	#N/A	4.53881	50.8473	10.2796	1.13337	0.0594195	2.71885	0.796993	2.94562	0.0972803	1.13337	0.384765	582.499	118.077	598.451	12.9417	595.131	26.1898	102.738	100.558	100.558
MC	UAE_6380_36	bd	2.99712	0.175943	#N/A	26.9231	#N/A	25.0217	223.695	8.12171	1.09469	0.0644252	0.601932	1.09373	1.24926	0.123127	1.09469	0.876265	755.621	25.4052	748.535	15.454	750.314	13.1669	99.0623	99.763	99.763
MC	UAE_6380_37	bd	0.438178	0.023358	#N/A	5.26147	#N/A	3.65817	43.7159	10.8532	1.21708	0.0583763	3.33292	0.741615	3.54819	0.0921384	1.21708	0.343014	543.914	145.693	568.171	13.2247	563.348	30.2282	104.46	100.856	100.856
MC	UAE_6380_38	bd	0.455984	0.0247686	#N/A	5.24736	#N/A	3.80683	43.5986	10.3547	1.15544	0.0593172	3.20587	0.789847	3.40773	0.0965741	1.15544	0.339065	578.758	139.316	594.301	13.1062	591.085	30.0886	102.685	100.544	100.544
MC	UAE_6380_39	bd	1.30182	0.0694174	#N/A	15.8207	#N/A	10.8684	131.449	11.0137	1.21041	0.0584445	1.28425	0.731666	1.76476	0.0907962	1.21041	0.685874	546.465	56.1147	560.244	12.9768	557.53	15.0306	102.521	100.487	100.487
MC	UAE_6380_40	bd	0.460606	0.0271931	#N/A	3.84623	#N/A	3.84541	31.9571	7.55302	1.19194	0.0651796	2.93017	1.18985	3.16332	0.132397	1.19194	0.376801	780.14	123.183	801.527	17.9424	795.891	34.318	102.741	100.708	100.708
MC	UAE_6380_41	bd	1.22862	0.0742233	#N/A	9.77099	#N/A	10.2572	81.184	7.1512	1.21248	0.0663247	1.23073	1.27879	1.72766	0.139837	1.21248	0.701804	816.641	51.4379	843.739	19.1494	836.313	19.5	103.318	100.888	100.888
MC	UAE_6380_42	bd	2.33116	0.127302	#N/A	25.3303	#N/A	19.4619	210.461	9.62276	1.13542	0.0599592	0.765277	0.859127	1.36925	0.10392	1.13542	0.829233	602.104	33.1261	637.342	13.7659	629.646	12.769	105.852	101.222	101.222
MC	UAE_6380_43	bd	0.771049	0.041641	#N/A	8.86904	#N/A	6.43718	73.69	10.3915	1.29334	0.0592606	2.02213	0.786304	2.40036	0.0962328	1.29334	0.53881	576.682	87.9054	592.294	14.6214	589.073	21.2335	102.707	100.547	100.547
MC	UAE_6380_44	bd	1.10549	0.0609796	#N/A	11.9371	#N/A	9.22929	99.1816	9.53873	1.24027	0.0606793	1.45256	0.877105	1.91002	0.104836	1.24027	0.649347	627.886	62.6057	642.686	15.1553	639.418	17.9645	102.357	100.511	100.511
MC	UAE_6380_45	bd	5.15404	0.33044	#N/A	36.7471	#N/A	43.029	305.32	6.41415	1.09827	0.0704623	0.354424	1.51467	1.15404	0.155905	1.09827	0.951672	941.854	14.5246	933.982	19.0701	936.328	14.019	99.1642	99.7494	99.7494
MC	UAE_6380_46	bd	4.75274	0.259316	#N/A	56.595	#N/A	39.6787	470.23	10.6428	1.15821	0.0600056	0.416055	0.777388	1.23067	0.0939603	1.15821	0.94112	603.778	18.0045	578.916	12.8128	583.992	10.8725	95.8823	99.1308	99.1308
MC	UAE_6380_47	bd	2.57675	0.153993	#N/A	30.994	#N/A	21.5122	257.519	10.6721	1.138	0.0662607	0.90055	0.856065	1.45122	0.0937021	1.138	0.784169	814.622	37.6502	577.395	12.5579	627.973	13.5025	70.8788	91.9459	91.9459		x
MC	UAE_6380_48	bd	1.96408	0.107779	#N/A	22.7637	#N/A	16.3973	189.136	10.3369	1.34446	0.0602722	0.886567	0.803944	1.61046	0.0967403	1.34446	0.834831	613.359	38.3041	595.278	15.2716	599.051	14.4715	97.0521	99.3702	99.3702
MC	UAE_6380_49	bd	1.90062	0.104627	#N/A	21.8455	#N/A	15.8675	181.507	10.365	1.21111	0.0604371	0.908349	0.803964	1.51389	0.0964788	1.21111	0.799994	619.261	39.2065	593.74	13.7246	599.062	13.6098	95.8789	99.1116	99.1116
MC	UAE_6380_50	bd	1.18839	0.0773443	#N/A	8.42772	#N/A	9.92139	70.0232	6.32616	1.29427	0.0717507	1.19079	1.56382	1.75873	0.158074	1.29427	0.735914	978.878	48.5224	946.063	22.7369	955.982	21.5546	96.6477	98.9624	98.9624
MC	UAE_6380_51	bd	1.27145	0.0768856	#N/A	9.30263	#N/A	10.6148	77.2926	6.82413	1.09341	0.0671	1.25339	1.35574	1.66329	0.146539	1.09341	0.657379	840.878	52.1835	881.532	17.9925	870.036	19.2554	104.835	101.321	101.321
MC	UAE_6380_52	bd	0.963669	0.0521891	#N/A	10.5297	#N/A	8.04528	87.4879	10.0242	1.24461	0.05938	1.64531	0.816755	2.06303	0.0997586	1.24461	0.603293	581.058	71.4715	612.994	14.5393	606.236	18.6622	105.496	101.115	101.115
MC	UAE_6380_53	bd	0.88429	0.0574008	#N/A	5.70226	#N/A	7.38258	47.3783	6.03314	1.16739	0.0713778	1.51582	1.63125	1.91324	0.165751	1.16739	0.610161	968.252	61.8674	988.659	21.3646	982.342	23.8061	102.108	100.643	100.643
MC	UAE_6380_54	bd	4.32367	0.229793	#N/A	53.9957	#N/A	36.0966	448.633	11.5761	1.11139	0.0582977	0.455561	0.694369	1.20113	0.0863849	1.11139	0.925284	540.967	19.9241	534.122	11.3838	535.422	9.9473	98.7347	99.7571	99.7571
MC	UAE_6380_55	bd	3.06304	0.16335	#N/A	38.5319	#N/A	25.5721	320.149	11.6234	1.25989	0.058579	0.63288	0.694882	1.40991	0.0860335	1.25989	0.893592	551.485	27.6298	532.036	12.855	535.729	11.6714	96.4733	99.3106	99.3106
MC	UAE_6380_56	bd	0.410173	0.023081	#N/A	4.52944	#N/A	3.42437	37.6337	10.2046	1.15634	0.0617322	3.44841	0.834101	3.63712	0.0979953	1.15634	0.317928	664.845	147.719	602.65	13.2921	615.885	33.0466	90.6451	97.851	97.851
MC	UAE_6380_57	bd	6.23154	0.883546	#N/A	15.3734	#N/A	52.0246	127.733	2.28338	1.21163	0.155813	0.15745	9.40867	1.22182	0.437947	1.21163	0.991662	2410.73	5.34871	2341.44	47.4023	2378.68	22.1843	97.126	98.4348	97.126
MC	UAE_6380_58	bd	0.409137	0.0239314	#N/A	3.58187	#N/A	3.41572	29.7606	8.13931	1.184	0.0643169	3.28433	1.08953	3.49123	0.122861	1.184	0.339136	752.069	138.698	747.007	16.6811	748.275	36.3111	99.327	99.8306	99.8306
MC	UAE_6380_59	bd	2.13612	0.116129	#N/A	25.2374	#N/A	17.8336	209.689	10.9577	1.17852	0.0591848	0.840184	0.744721	1.44735	0.0912604	1.17852	0.814261	573.901	36.5414	562.987	12.6944	565.157	12.469	98.0983	99.616	99.616
MC	UAE_6380_60	bd	3.3678	0.186774	#N/A	37.0045	#N/A	28.1164	307.459	10.1307	1.15423	0.0605849	0.551825	0.824566	1.27936	0.0987097	1.15423	0.902195	624.527	23.7972	606.843	13.3558	610.592	11.674	97.1684	99.3859	99.3859
MC	UAE_6380_61	bd	2.55791	0.162636	#N/A	17.0488	#N/A	21.355	141.653	5.99168	1.47036	0.0705103	0.611661	1.62258	1.59251	0.166898	1.47036	0.923298	943.252	25.061	994.997	27.057	978.989	19.8142	105.486	101.635	101.635
MC	UAE_6380_62	bd	3.53715	0.1939	#N/A	39.1982	#N/A	29.5302	325.685	9.84021	1.62334	0.0601467	0.528235	0.84277	1.70712	0.101624	1.62334	0.950922	608.857	22.8395	623.918	19.2783	620.673	15.7323	102.474	100.523	100.523
MC	UAE_6380_63	bd	3.60002	0.200158	#N/A	38.8194	#N/A	30.0551	322.538	9.55049	1.24081	0.061453	0.532449	0.887194	1.35022	0.104707	1.24081	0.918964	655.127	22.8452	641.933	15.145	644.861	12.8093	97.9861	99.546	99.546
MC	UAE_6380_64	bd	3.29706	0.213698	#N/A	23.7509	#N/A	27.5258	197.339	6.34093	1.1802	0.0710806	0.478381	1.54561	1.27347	0.157705	1.1802	0.926761	959.732	19.5505	944.013	20.6945	948.743	15.5819	98.3621	99.5015	99.5015
MC	UAE_6380_65	bd	2.25725	0.151916	#N/A	14.9116	#N/A	18.8449	123.896	5.86345	1.08264	0.0739196	0.677206	1.73823	1.277	0.170548	1.08264	0.847803	1039.27	27.3425	1015.13	20.3052	1022.81	16.3302	97.6769	99.2493	97.6769
MC	UAE_6380_66	bd	4.38167	0.271883	#N/A	34.4453	#N/A	36.5808	286.195	7.00449	1.08968	0.0680389	0.405557	1.33931	1.1627	0.142766	1.08968	0.937195	869.739	16.8081	860.282	17.5276	862.93	13.4291	98.9127	99.6931	99.6931
MC	UAE_6380_67	bd	0.801299	0.0435954	#N/A	9.25584	#N/A	6.68972	76.9038	10.1189	1.19642	0.059798	1.9262	0.814802	2.26752	0.0988245	1.19642	0.527632	596.272	83.4597	607.516	13.858	605.145	20.4668	101.886	100.392	100.392
MC	UAE_6380_67	bd	1.42496	0.209297	#N/A	3.44937	#N/A	11.8964	28.6597	2.17909	1.27051	0.161155	0.539904	10.1969	1.38047	0.458907	1.27051	0.920348	2467.81	18.235	2434.73	51.3209	2452.8	25.2147	98.6595	99.2634	98.6595
MC	UAE_6380_69	bd	1.18009	0.0650924	#N/A	13.2883	#N/A	9.85209	110.408	10.0089	1.26205	0.0602132	1.36163	0.82948	1.85656	0.0999109	1.26205	0.679778	611.245	58.85	613.887	14.7632	613.324	16.9518	100.432	100.092	100.092
MC	UAE_6380_70	bd	1.4078	0.0767159	#N/A	15.8461	#N/A	11.7532	131.66	9.98622	1.15511	0.0600633	1.18929	0.829295	1.65792	0.100138	1.15511	0.696722	605.855	51.4479	615.217	13.5415	613.221	15.1497	101.545	100.326	100.326
MC	UAE_6380_72	bd	1.47488	0.0807513	#N/A	16.7476	#N/A	12.3132	139.15	10.1425	1.17541	0.0600767	1.13189	0.816696	1.6318	0.0985946	1.17541	0.720316	606.339	48.9606	606.167	13.5861	606.203	14.789	99.9717	99.994	99.994
MC	UAE_6380_73	bd	1.25108	0.0797289	#N/A	9.13931	#N/A	10.4448	75.9356	6.42425	1.18807	0.0699018	1.13432	1.50026	1.64262	0.15566	1.18807	0.723279	925.469	46.6035	932.614	20.5989	930.492	19.8213	100.772	100.228	100.228
MC	UAE_6380_74	bd	0.566091	0.0345968	#N/A	4.53375	#N/A	4.72606	37.6695	6.99351	1.2158	0.0663739	2.36854	1.30859	2.66236	0.14299	1.2158	0.456662	818.19	98.9676	861.546	19.58	849.507	30.1932	105.299	101.417	101.417
MC	UAE_6380_75	bd	2.32339	0.122663	#N/A	29.8931	#N/A	19.397	248.372	11.2744	1.2261	0.0580233	0.795458	0.709595	1.46153	0.0886966	1.2261	0.838913	530.641	34.8507	547.824	12.8659	544.506	12.2451	103.238	100.609	100.609
MC	UAE_6380_76	bd	2.33636	0.124171	#N/A	30.3475	#N/A	19.5053	252.148	11.3636	1.17874	0.0583876	0.769959	0.708442	1.40793	0.088	1.17874	0.837215	544.335	33.6551	543.698	12.2802	543.821	11.7875	99.8829	99.9774	99.9774
MC	UAE_6380_77	bd	5.54708	0.306303	#N/A	63.8269	#N/A	46.3103	530.317	10.0807	1.2411	0.0606275	0.350082	0.829243	1.28953	0.0991999	1.2411	0.962444	626.043	15.0933	609.718	14.4246	613.192	11.8025	97.3924	99.4335	99.4335
MC	UAE_6380_78	bd	1.97732	0.112283	#N/A	20.4376	#N/A	16.5078	169.809	9.0365	1.29422	0.0624159	0.864122	0.952349	1.55619	0.110662	1.29422	0.831663	688.389	36.873	676.593	16.6041	679.325	15.2998	98.2864	99.5979	99.5979
MC	UAE_6380_79	bd	0.94054	0.0529495	#N/A	9.96048	#N/A	7.85219	82.7584	9.23866	1.25968	0.0620377	1.63786	0.925865	2.06625	0.108241	1.25968	0.609648	675.407	70.0385	662.523	15.8428	665.457	19.9749	98.0924	99.5591	99.5591
MC	UAE_6380_80	bd	0.58782	0.0332253	#N/A	6.18874	#N/A	4.90747	51.4203	9.20751	1.29827	0.0619641	2.45713	0.927896	2.77903	0.108607	1.29827	0.467167	672.87	105.116	664.653	16.3773	666.527	26.8054	98.7789	99.7188	99.7188
MC	UAE_6380_81	bd	3.61986	0.202036	#N/A	42.1692	#N/A	30.2207	350.37	10.1696	1.369	0.0604925	0.523855	0.82016	1.4658	0.0983323	1.369	0.933957	621.236	22.6034	604.628	15.7827	608.138	13.3251	97.3267	99.4229	99.4229
MC	UAE_6380_82	bd	1.24654	0.069423	#N/A	13.6919	#N/A	10.4069	113.762	9.45078	1.1731	0.0612062	1.29184	0.892954	1.745	0.105811	1.1731	0.672266	646.488	55.5068	648.376	14.456	647.955	16.5803	100.292	100.065	100.065
MC	UAE_6380_83	bd	0.525034	0.0293282	#N/A	5.919	#N/A	4.3833	49.1791	9.67203	1.25218	0.061363	2.74369	0.874762	3.01592	0.103391	1.25218	0.41519	651.982	117.781	634.25	15.1098	638.15	28.1827	97.2804	99.3889	99.3889
MC	UAE_6380_84	bd	2.55155	0.139436	#N/A	30.2136	#N/A	21.3019	251.035	10.1715	1.36912	0.0599397	0.720503	0.812513	1.54713	0.0983137	1.36912	0.884941	601.4	31.1916	604.519	15.7814	603.863	13.9875	100.519	100.109	100.109
MC	UAE_6380_85	bd	0.396428	0.0223654	#N/A	4.11381	#N/A	3.30962	34.1803	8.93655	1.26621	0.0619607	3.45725	0.955978	3.68182	0.1119	1.26621	0.343907	672.753	147.905	683.773	16.4083	681.211	35.901	101.638	100.376	100.376
MC	UAE_6380_86	bd	0.708669	0.0397513	#N/A	7.3925	#N/A	5.91639	61.4219	8.89487	1.46223	0.0619781	2.08223	0.960727	2.54436	0.112424	1.46223	0.574693	673.354	89.071	686.812	19.0245	683.673	25.0071	101.999	100.459	100.459
MC	UAE_6380_87	bd	1.28267	0.0703759	#N/A	14.2121	#N/A	10.7085	118.084	9.67212	1.30648	0.060635	1.26484	0.864377	1.81843	0.10339	1.30648	0.718464	626.312	54.5291	634.245	15.7641	632.509	16.9781	101.267	100.274	100.274
MC	UAE_6380_88	bd	1.92691	0.0994258	#N/A	25.0848	#N/A	16.087	208.422	11.1486	1.22152	0.0566439	0.956162	0.700544	1.55124	0.0896976	1.22152	0.787446	477.698	42.2731	553.749	12.9505	539.116	12.8952	115.92	102.714	102.714
MC	UAE_6380_89	bd	1.60967	0.0942906	#N/A	14.4121	#N/A	13.4385	119.746	7.72227	1.19994	0.0644263	0.994313	1.15032	1.55837	0.129496	1.19994	0.769997	755.656	41.9658	784.987	17.7125	777.395	16.79	103.881	100.977	100.977
MC	UAE_6380_90	bd	0.722848	0.0455834	#N/A	5.64059	#N/A	6.03476	46.8659	6.77657	1.20749	0.0694933	1.8614	1.41395	2.21875	0.147567	1.20749	0.544219	913.418	76.6193	887.313	19.988	894.822	26.0549	97.142	99.1609	99.1609
MC	UAE_6380_91	bd	12.1477	1.80714	#N/A	29.4715	#N/A	101.416	244.869	2.10775	1.10174	0.16353	0.097797	10.6974	1.10607	0.47444	1.10174	0.996083	2492.49	3.29489	2503	45.5455	2497.2	20.3364	100.422	100.232	100.422
MC	UAE_6380_92	bd	3.10886	0.167565	#N/A	38.235	#N/A	25.9546	317.682	10.5895	1.15673	0.0592223	0.593551	0.7711	1.30012	0.0944331	1.15673	0.889706	575.279	25.8088	581.702	12.8553	580.394	11.4305	101.116	100.225	100.225
MC	UAE_6380_94	bd	0.261948	0.0143907	#N/A	2.90949	#N/A	2.1869	24.174	9.4582	1.25353	0.0607212	5.11362	0.885184	5.26502	0.105728	1.25353	0.238086	629.374	220.344	647.892	15.4349	643.778	49.0025	102.942	100.639	100.639
MC	UAE_6380_95	bd	2.0573	0.113369	#N/A	23.8912	#N/A	17.1756	198.504	9.99071	1.18644	0.0604778	0.841955	0.834643	1.45483	0.100093	1.18644	0.815519	620.714	36.332	614.954	13.9027	616.185	13.3525	99.072	99.8001	99.8001
MC	UAE_6380_96	bd	1.62894	0.0907058	#N/A	18.0606	#N/A	13.5994	150.06	9.55606	1.1119	0.0609499	1.02245	0.879419	1.51054	0.104646	1.1119	0.736094	637.467	43.9979	641.577	13.5661	640.669	14.2532	100.645	100.142	100.142
MC	UAE_6380_97	bd	1.89356	0.104053	#N/A	21.9449	#N/A	15.8086	182.333	9.94795	1.154	0.0602359	0.91705	0.834878	1.474	0.100523	1.154	0.782899	612.06	39.6297	617.474	13.5757	616.315	13.5294	100.885	100.188	100.188
MC	UAE_6380_98	bd	0.198647	0.0117136	#N/A	1.75075	#N/A	1.65842	14.5464	7.66747	1.23668	0.0648559	6.14091	1.16627	6.26419	0.130421	1.23668	0.197421	769.665	258.596	790.267	18.3694	784.897	66.2766	102.677	100.684	100.684
MC	UAE_6380_99	bd	0.55386	0.0328065	#N/A	4.89166	#N/A	4.62395	40.6432	7.66906	1.25974	0.0649151	2.47095	1.16709	2.77355	0.130394	1.25974	0.454199	771.587	104.021	790.113	18.708	785.283	29.8893	102.401	100.615	100.615
MC / SC	Whther the sample was run on the Nu Plasma MC-ICP-MS or Nu Attom SC-ICP-MS
	Note that Th isn't measured on the MC-ICP-MS
bd	below detection
cps	counts per second
204Pb cps	204Pb cps after subtraction of 204Hg based on measured 202Hg/204Hg ratio
Disc. %	Discordance in %
